# Supplementary material for: Syntheses of selenoesters through C–H selenation of aldehydes with diselenides under metal-free and solvent-free conditions
Source: Royal Society of Chemistry journal article supplement (doi:10.1039/c4ra07983c), 2014-01-01

## Supplementary Information

### Syntheses of Selenoesters Through C-H Selenation of Aldehydes with Diselenides Under Metal-Free and Solvent-Free Conditions

**Jyun-Cyuan Liou,<sup>§</sup> Satpal Singh Badsara,<sup>§</sup> Yu-Ting Huang, and  
Chin-Fa Lee\***

Department of Chemistry, National Chung Hsing University, Taichung 402, Taiwan, R.O.C,

Fax: (+886) 4-2286-2547

E-mail: [cfalee@dragon.nchu.edu.tw](mailto:cfalee@dragon.nchu.edu.tw)

<sup>§</sup> Both authors contributed equally to this work.

***Se*-phenyl 4-methoxybenzoselenoate (3a)**

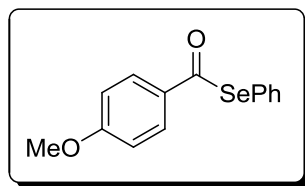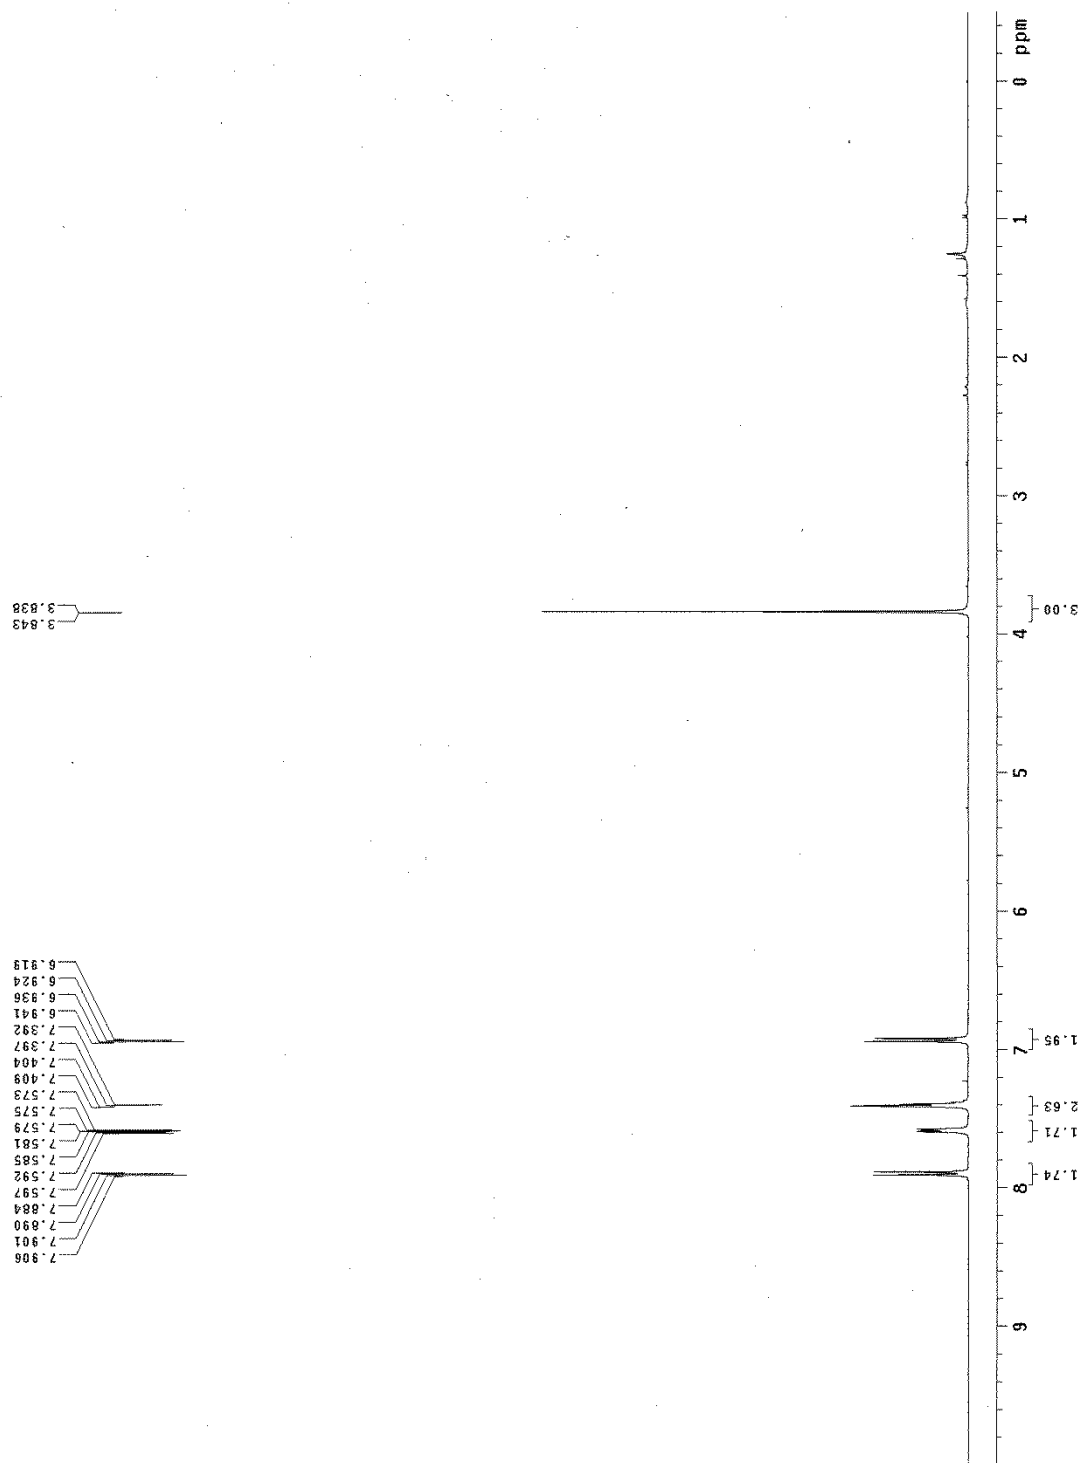

***Se*-phenyl 4-methoxybenzoselenoate (3a)**

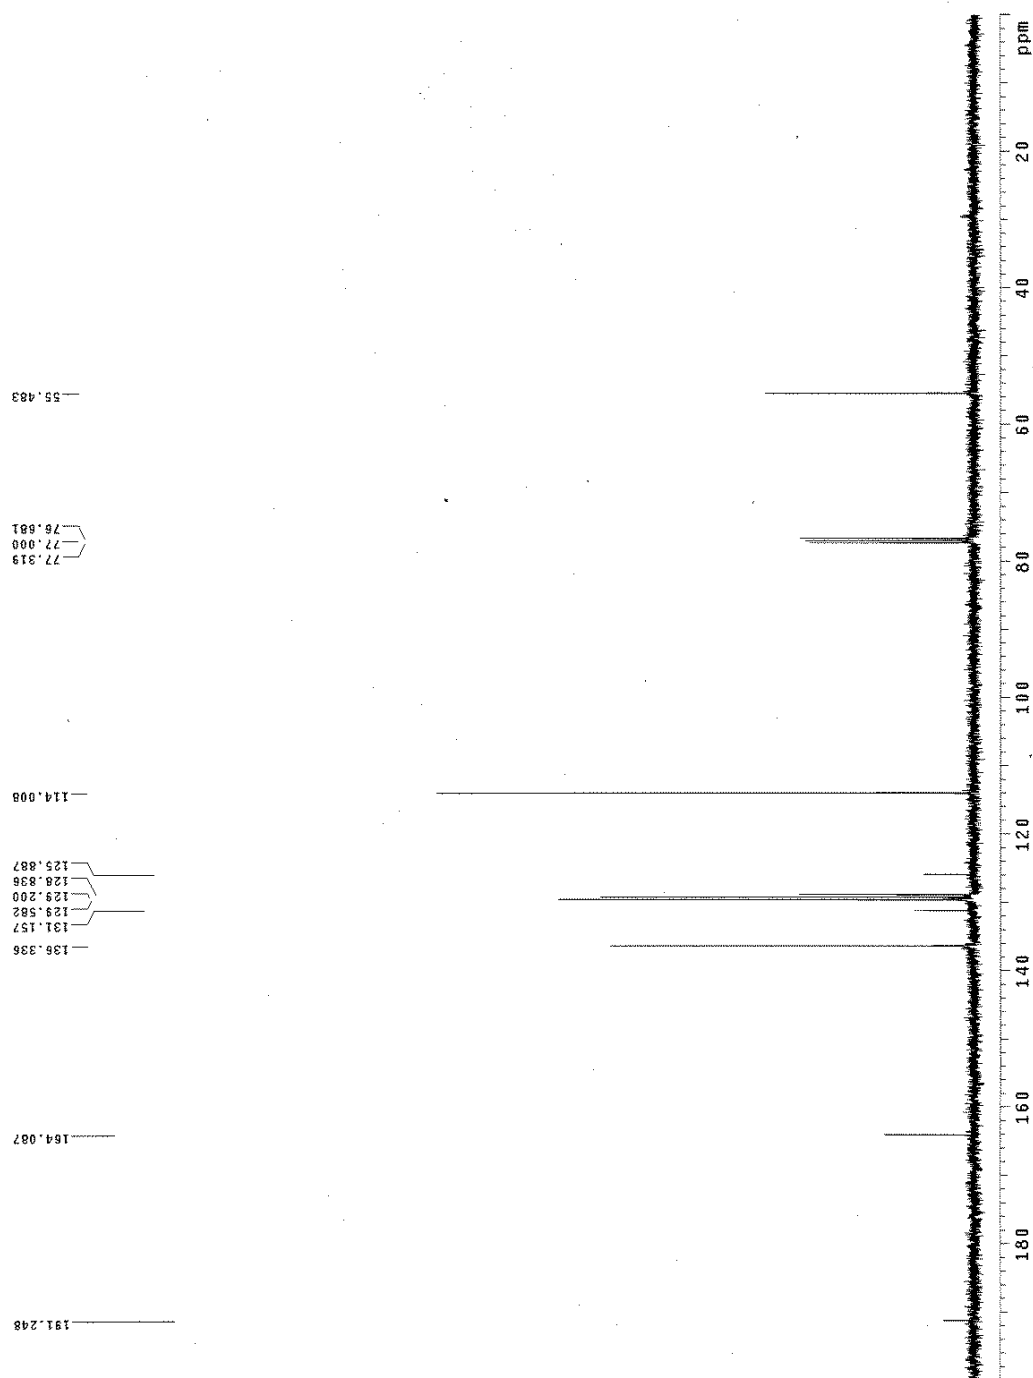

**Se-4-Bromophenyl 3-methylbenzoselenoate (3b)**

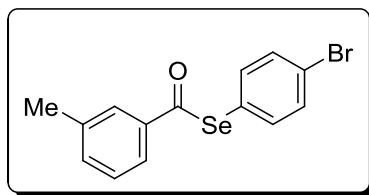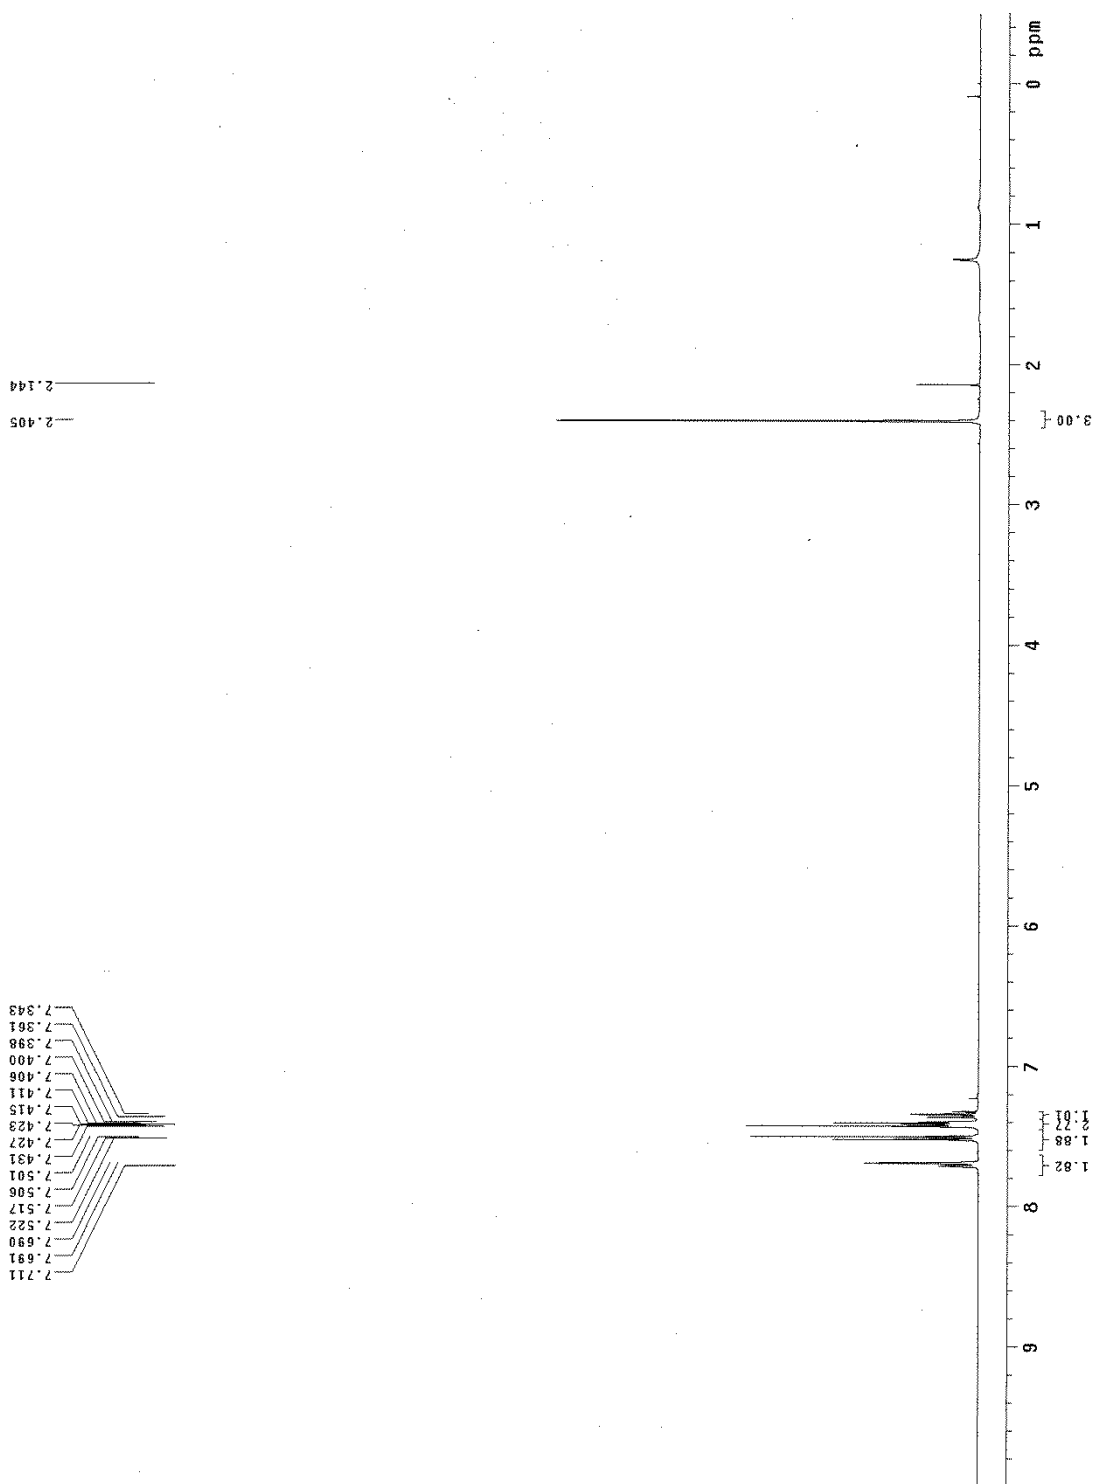

**Se-4-Bromophenyl 3-methylbenzoselenoate (3b)**

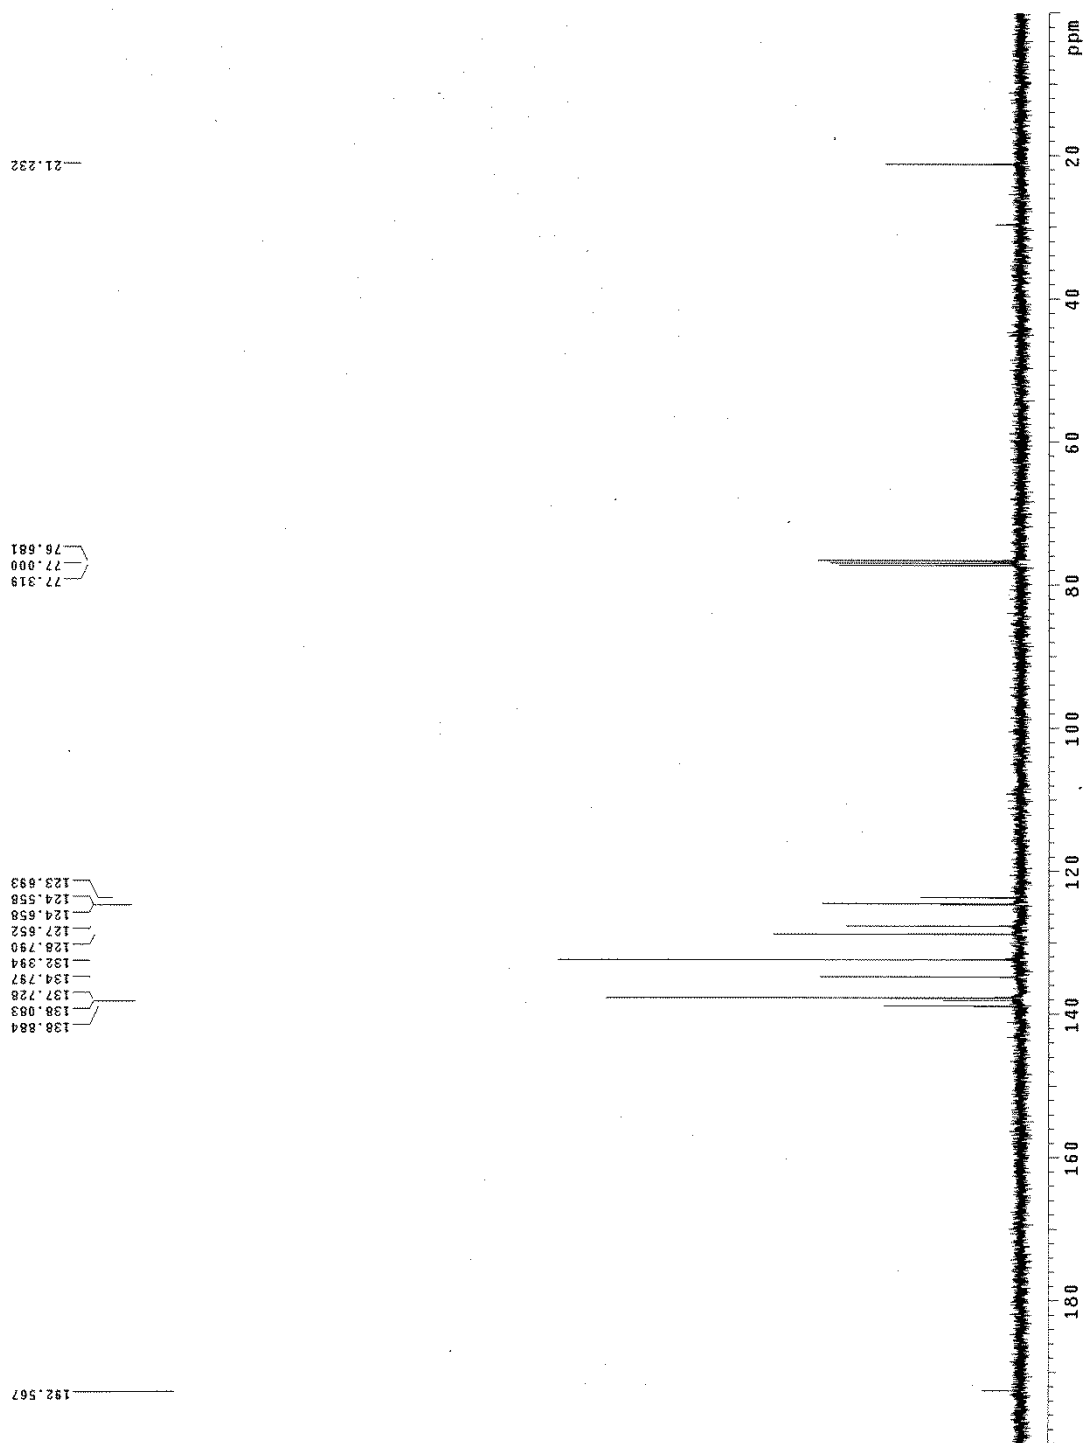

***Se*-4-Bromophenyl 2-methylbenzoselenoate (3c)**

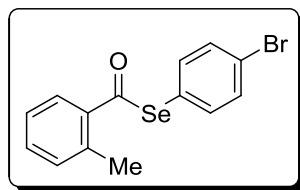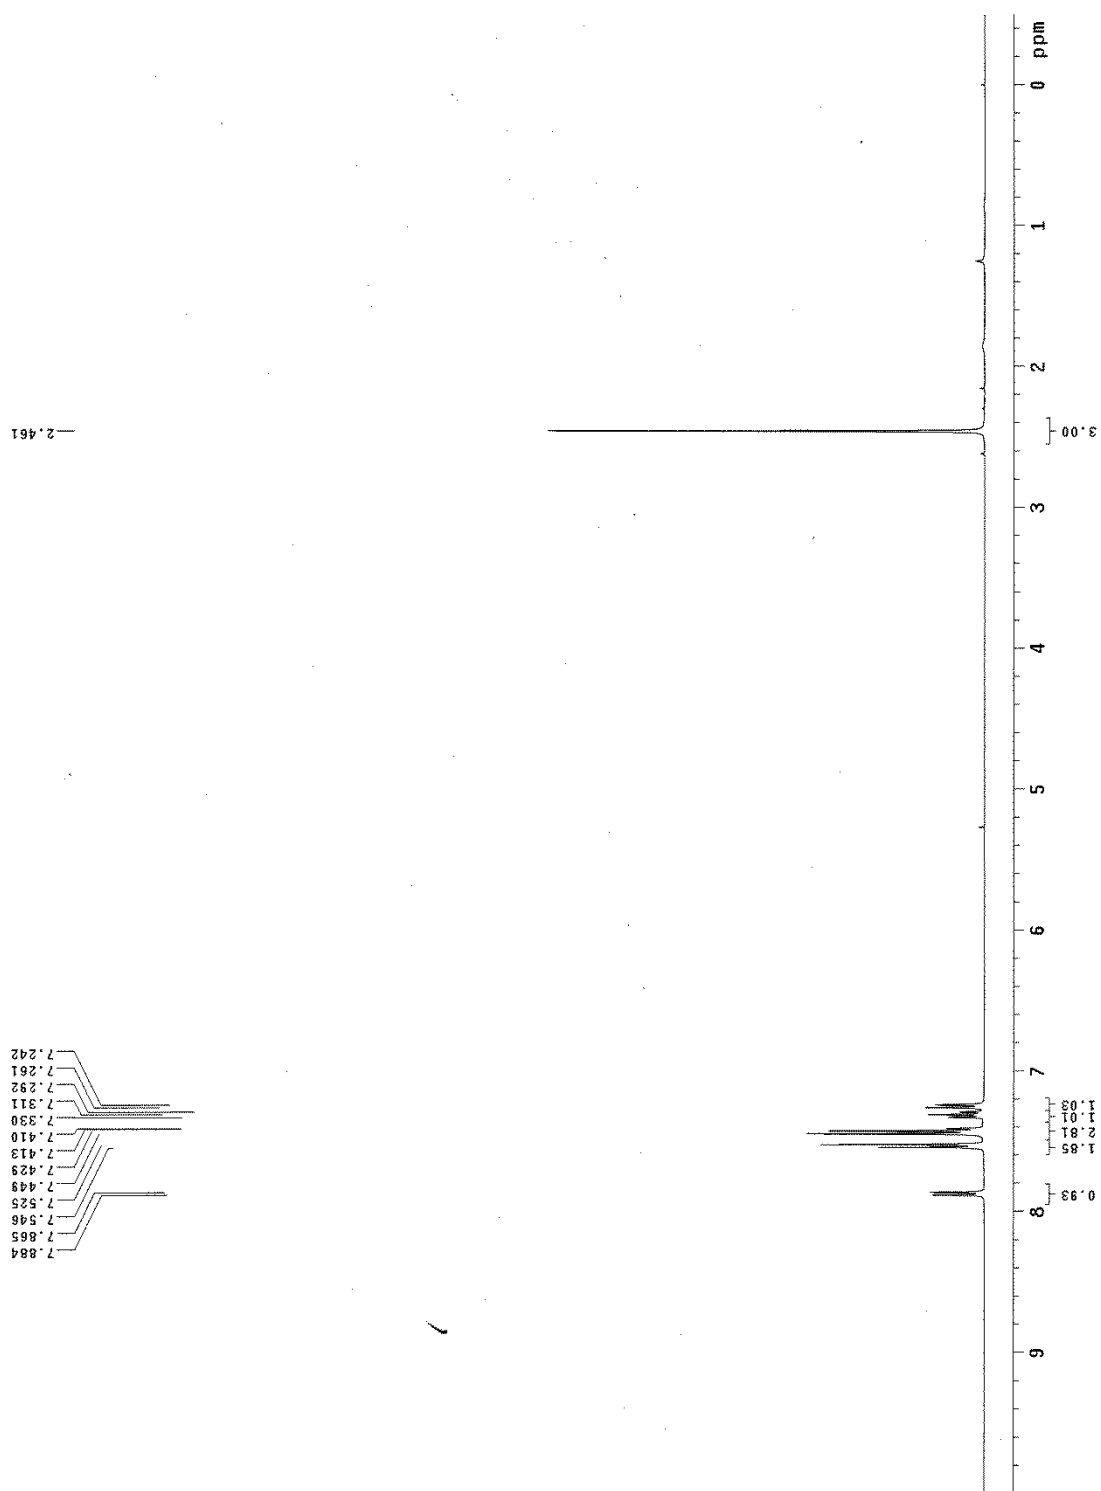

***Se*-4-Bromophenyl 2-methylbenzoselenoate (3c)**

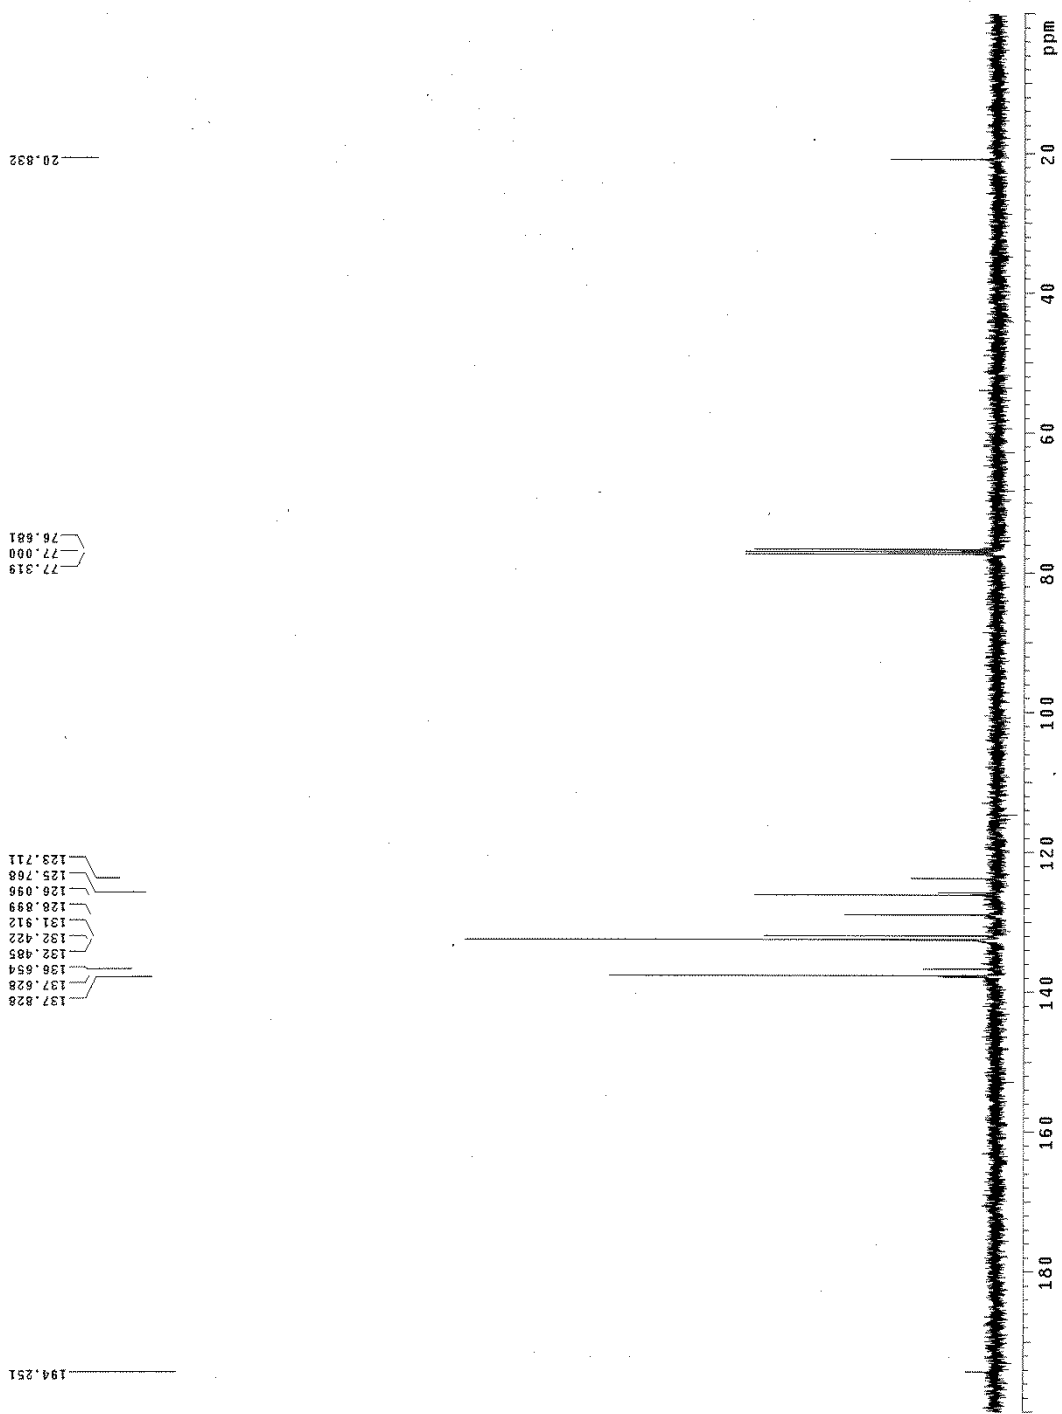

***Se*-4-Bromophenyl benzoselenoate (3d)**

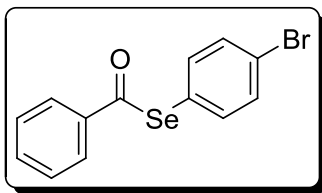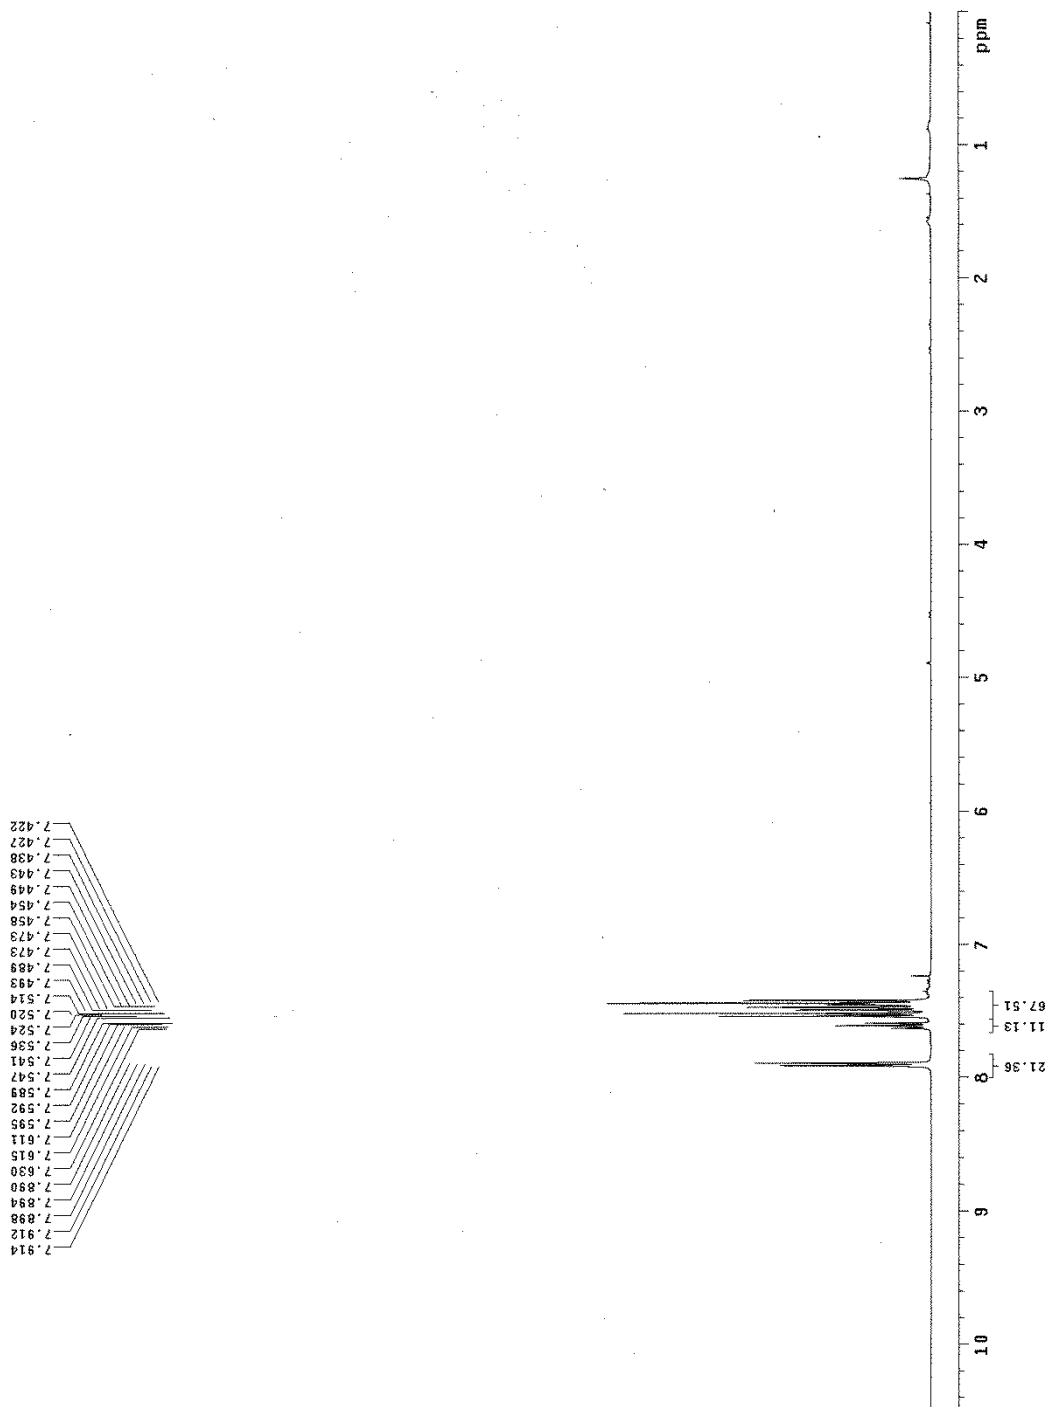



***Se*-4-Bromophenyl benzoselenoate (3d)**

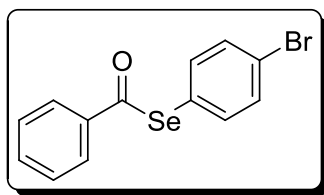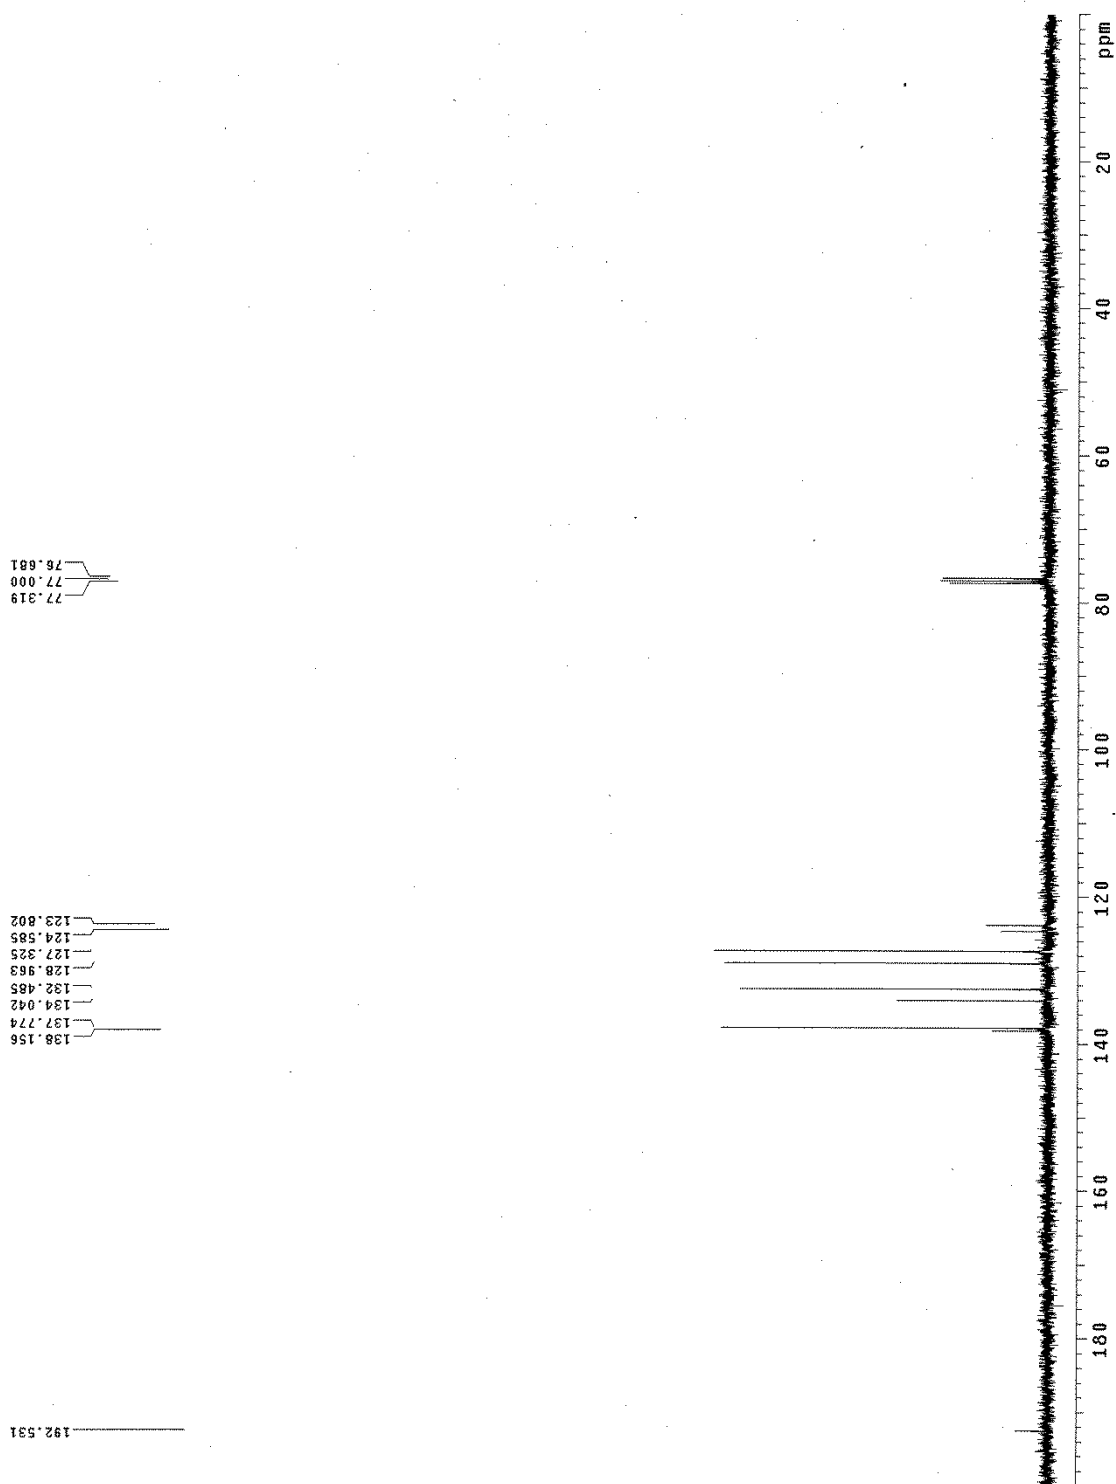

**Se-4-Bromophenyl 4-methoxybenzoate (3e)**

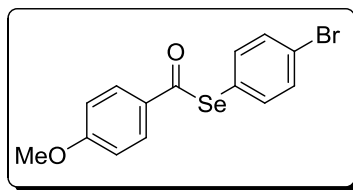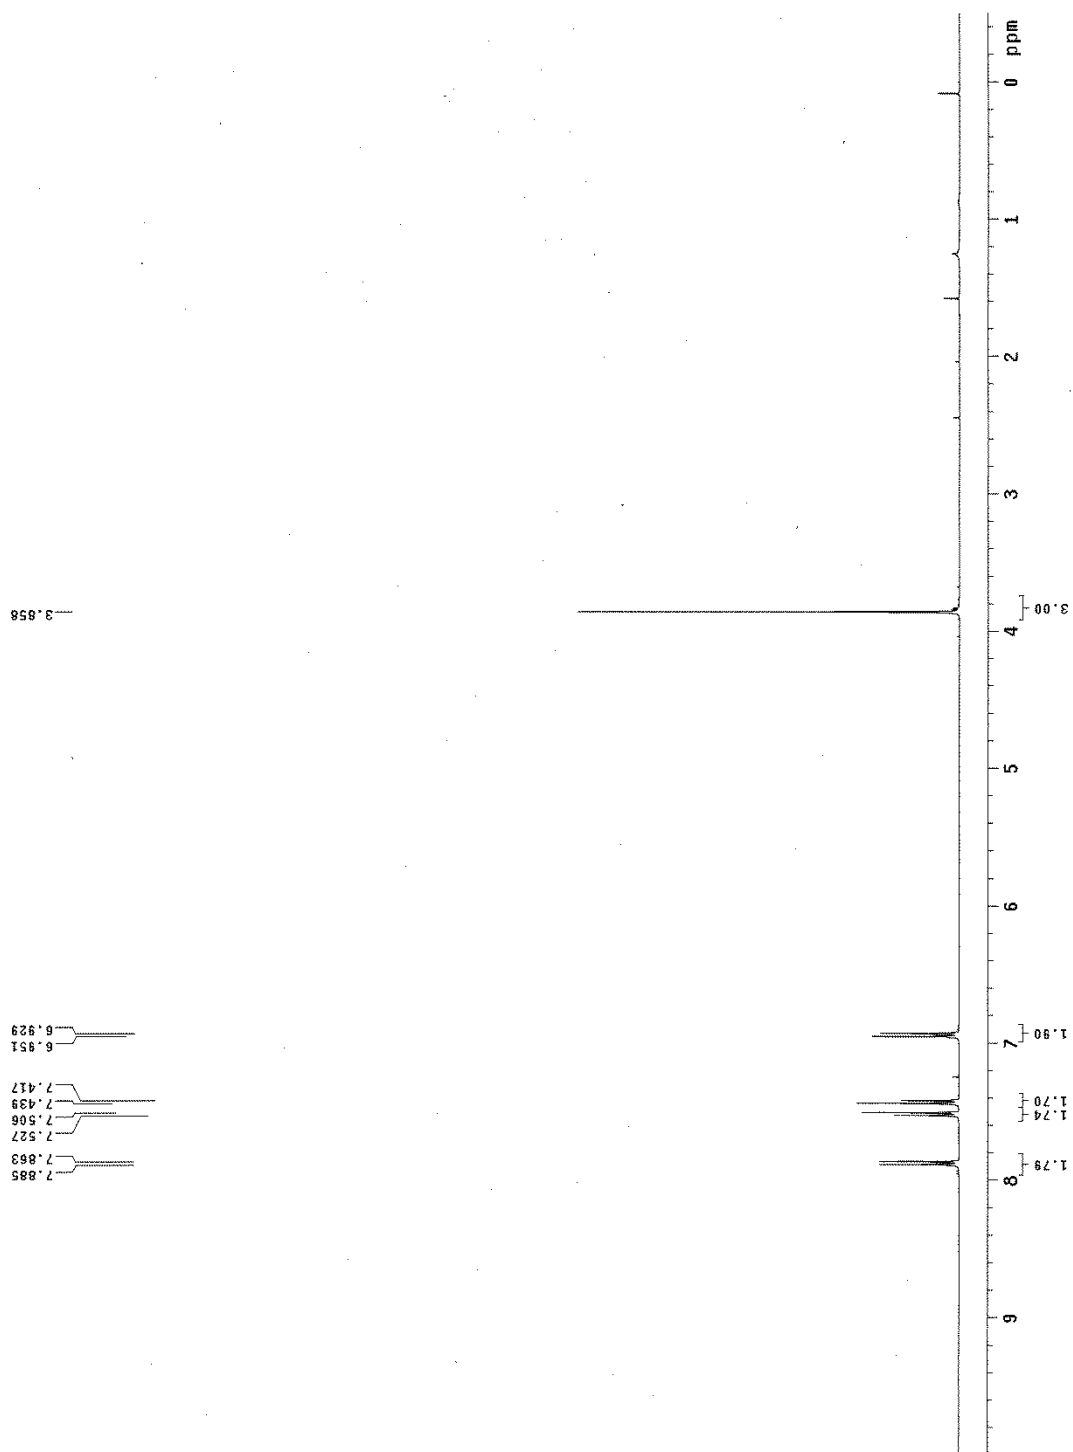

**Se-4-Bromophenyl 4-methoxybenzoate (3e)**

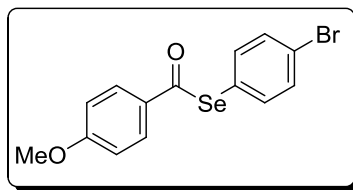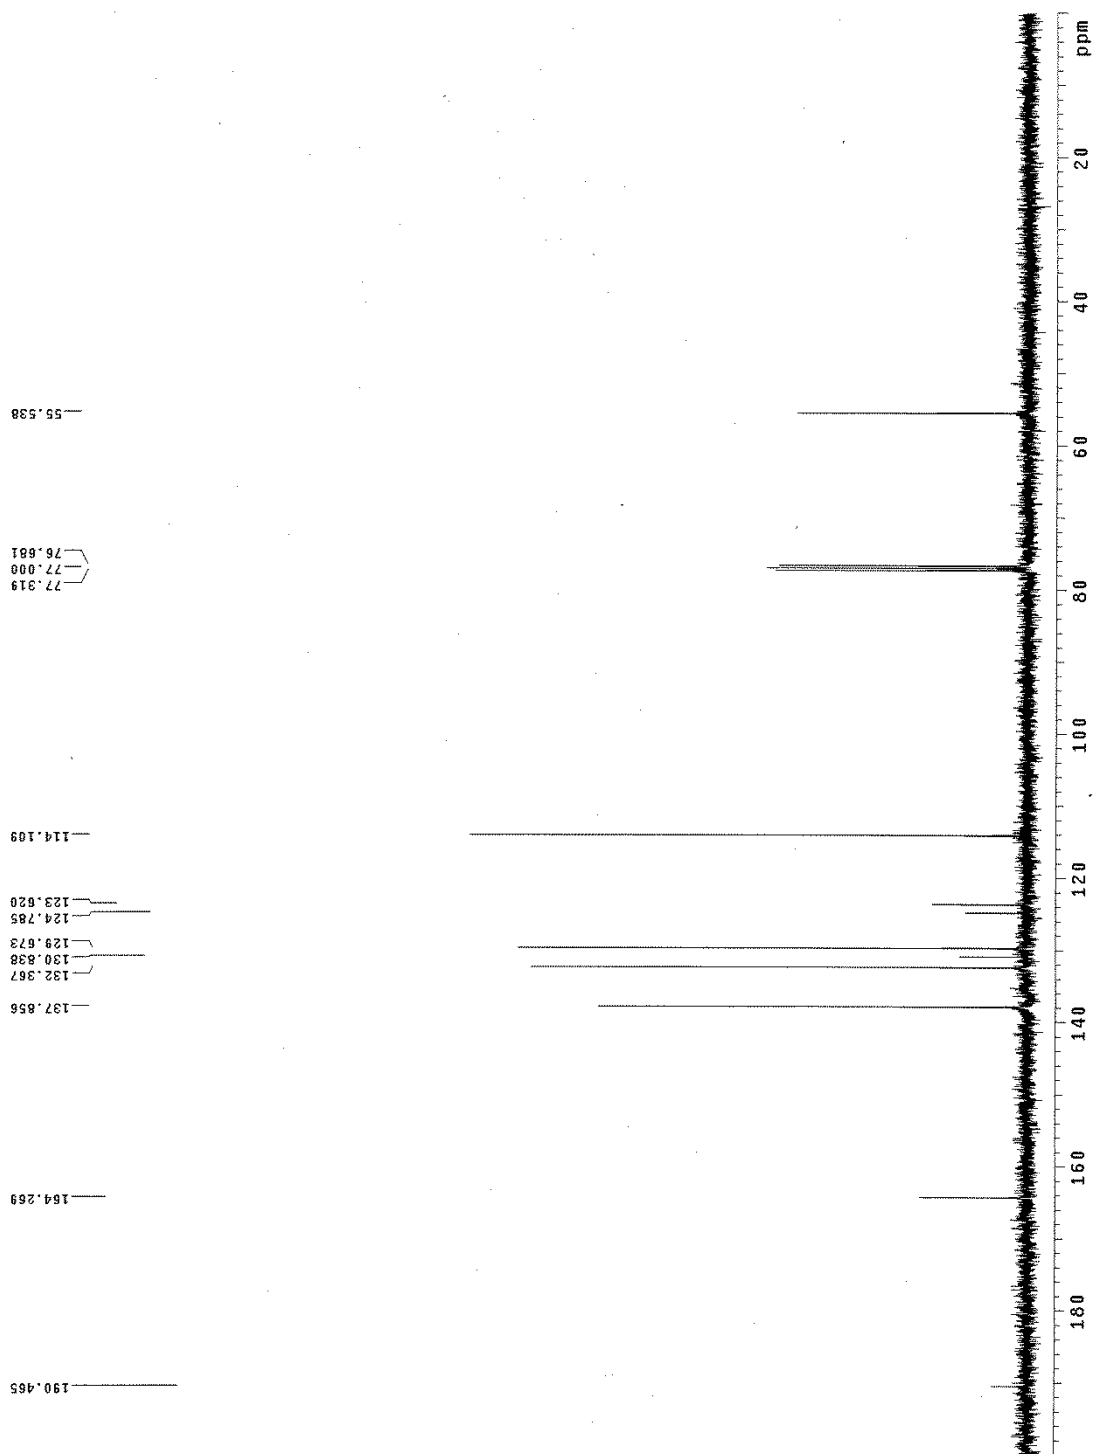

***Se*-4-Bromophenyl thiophene-2-carboselenoate (3f)**

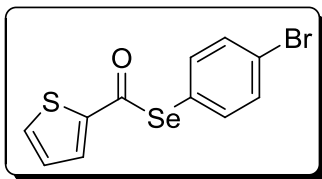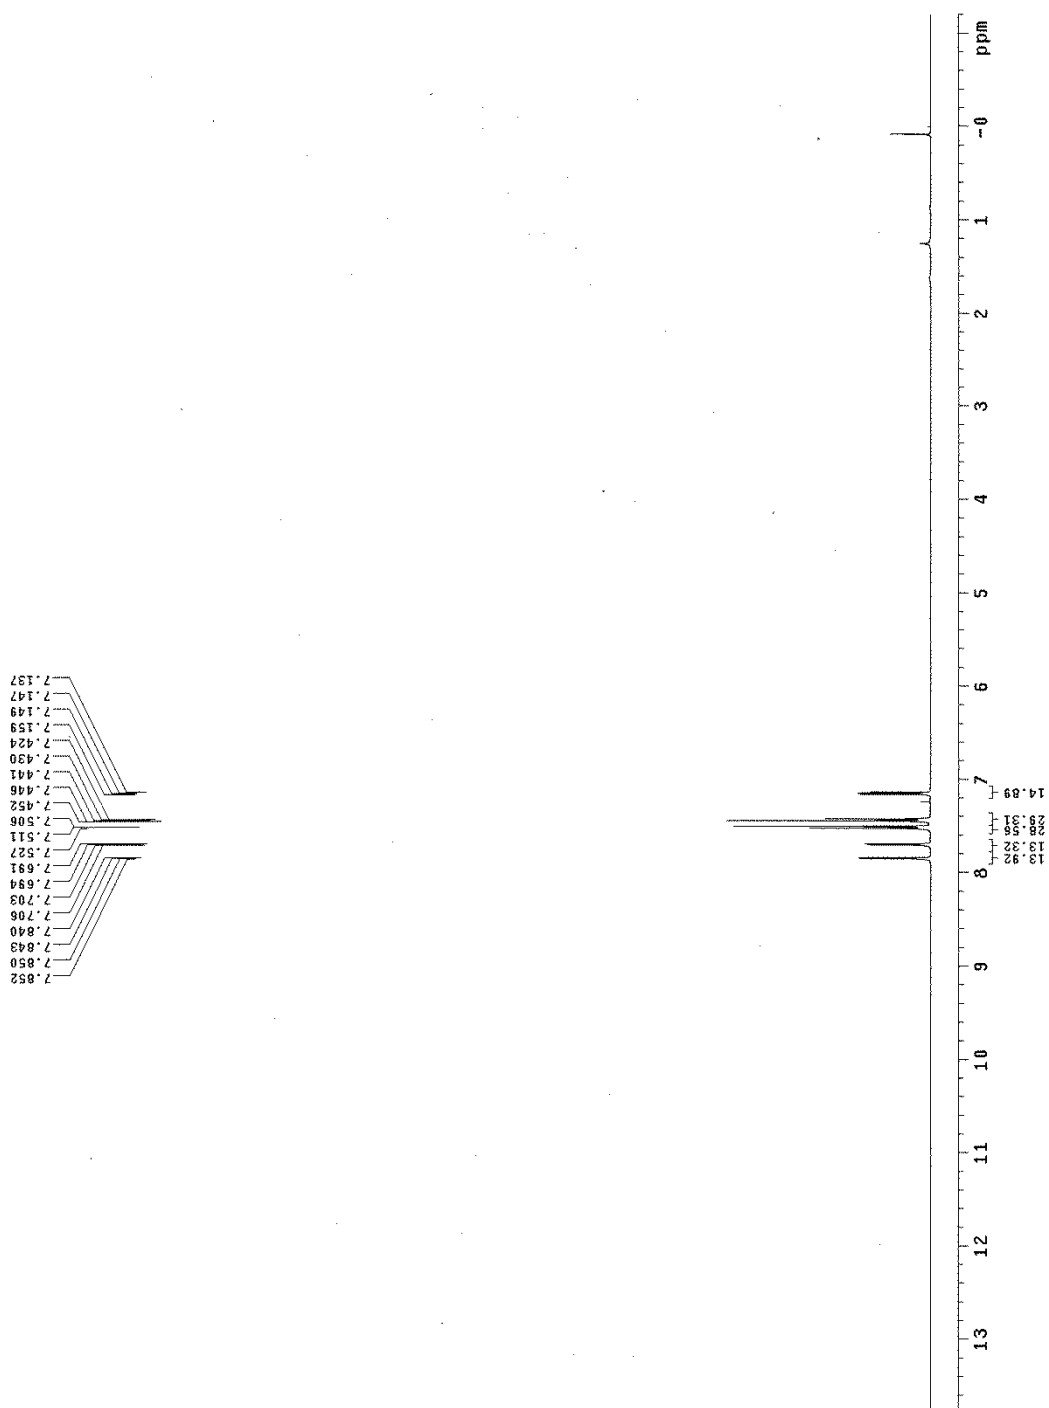

***Se*-4-Bromophenyl thiophene-2-carboselenoate (3f)**

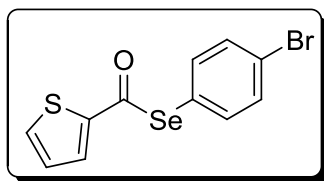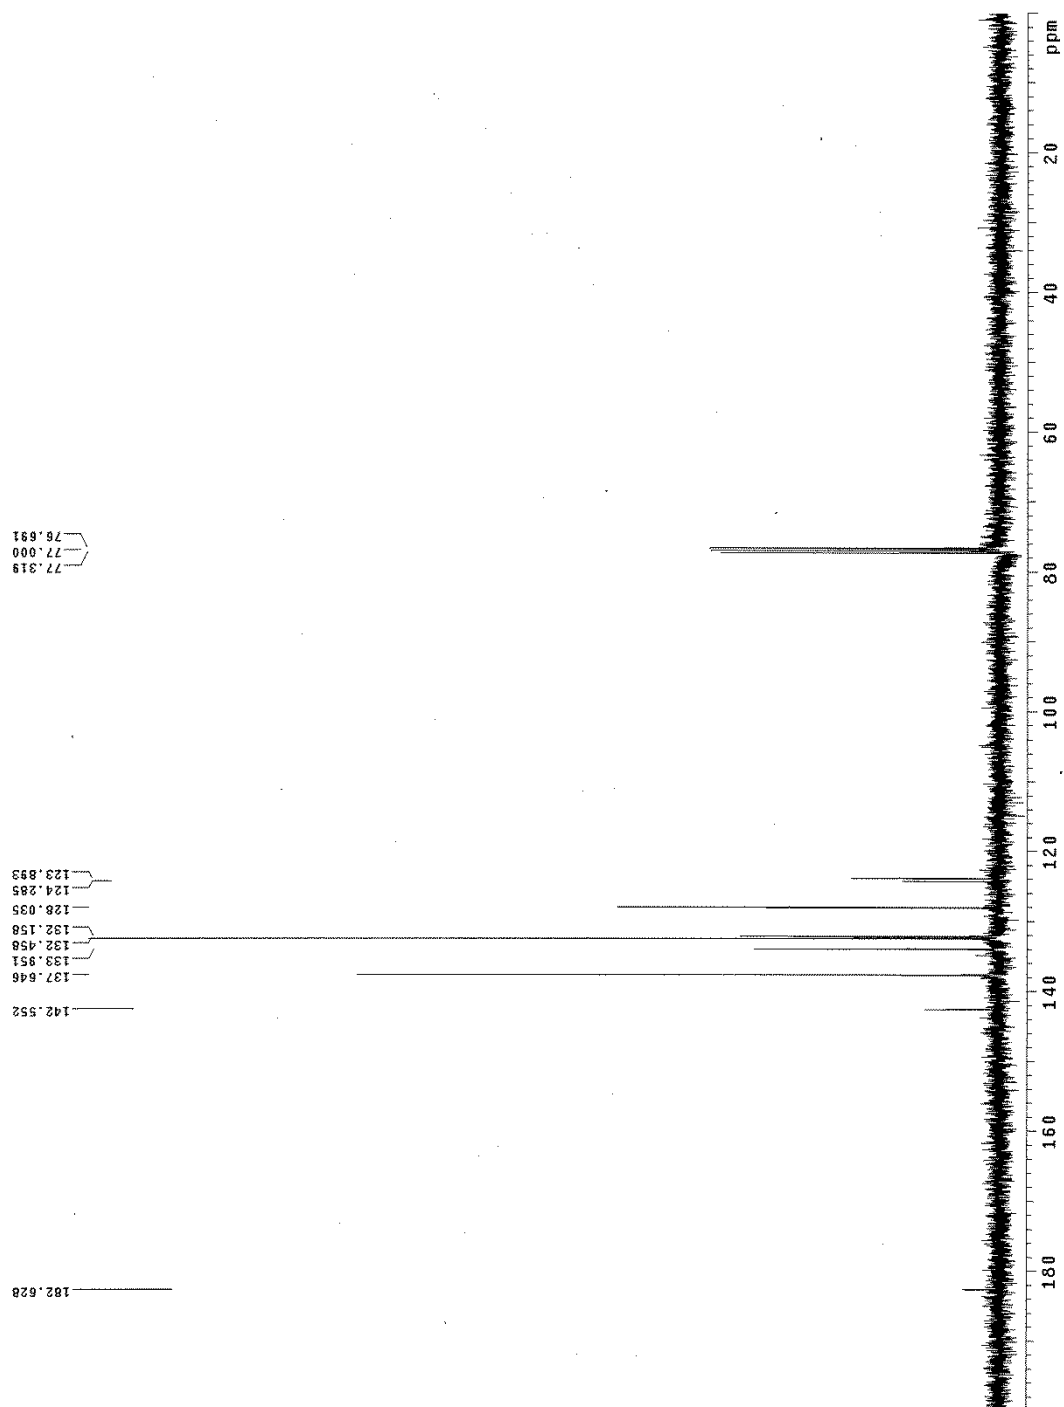

***Se*-4-(Trifluoromethyl)phenyl benzoselenoate (3g)**

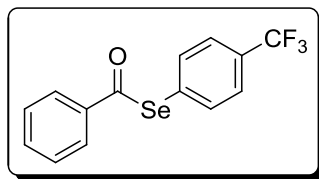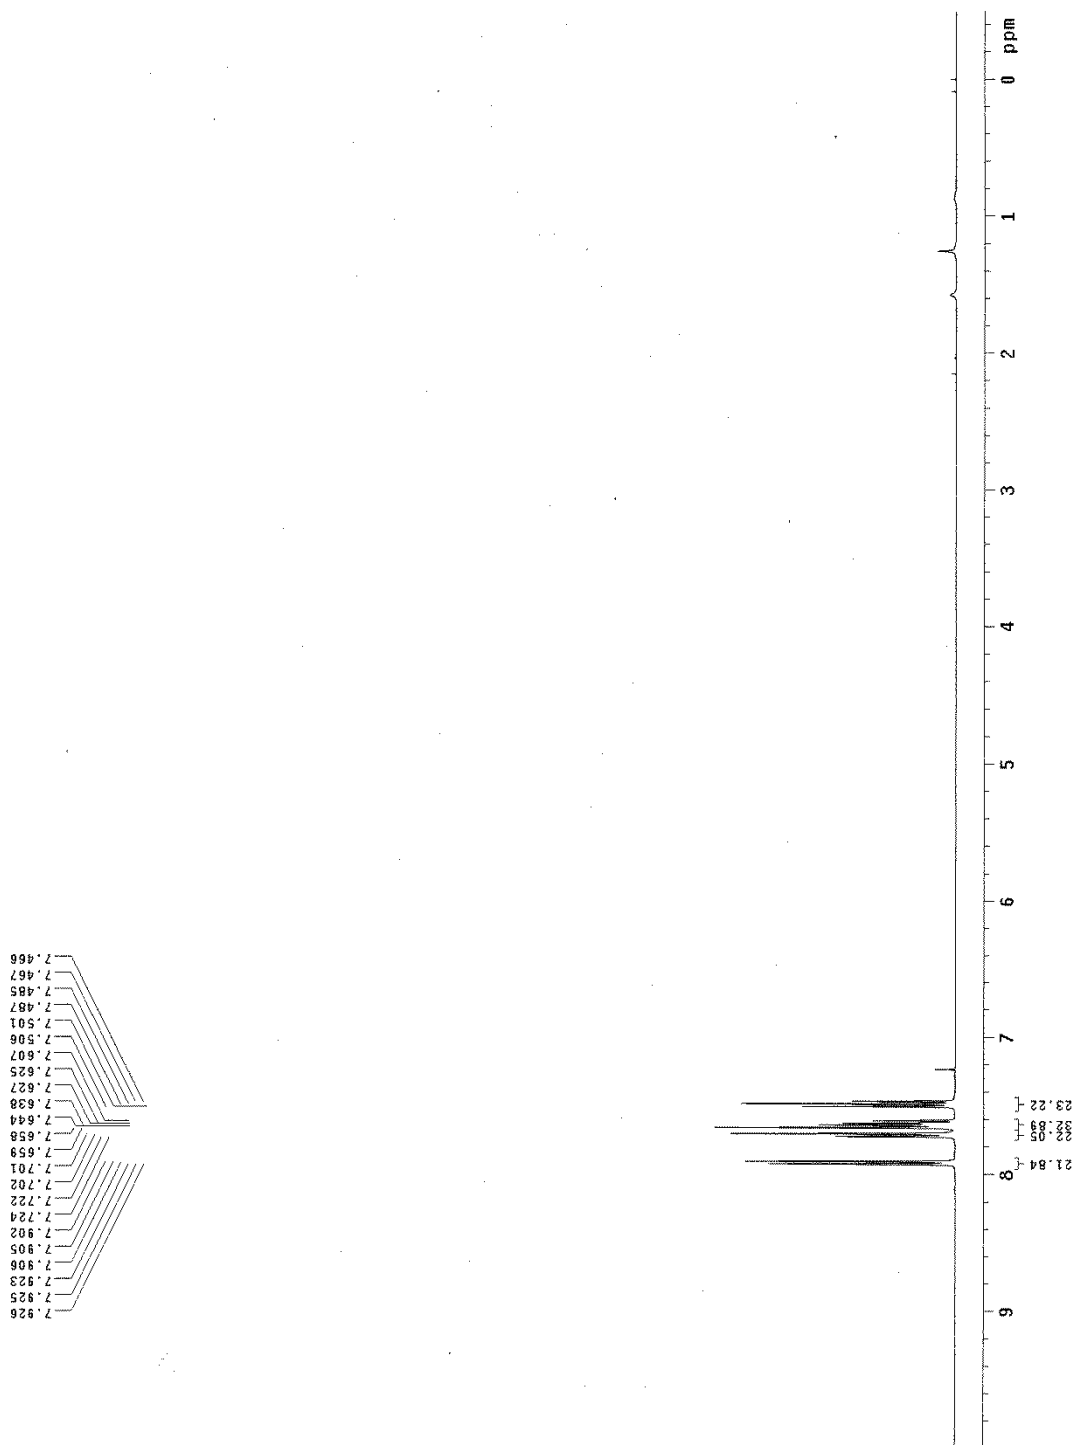

***Se*-4-(Trifluoromethyl)phenyl benzoselenoate (3g)**

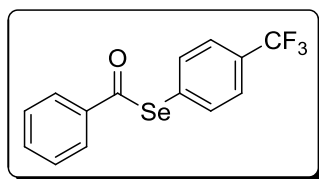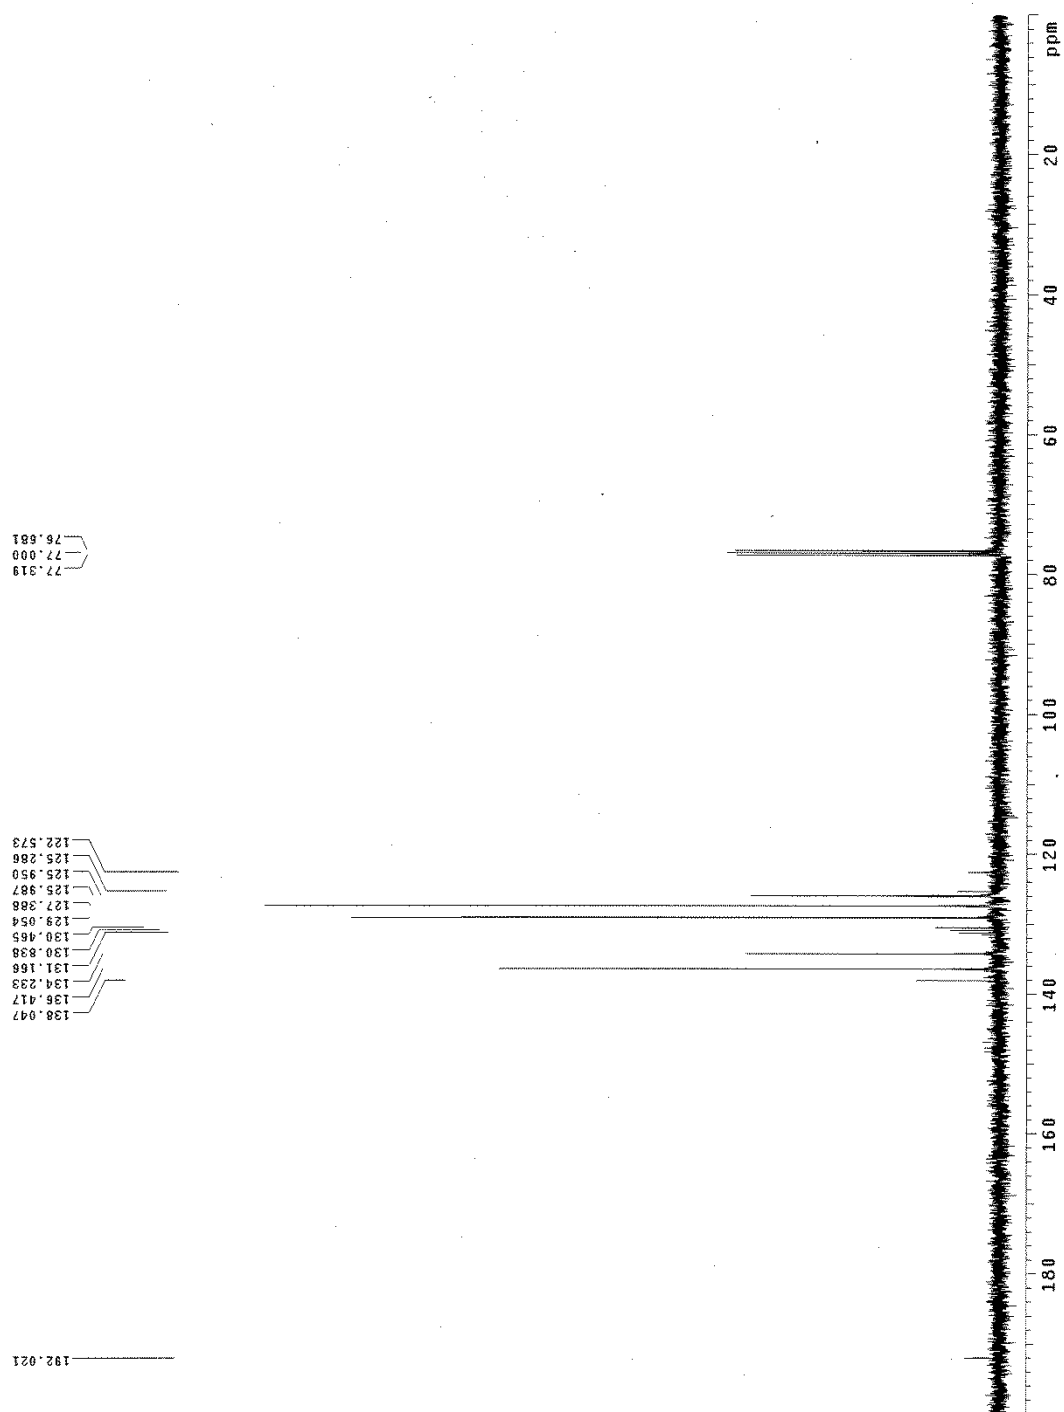

***Se*-4-(Trifluoromethyl)phenyl benzoselenoate (3g)**

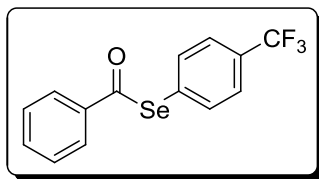

64.265

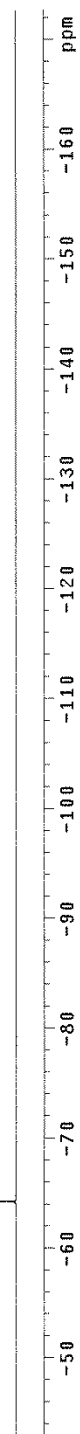



***Se*-4-(Trifluoromethyl)phenyl thiophene-2-carboselenoate (3h)**

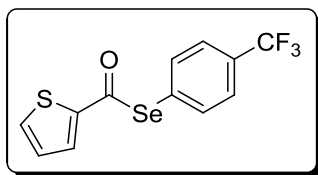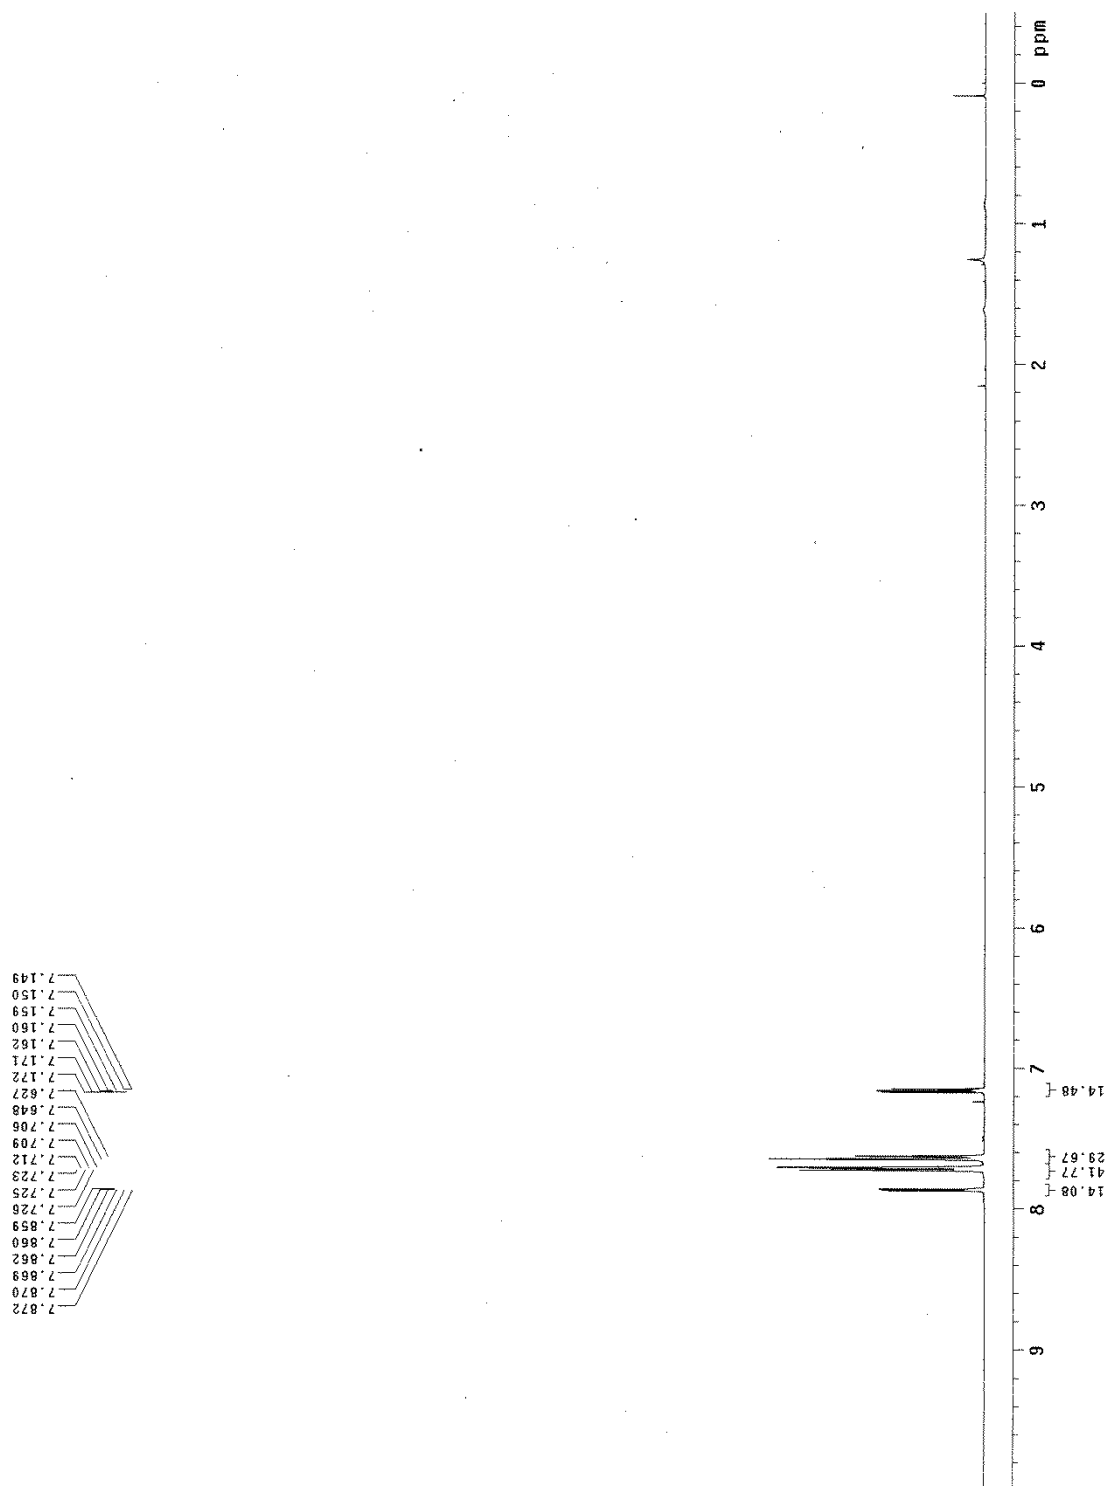

***Se*-4-(Trifluoromethyl)phenyl thiophene-2-carboselenoate (3h)**

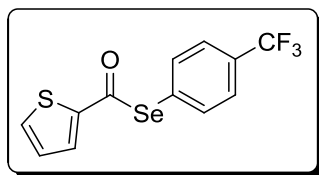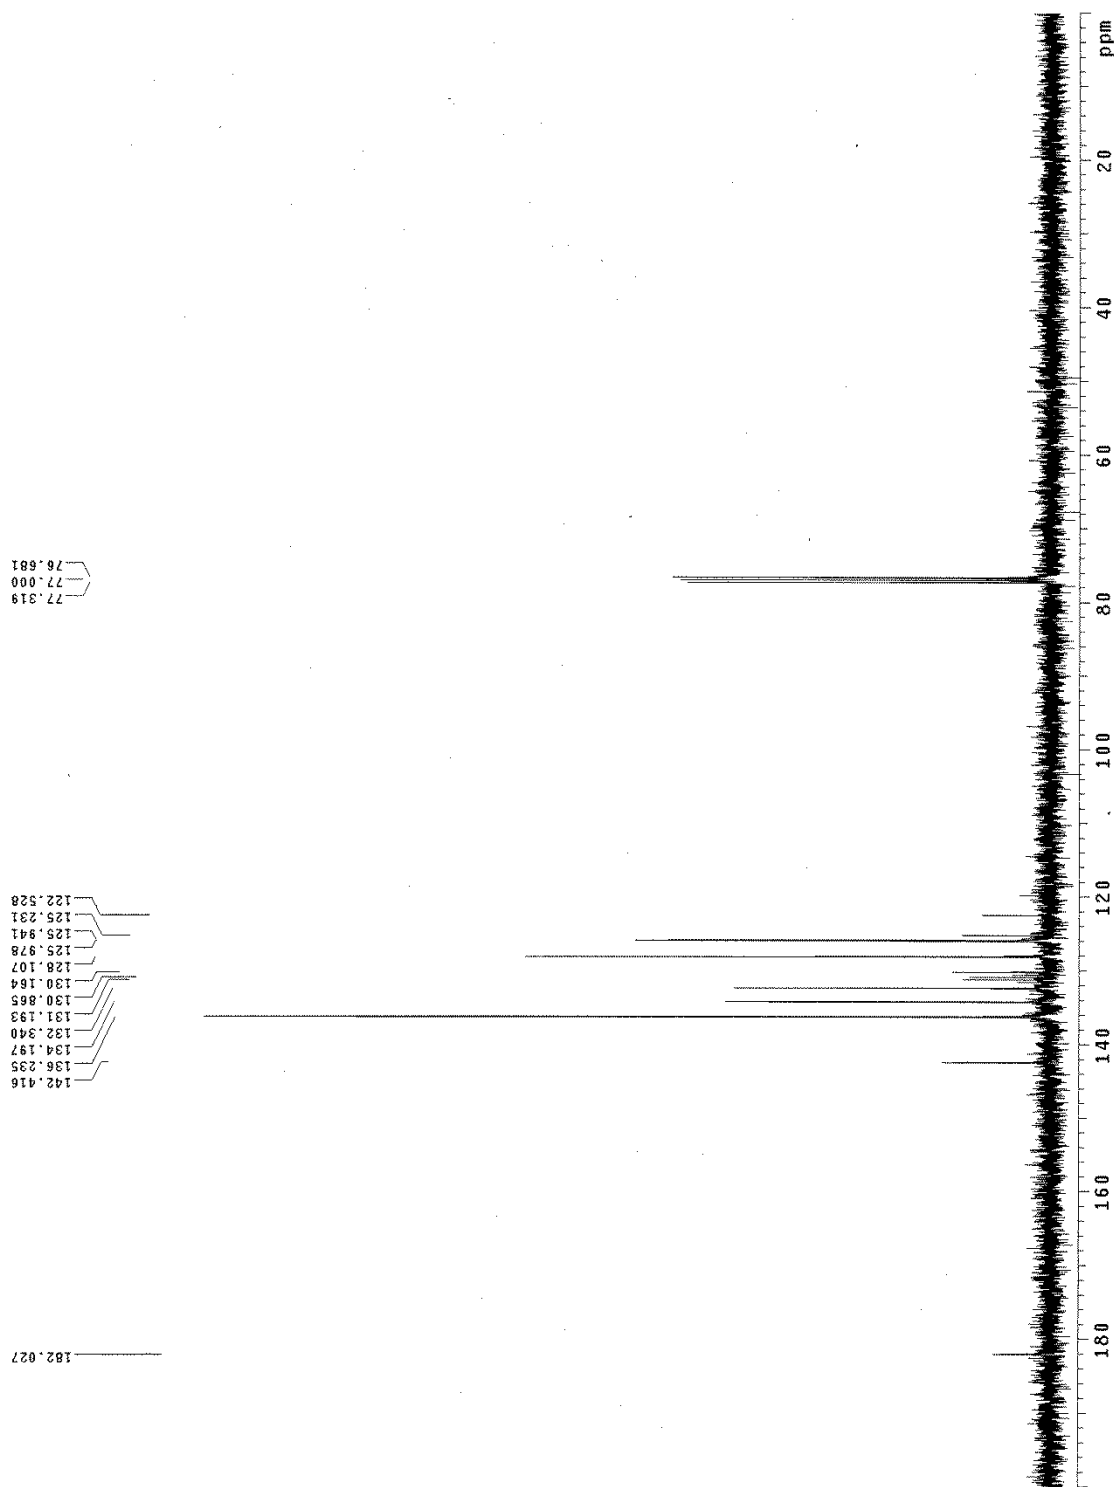

***Se*-4-(Trifluoromethyl)phenyl thiophene-2-carboselenoate (3h)**

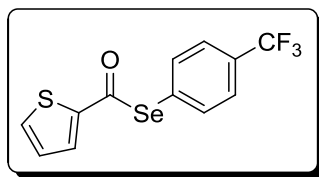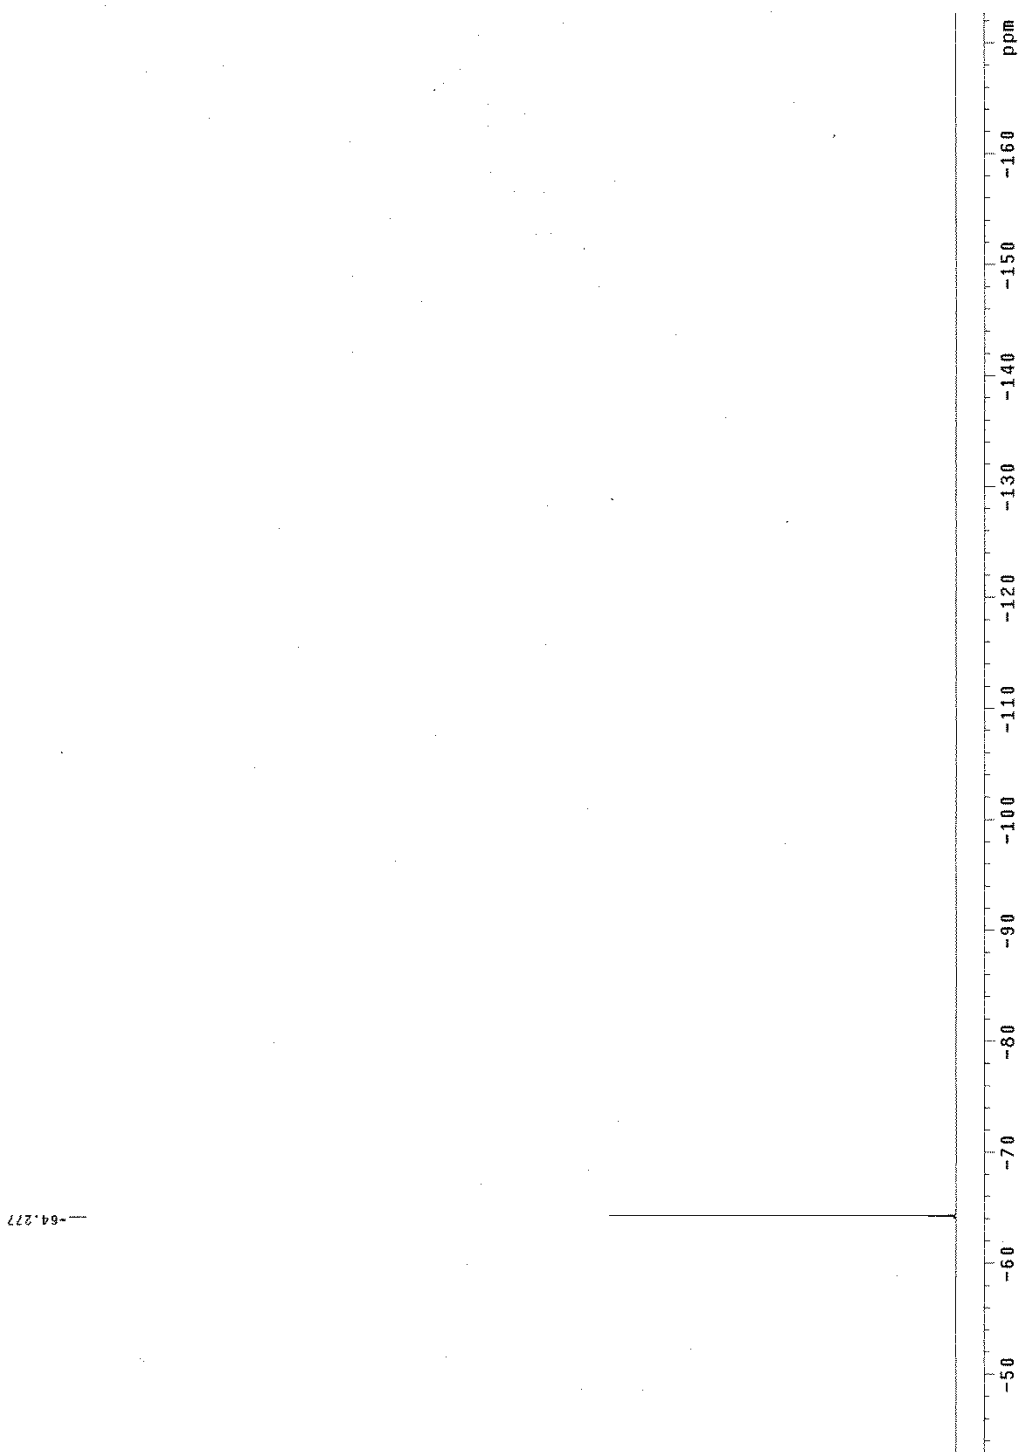

***Se*-4-(Trifluoromethyl)phenyl furan-2-carboselenoate (3i)**

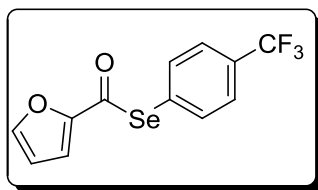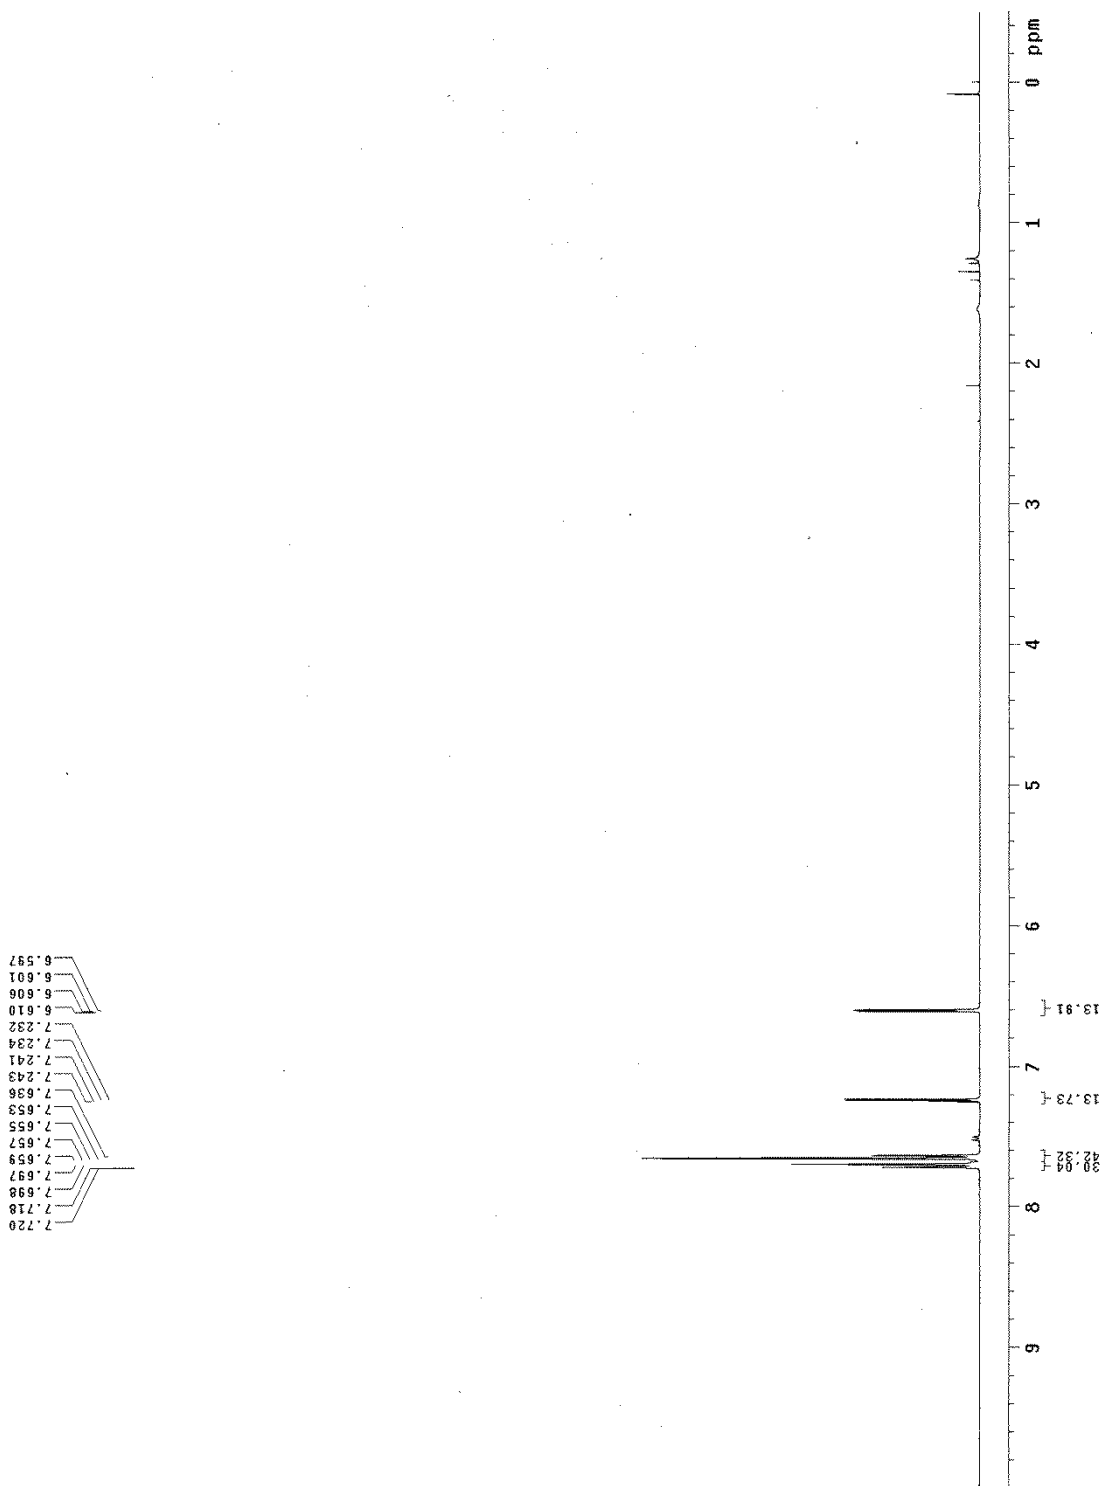

*Se*-4-(Trifluoromethyl)phenyl furan-2-carboselenoate (3i)

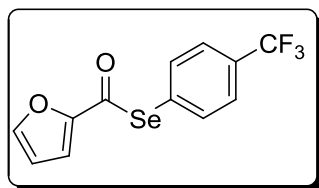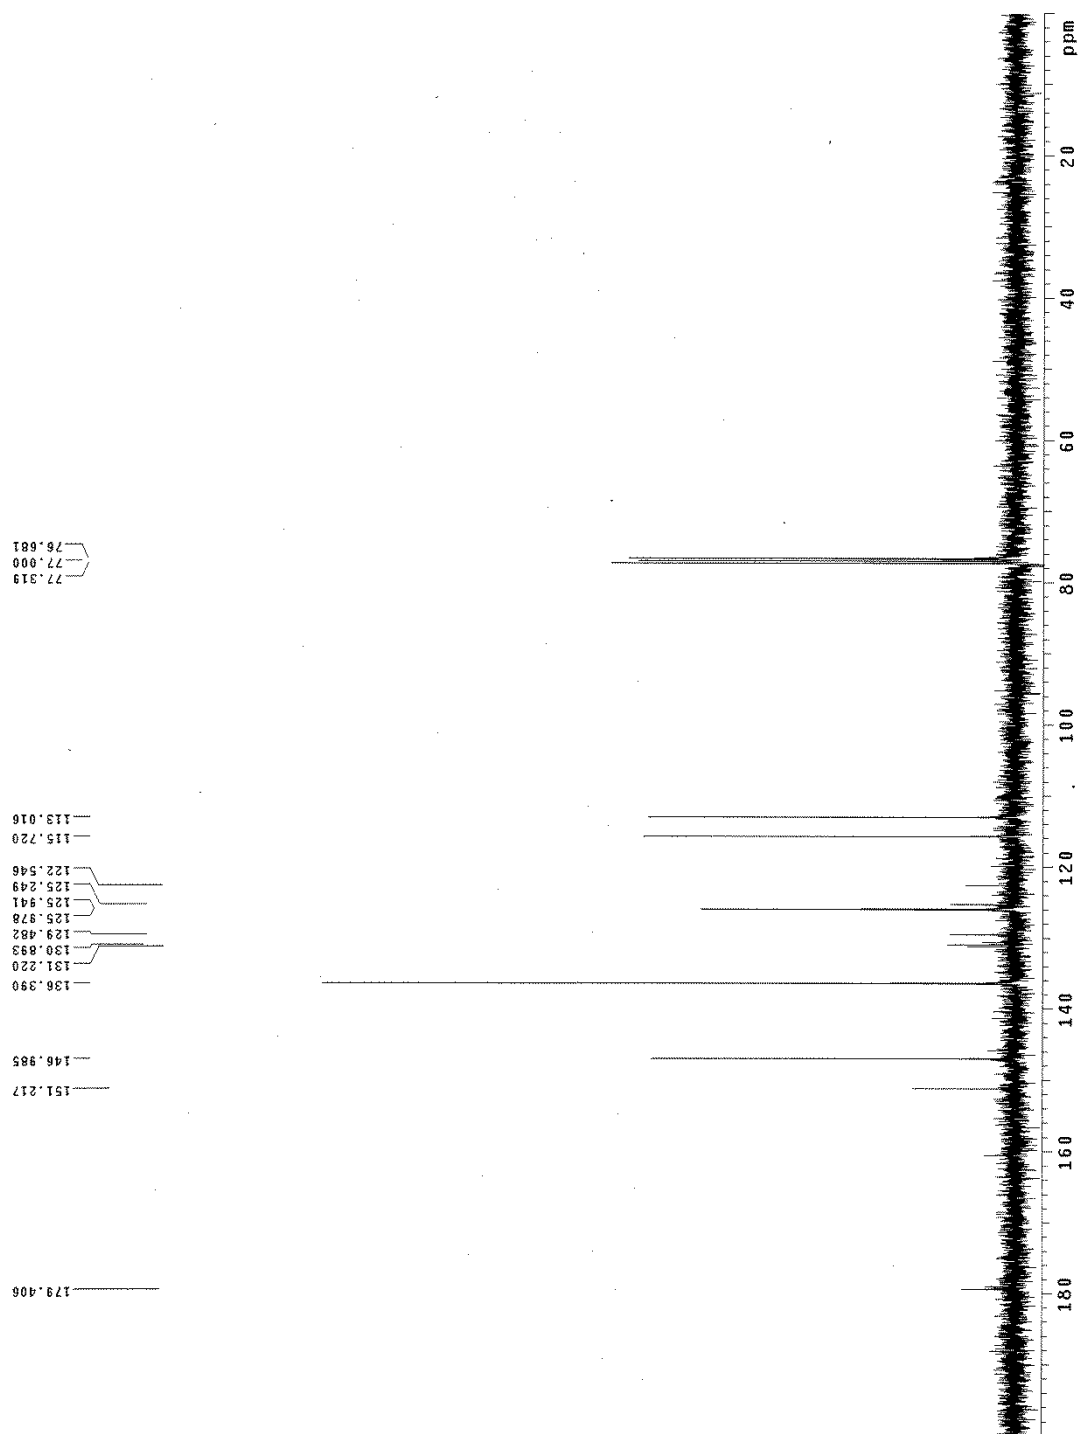

***Se*-4-(Trifluoromethyl)phenyl furan-2-carboselenoate (3i)**



—64.226

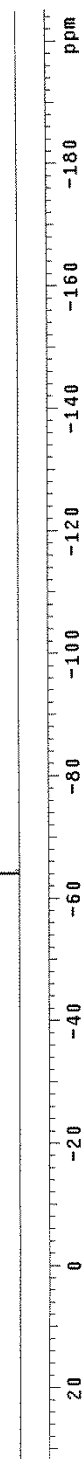

***Se*-4-(Trifluoromethyl)phenyl 4-chlorobenzoselenoate (3j)**

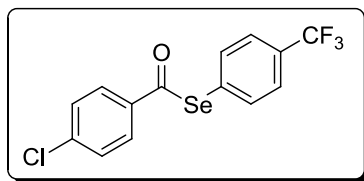

7.448  
7.449  
7.450  
7.469  
7.471  
7.645  
7.665  
7.691  
7.712  
7.834  
7.835  
7.836  
7.855  
7.857

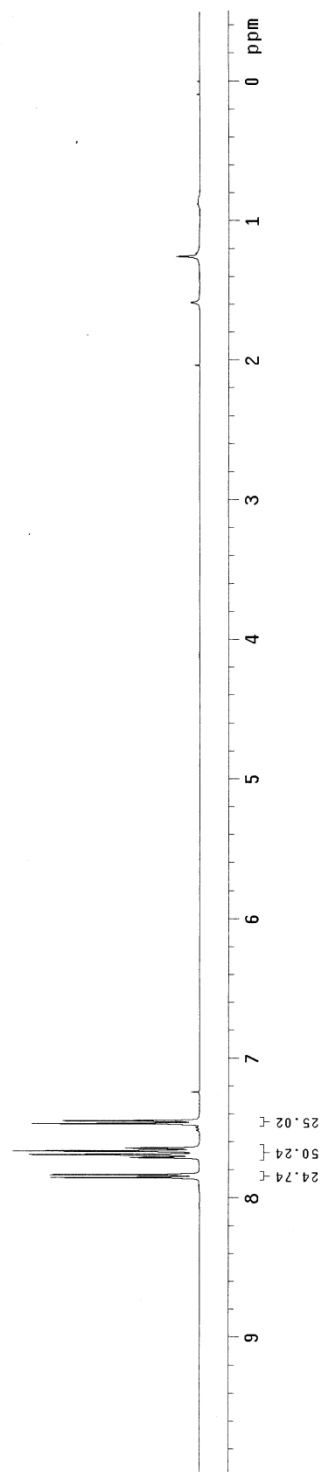

***Se*-4-(Trifluoromethyl)phenyl 4-chlorobenzoselenoate (3j)**

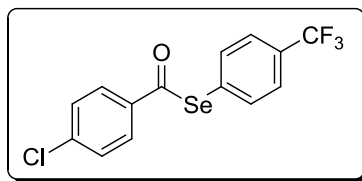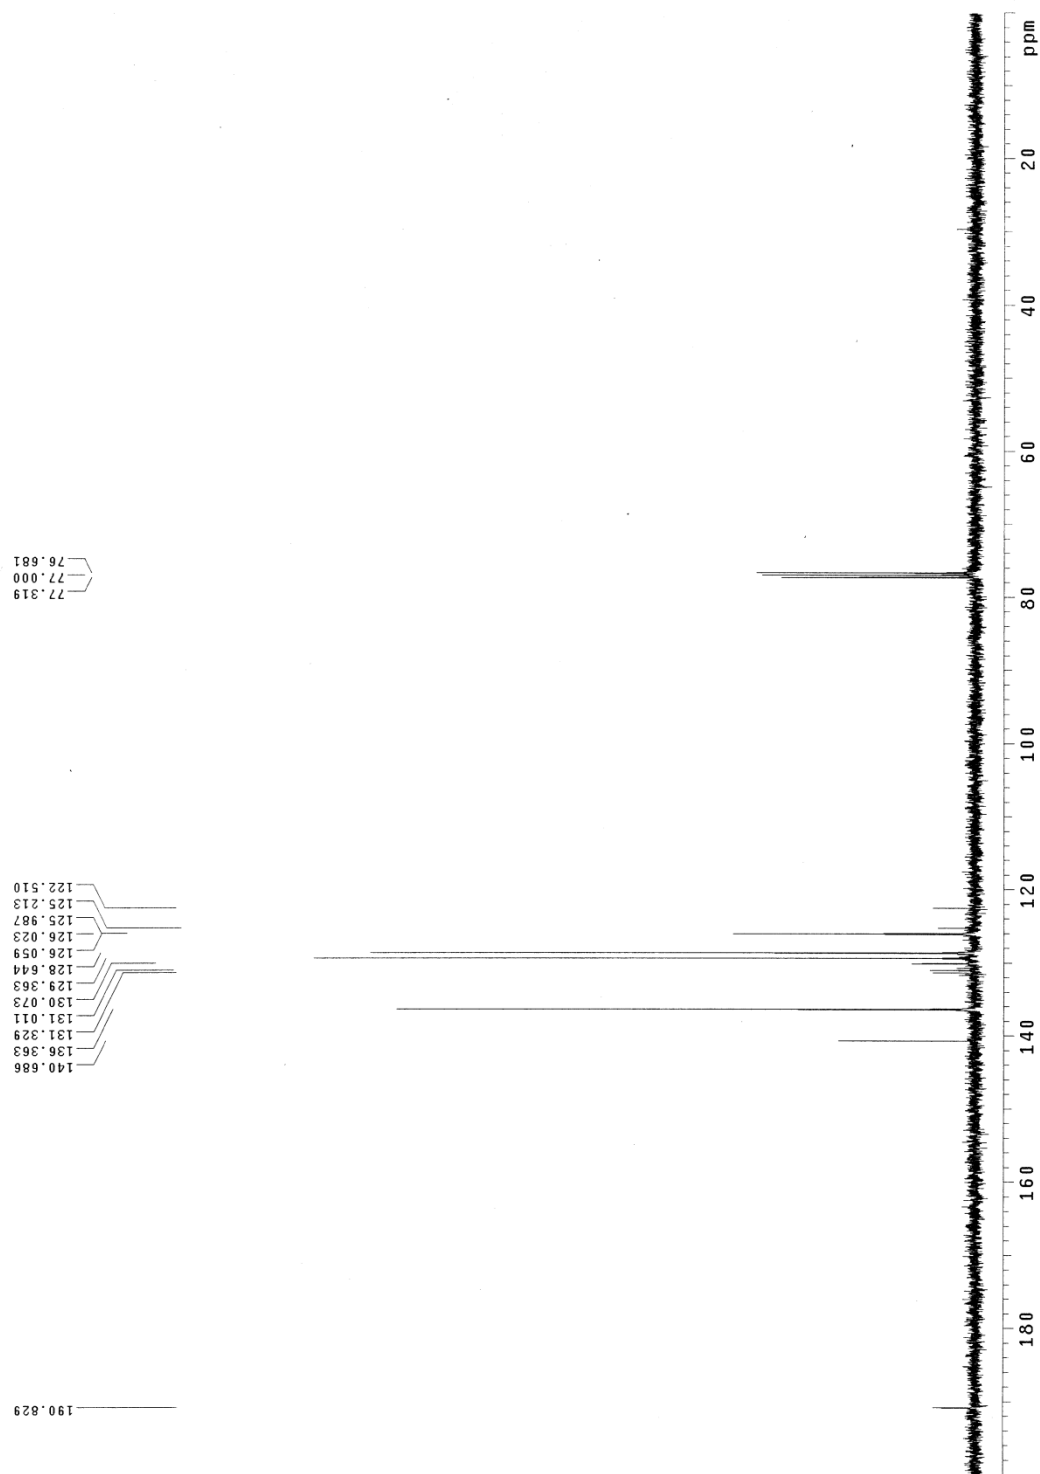



***Se*-4-(Trifluoromethyl)phenyl 4-chlorobenzoselenoate (3j)**



—64.204

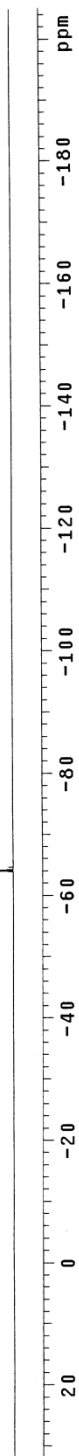

***Se*-4-(Trifluoromethyl)phenyl 4-methoxybenzoselenoate (3k)**

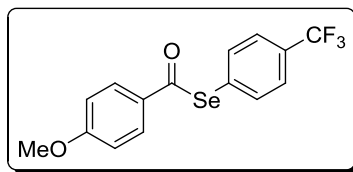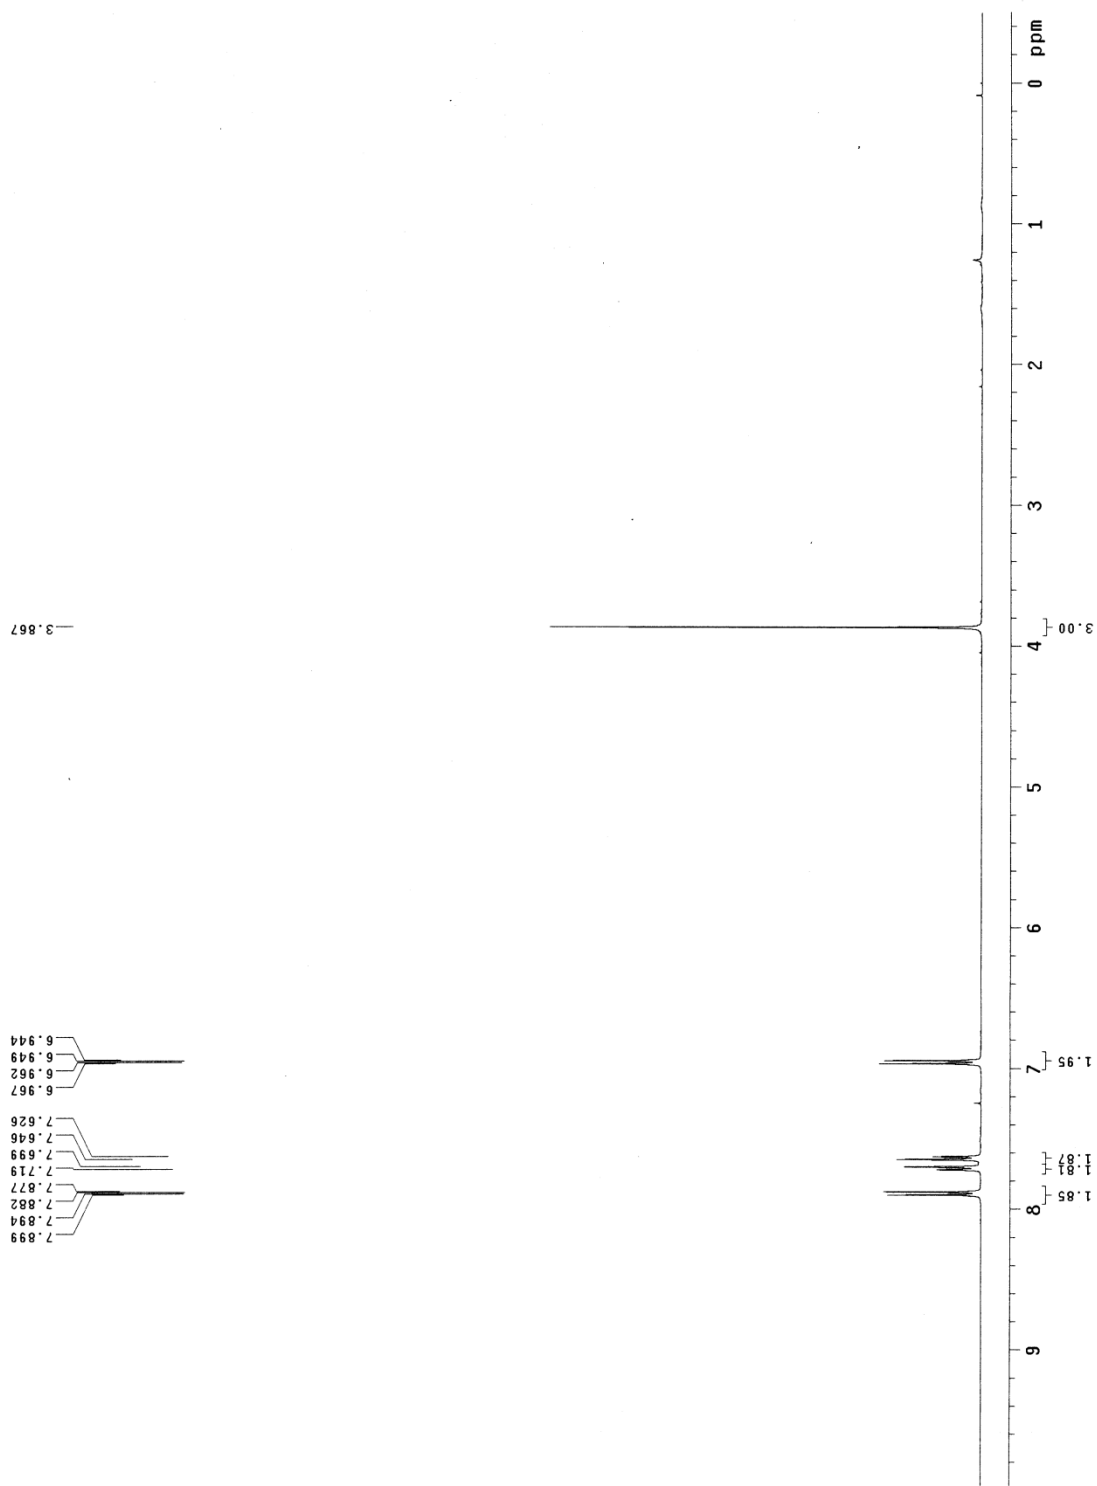

***Se*-4-(Trifluoromethyl)phenyl 4-methoxybenzoselenoate (3k)**

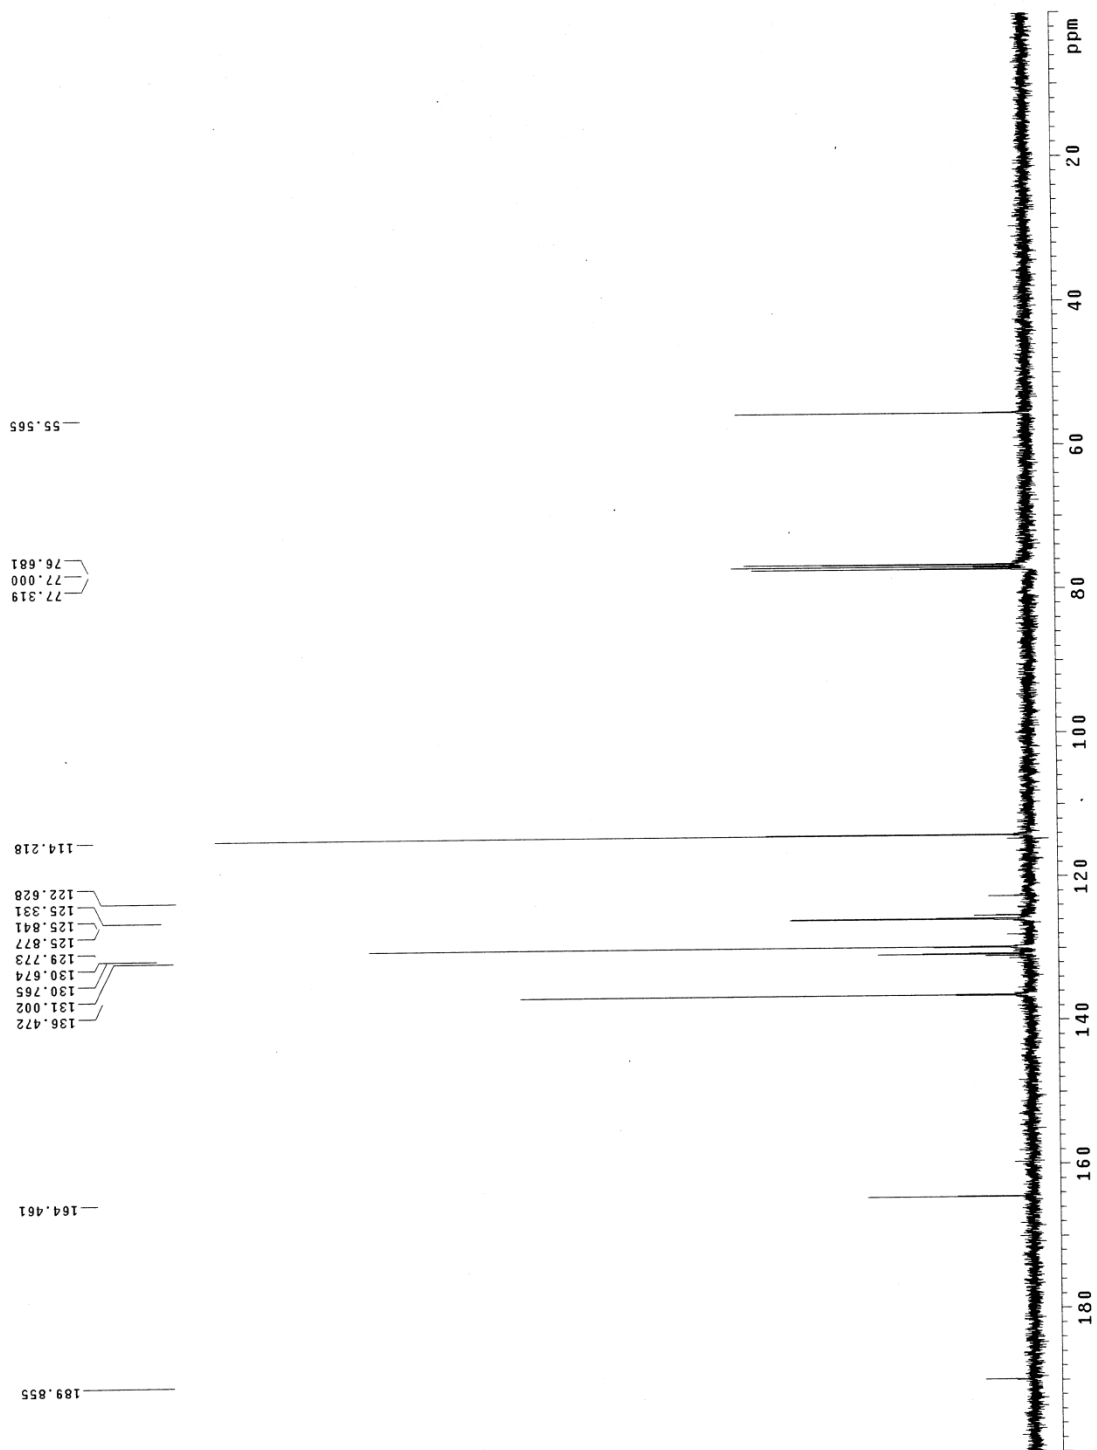

***Se*-4-(Trifluoromethyl)phenyl 4-methoxybenzoselenoate (3k)**

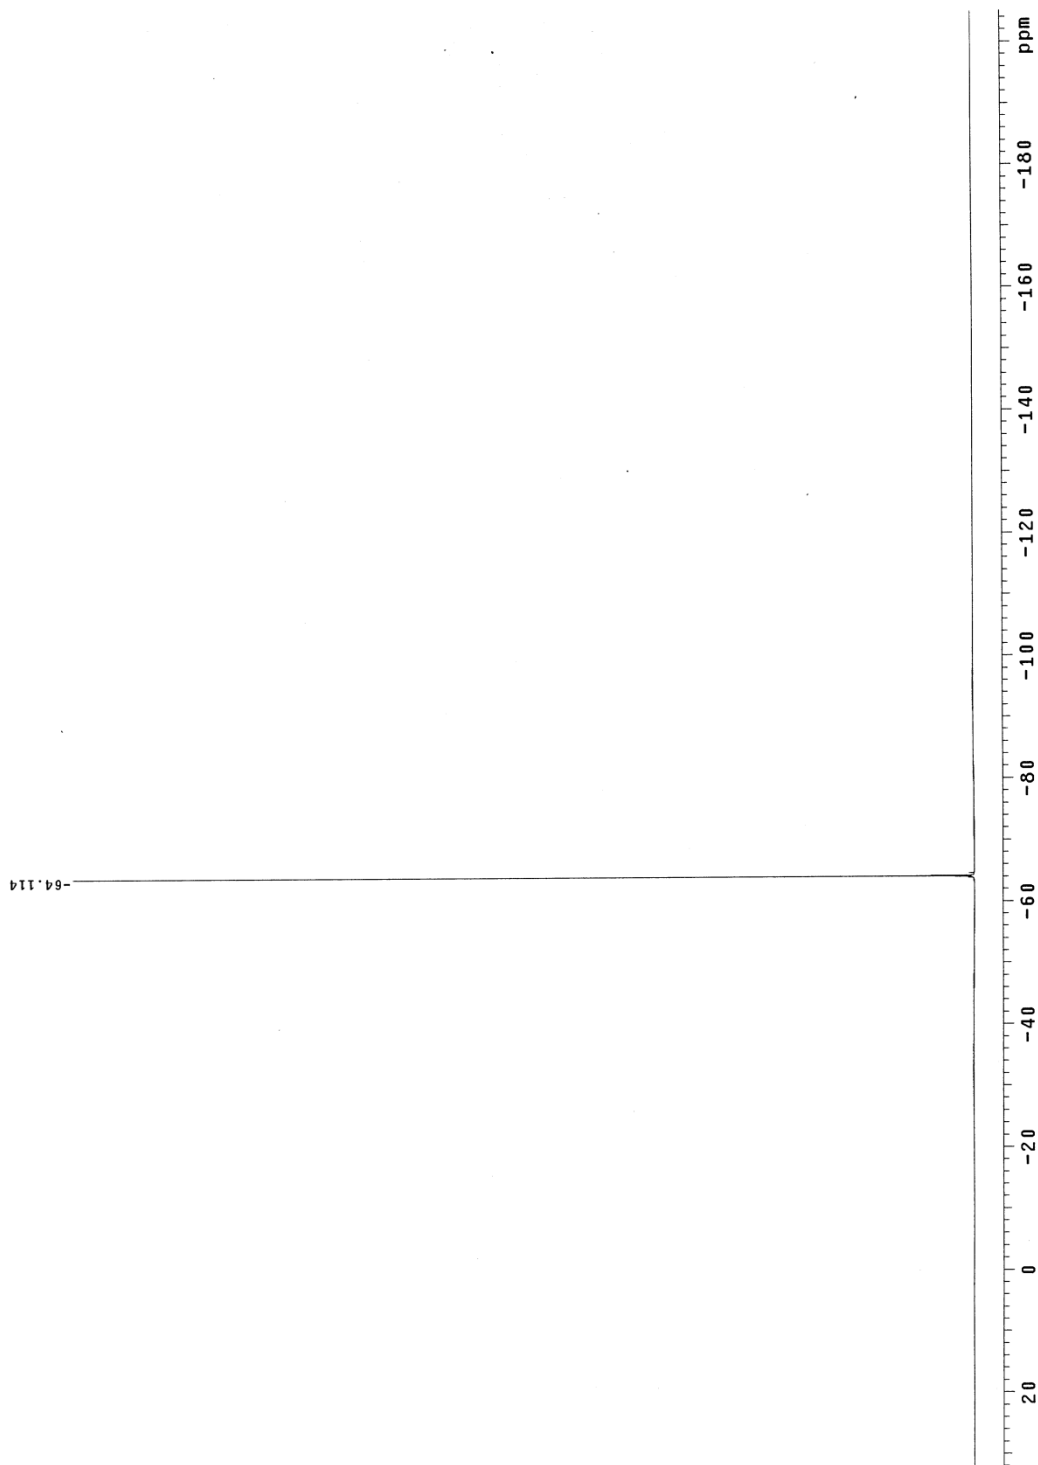

***Se*-4-(Trifluoromethyl)phenyl 3-methylbenzoselenoate (31)**

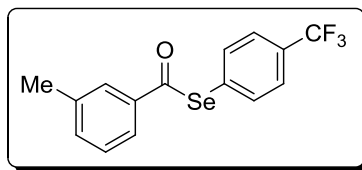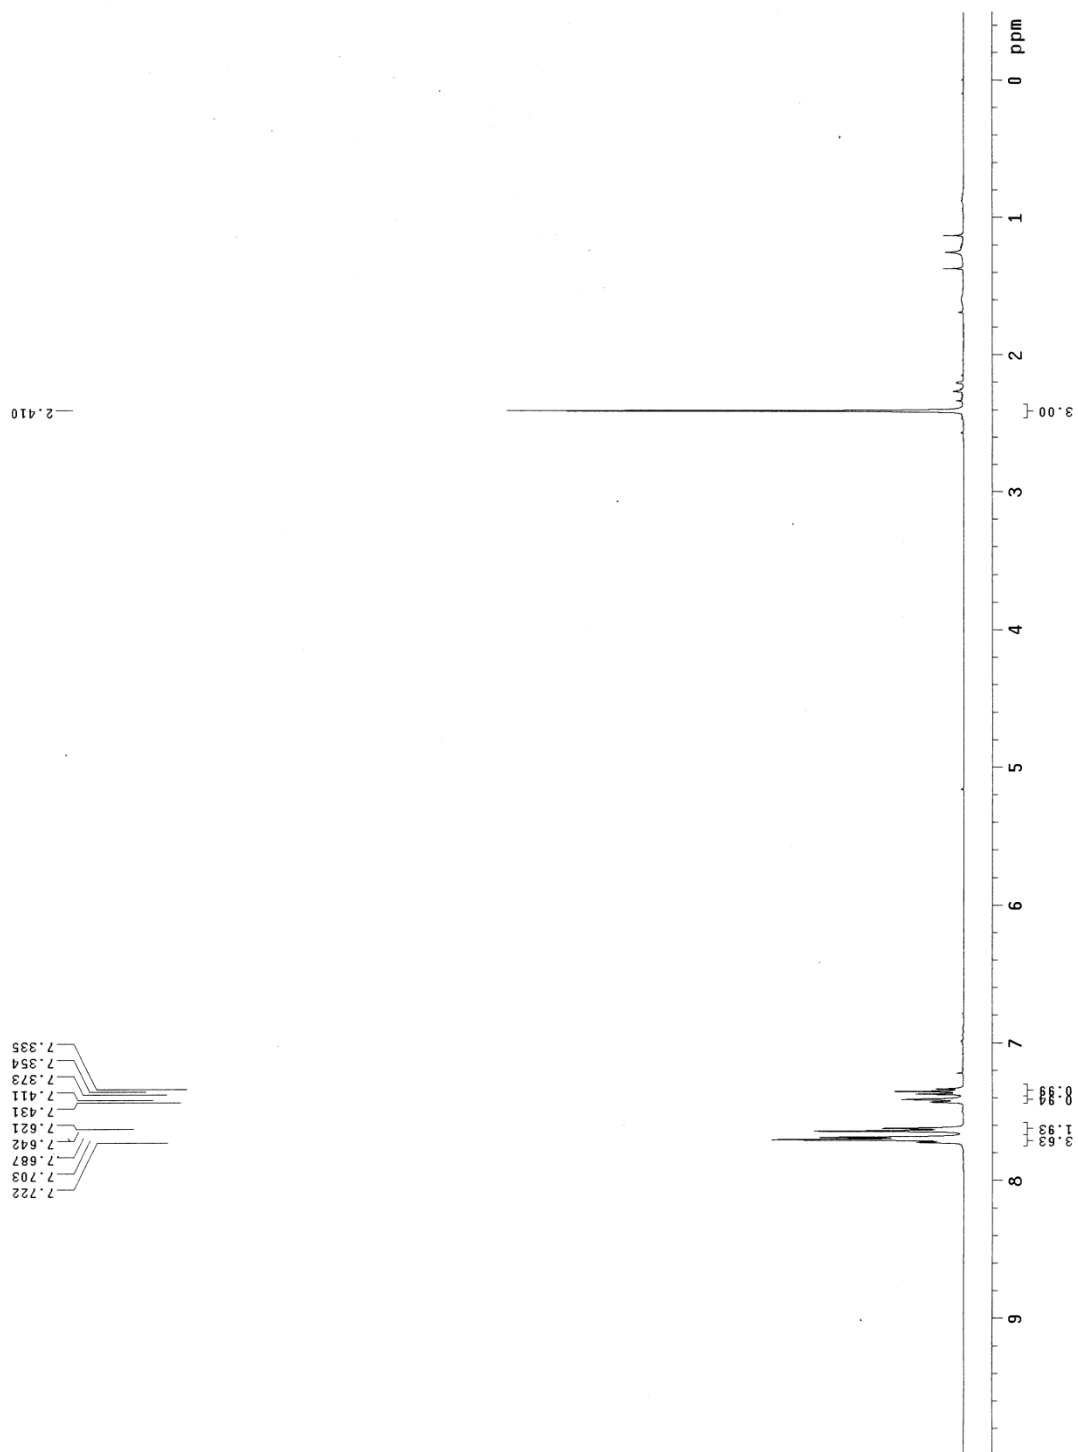

***Se*-4-(Trifluoromethyl)phenyl 3-methylbenzoselenoate (31)**

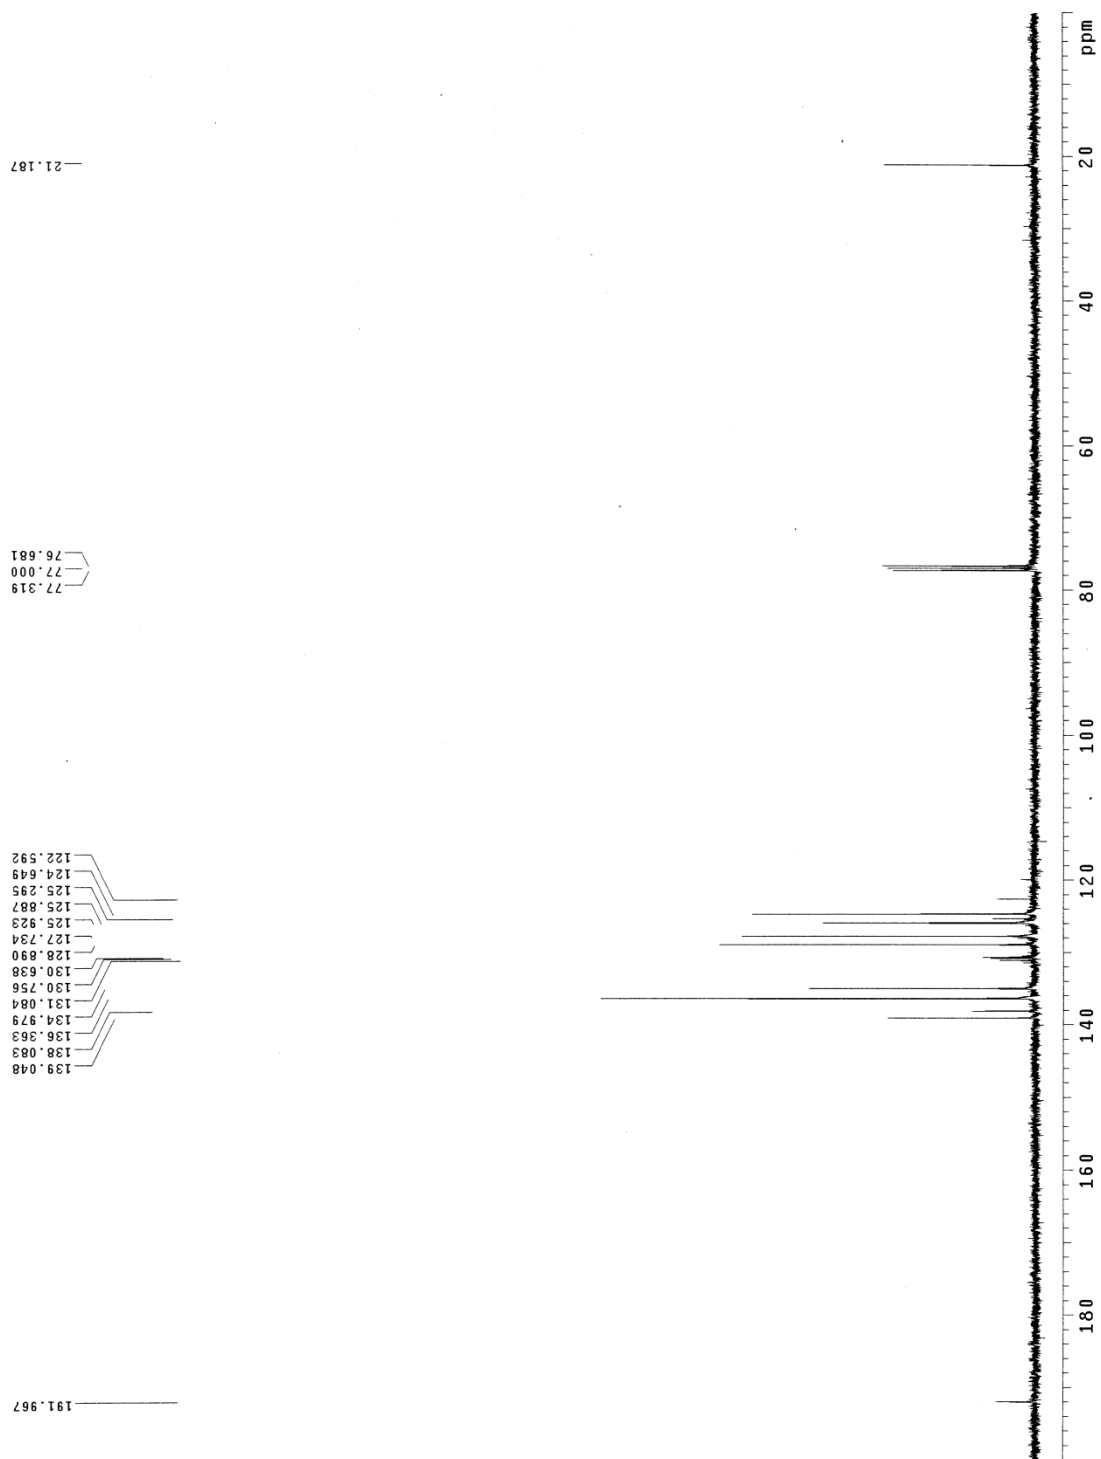

***Se*-4-(Trifluoromethyl)phenyl 3-methylbenzoselenoate (31)**

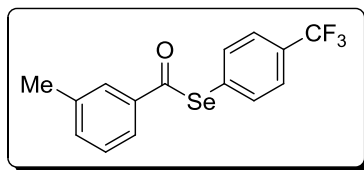

—64.265

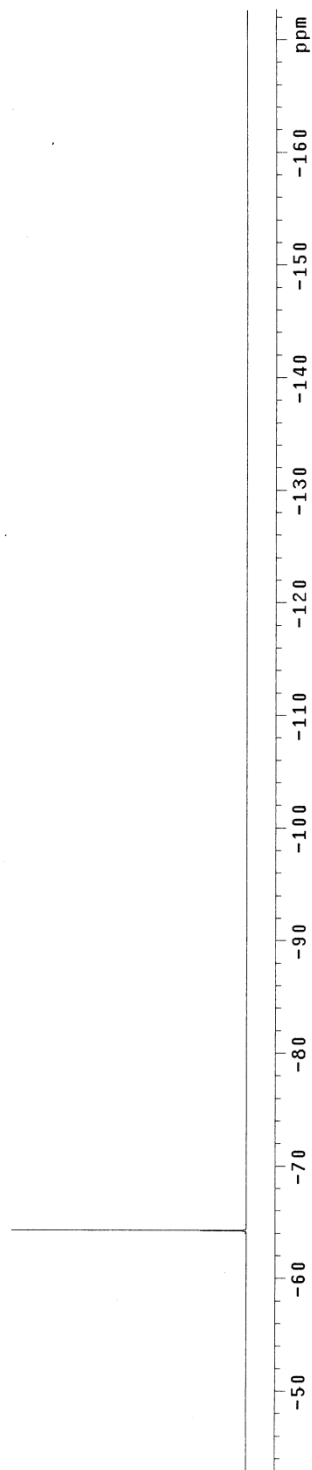

***Se*-Phenyl 4-(diethylamino)benzoselenoate (3m)**

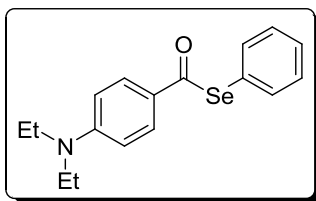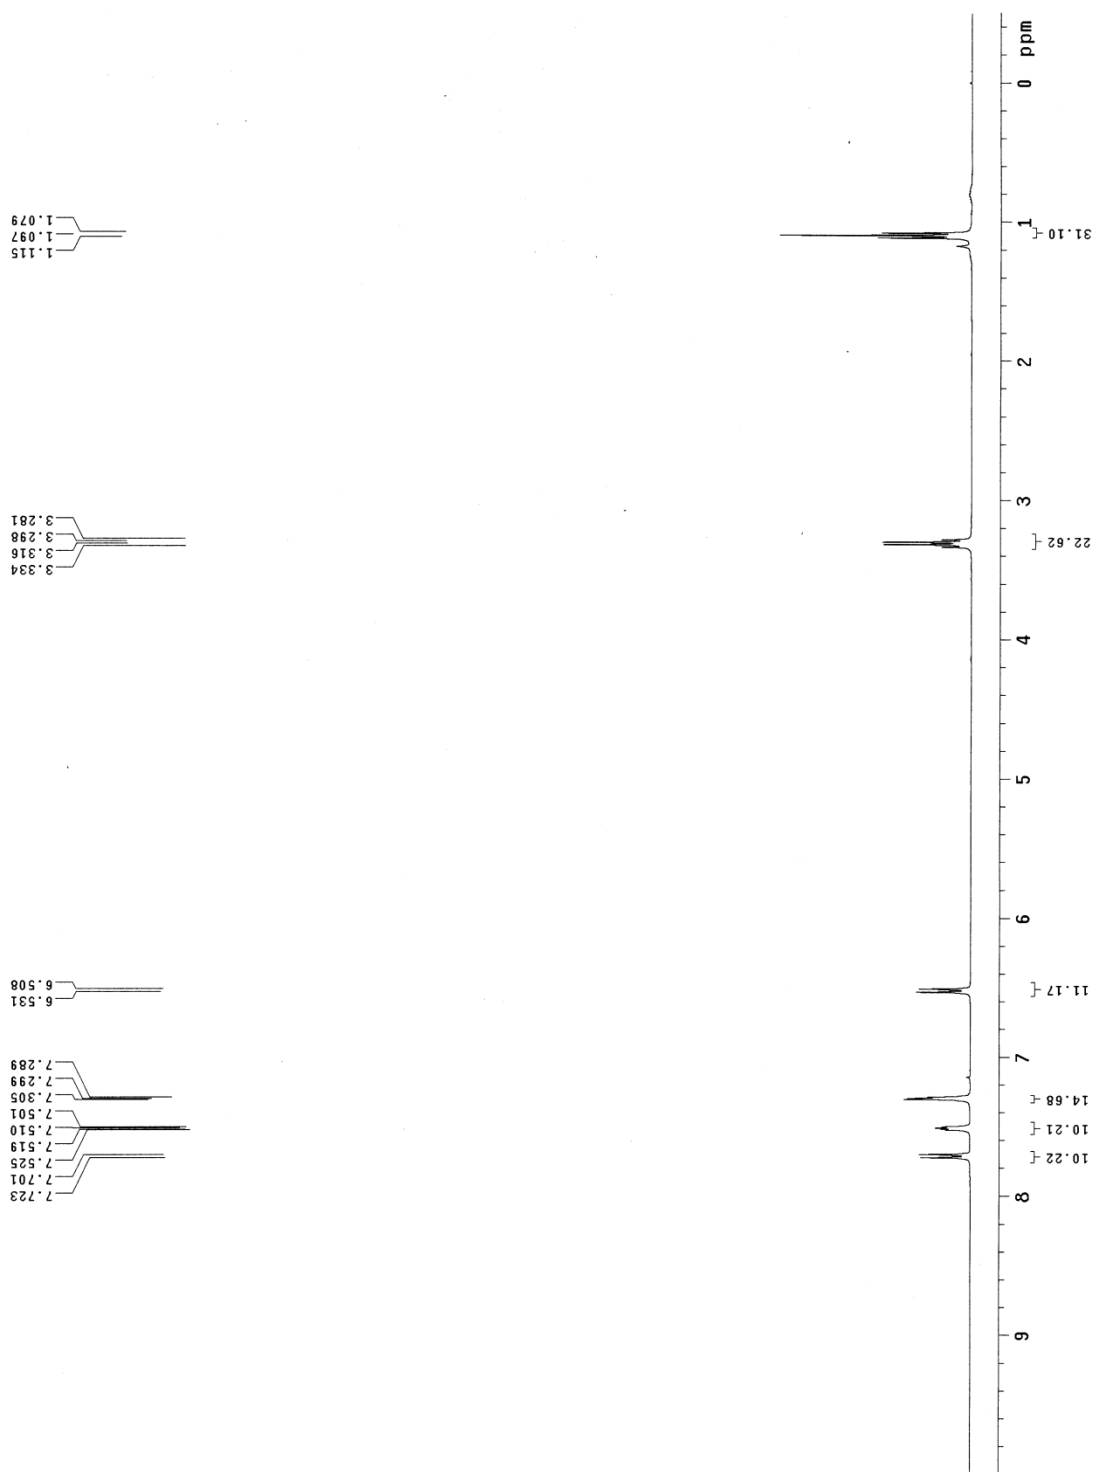



***Se*-Phenyl 4-(diethylamino)benzoselenoate (3m)**

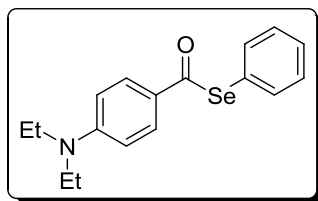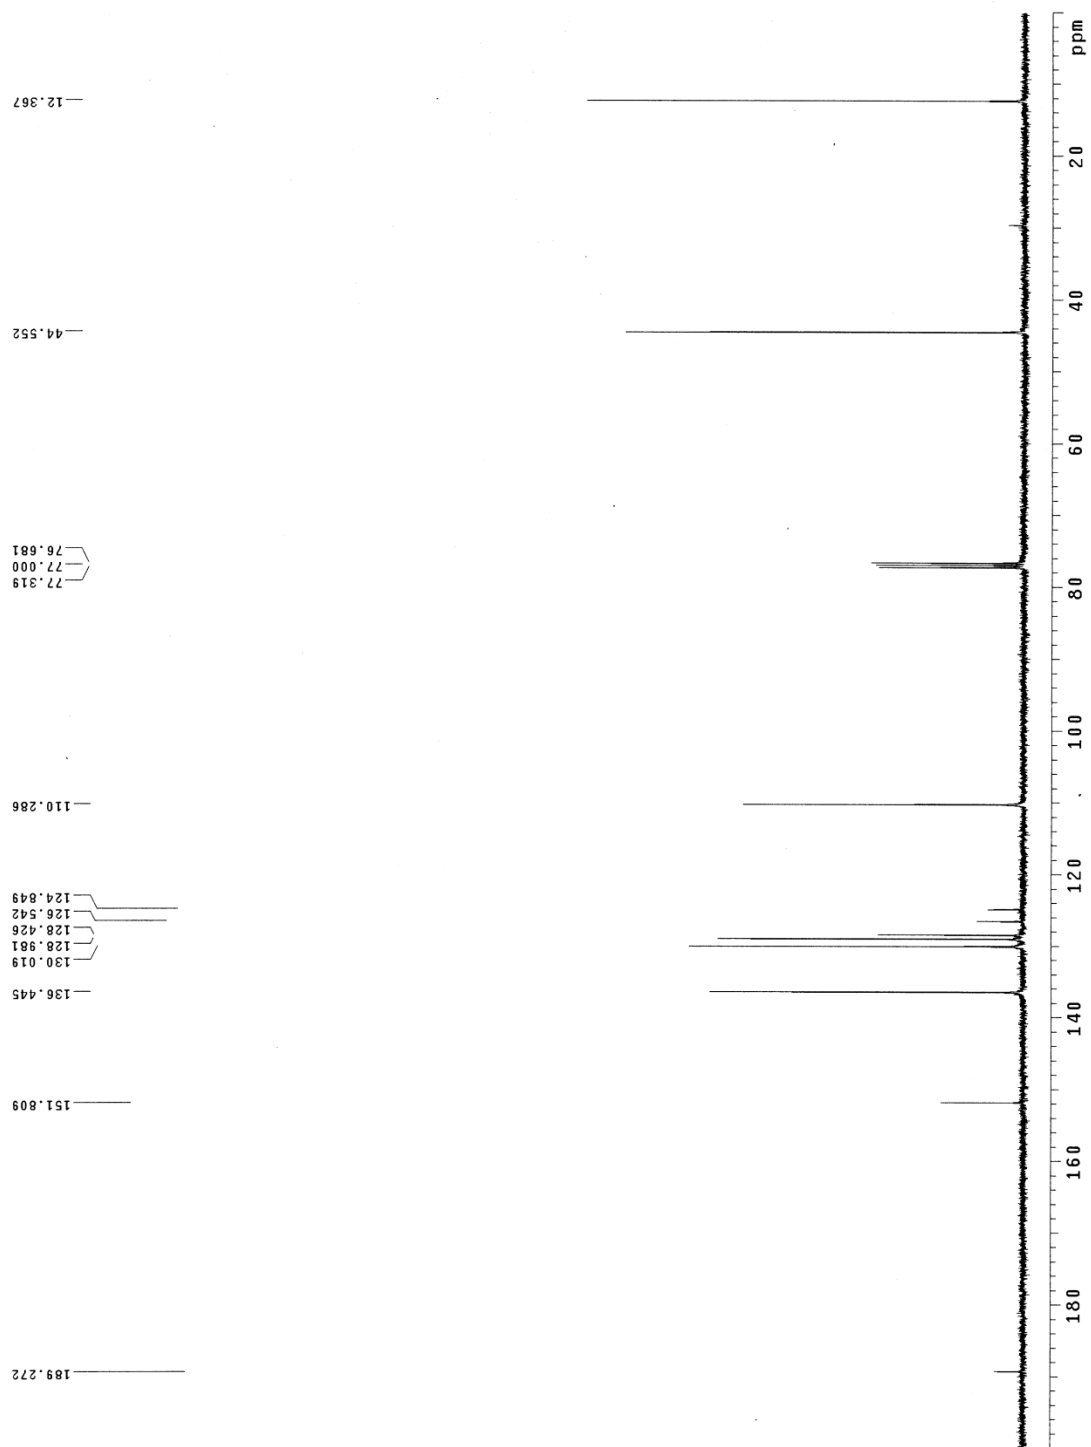

***Se*-Phenyl 4-(dimethylamino)benzoselenoate (3n)**

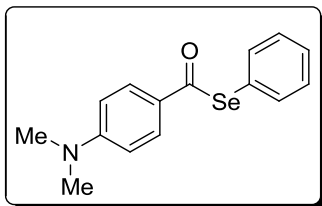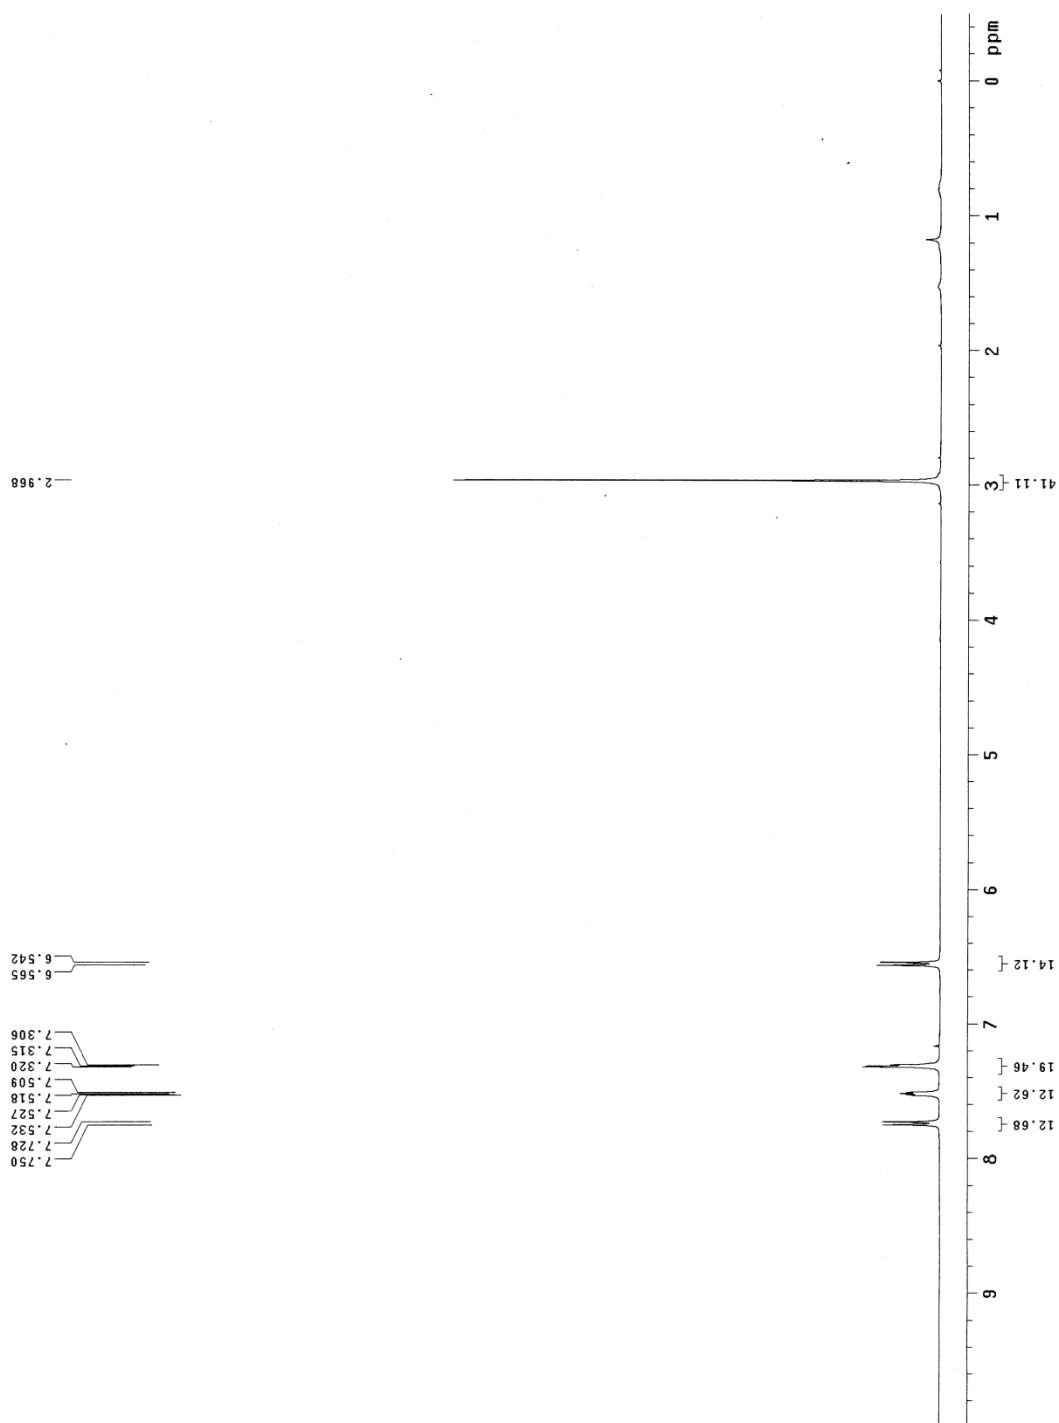

***Se*-Phenyl 4-(dimethylamino)benzoselenoate (3n)**

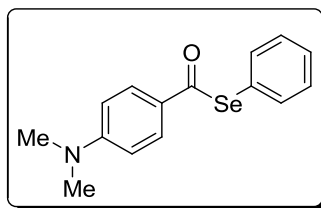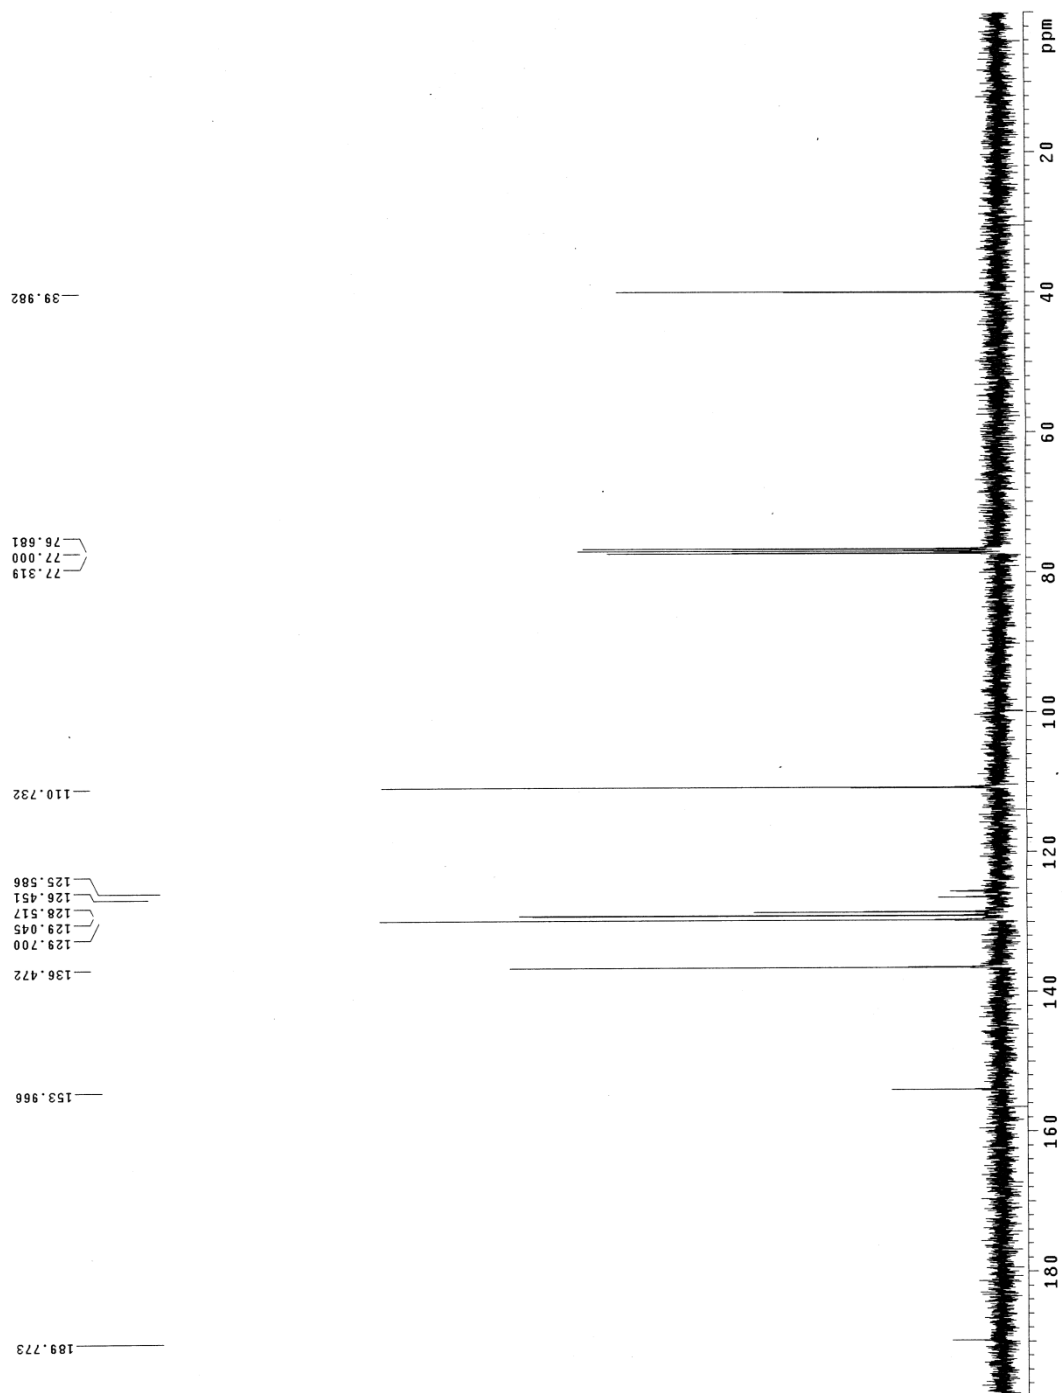

***Se*-Phenyl thiophene-2-carboselenoate (3o)**

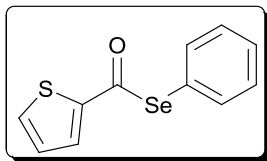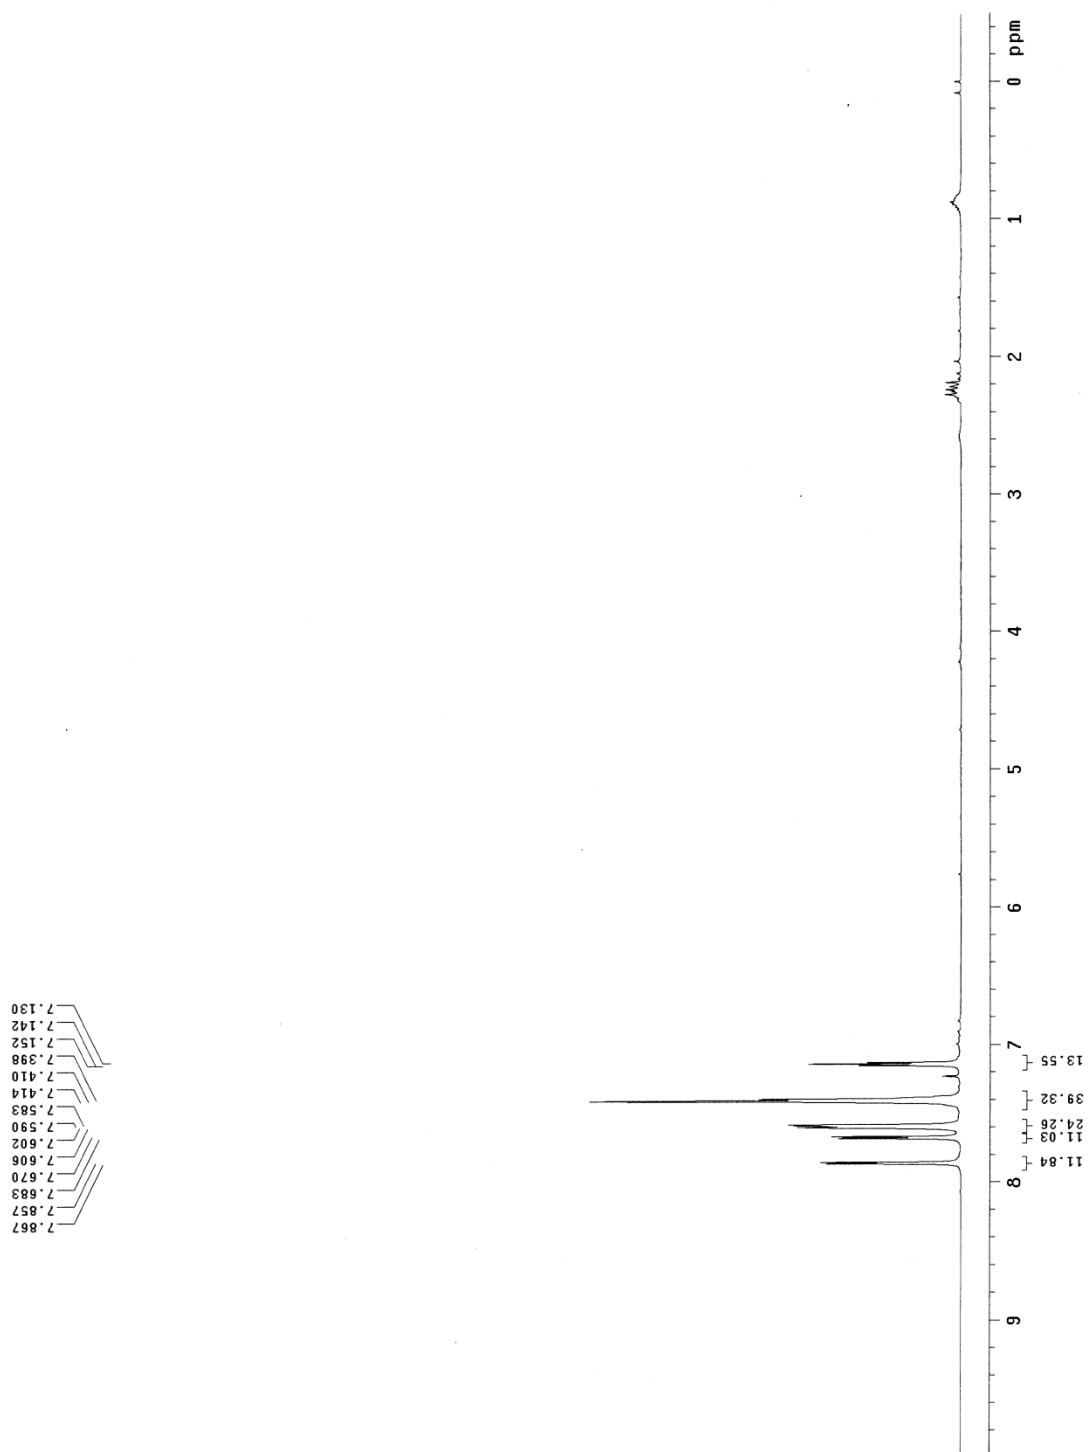

***Se*-Phenyl thiophene-2-carboselenoate (3o)**

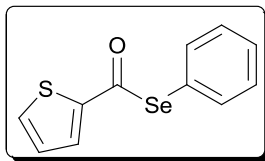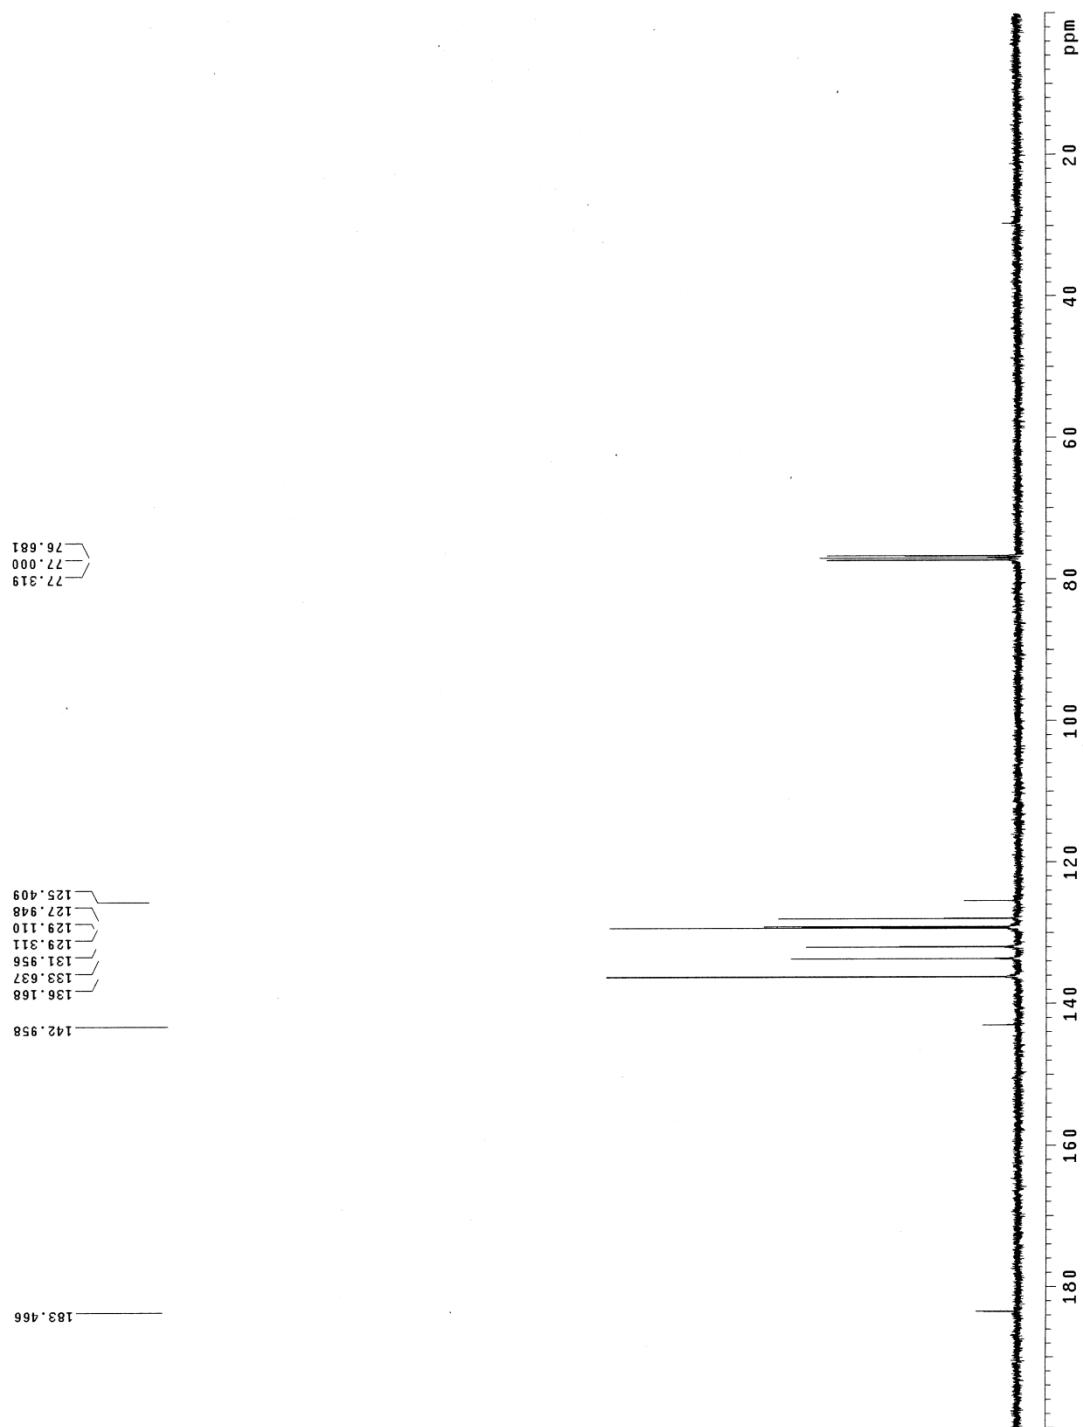

***Se*-Phenyl 3-methylbenzoselenoate (3p)**

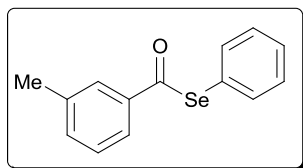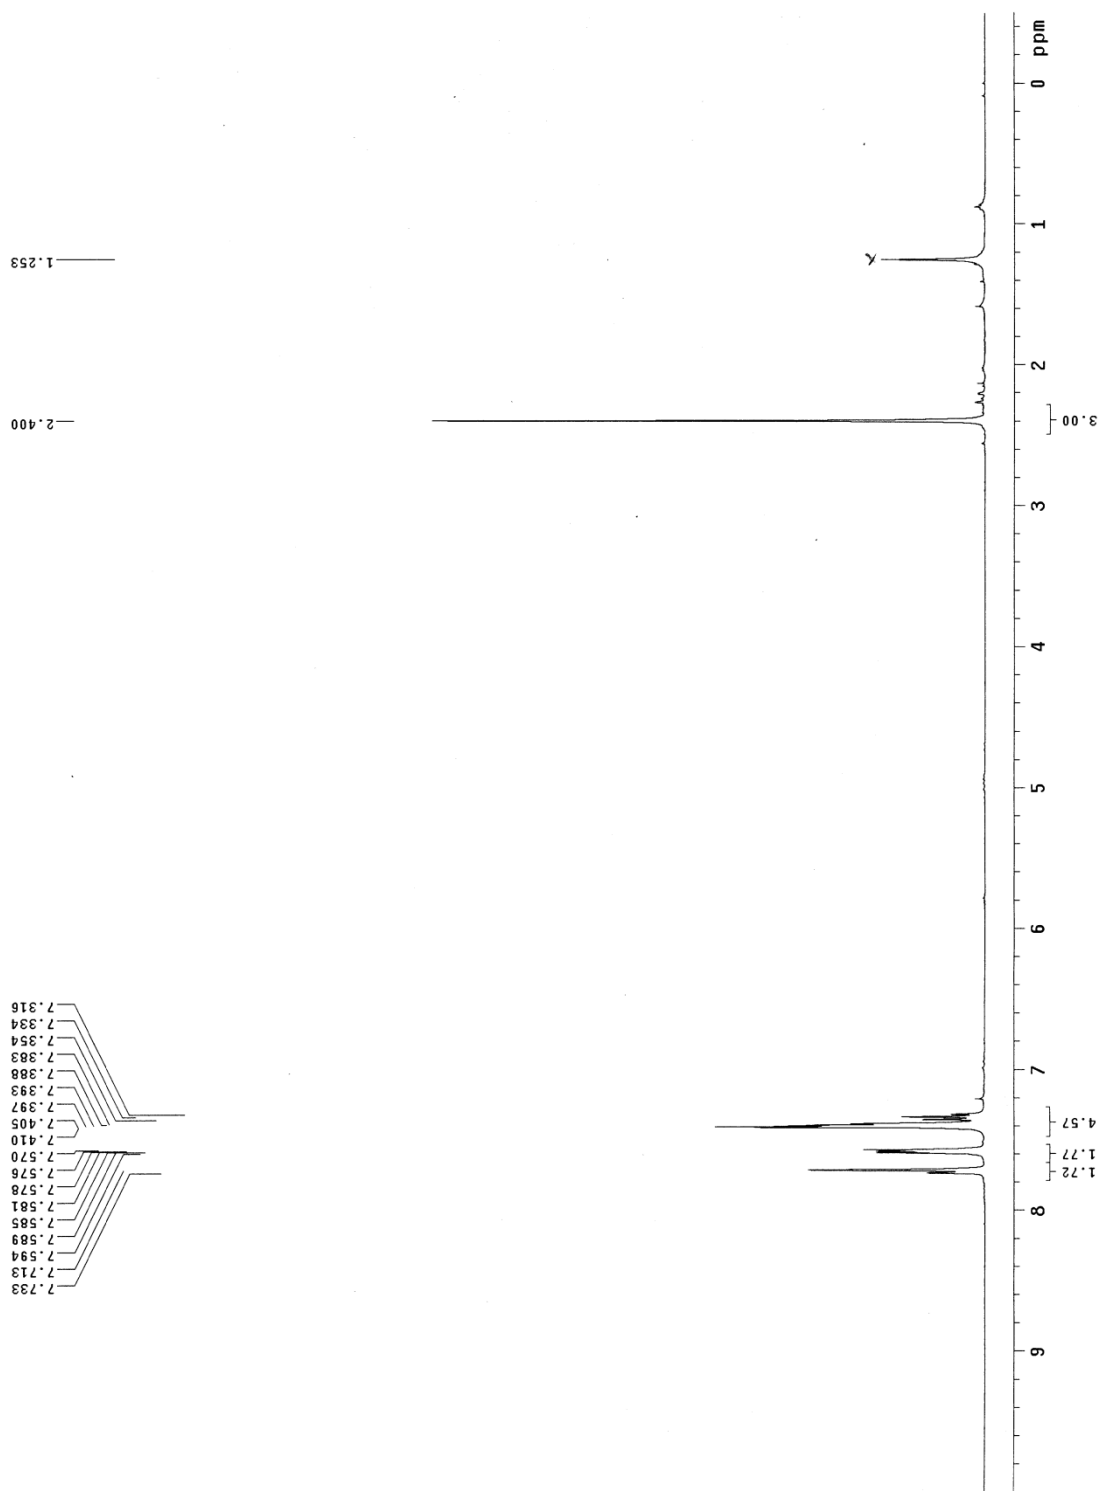

### *Se*-Phenyl 3-methylbenzoselenoate (3p)

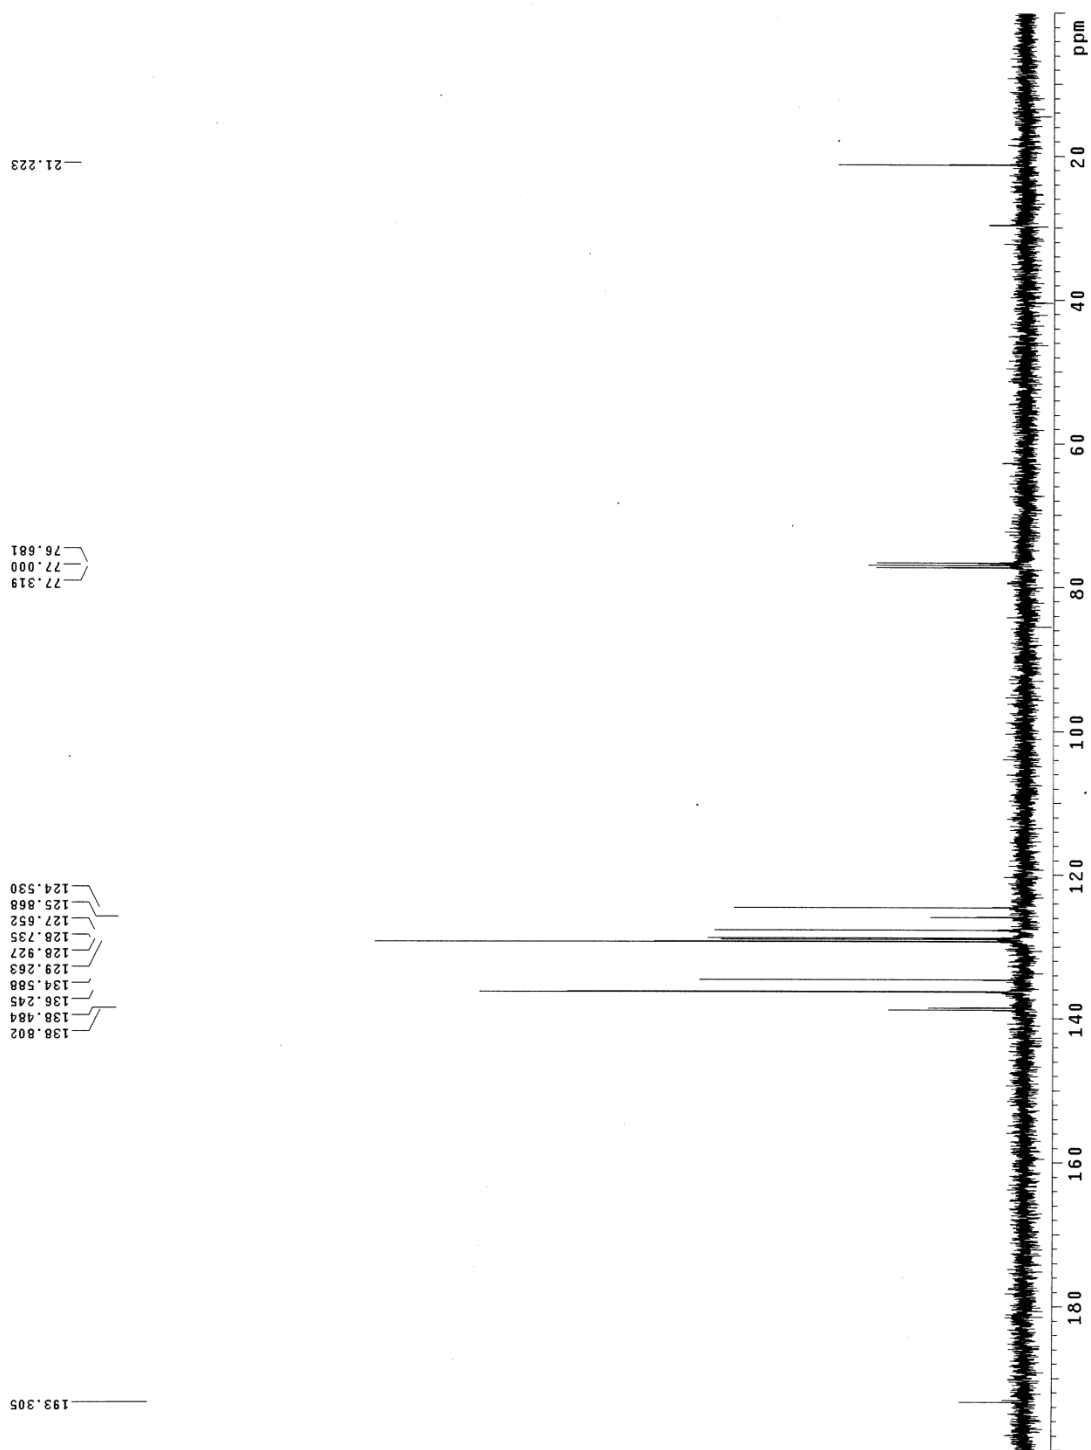

***Se*-4-Methoxyphenyl thiophene-2-carboselenoate (3q)**

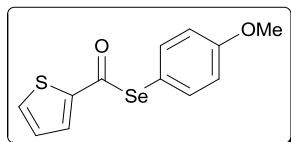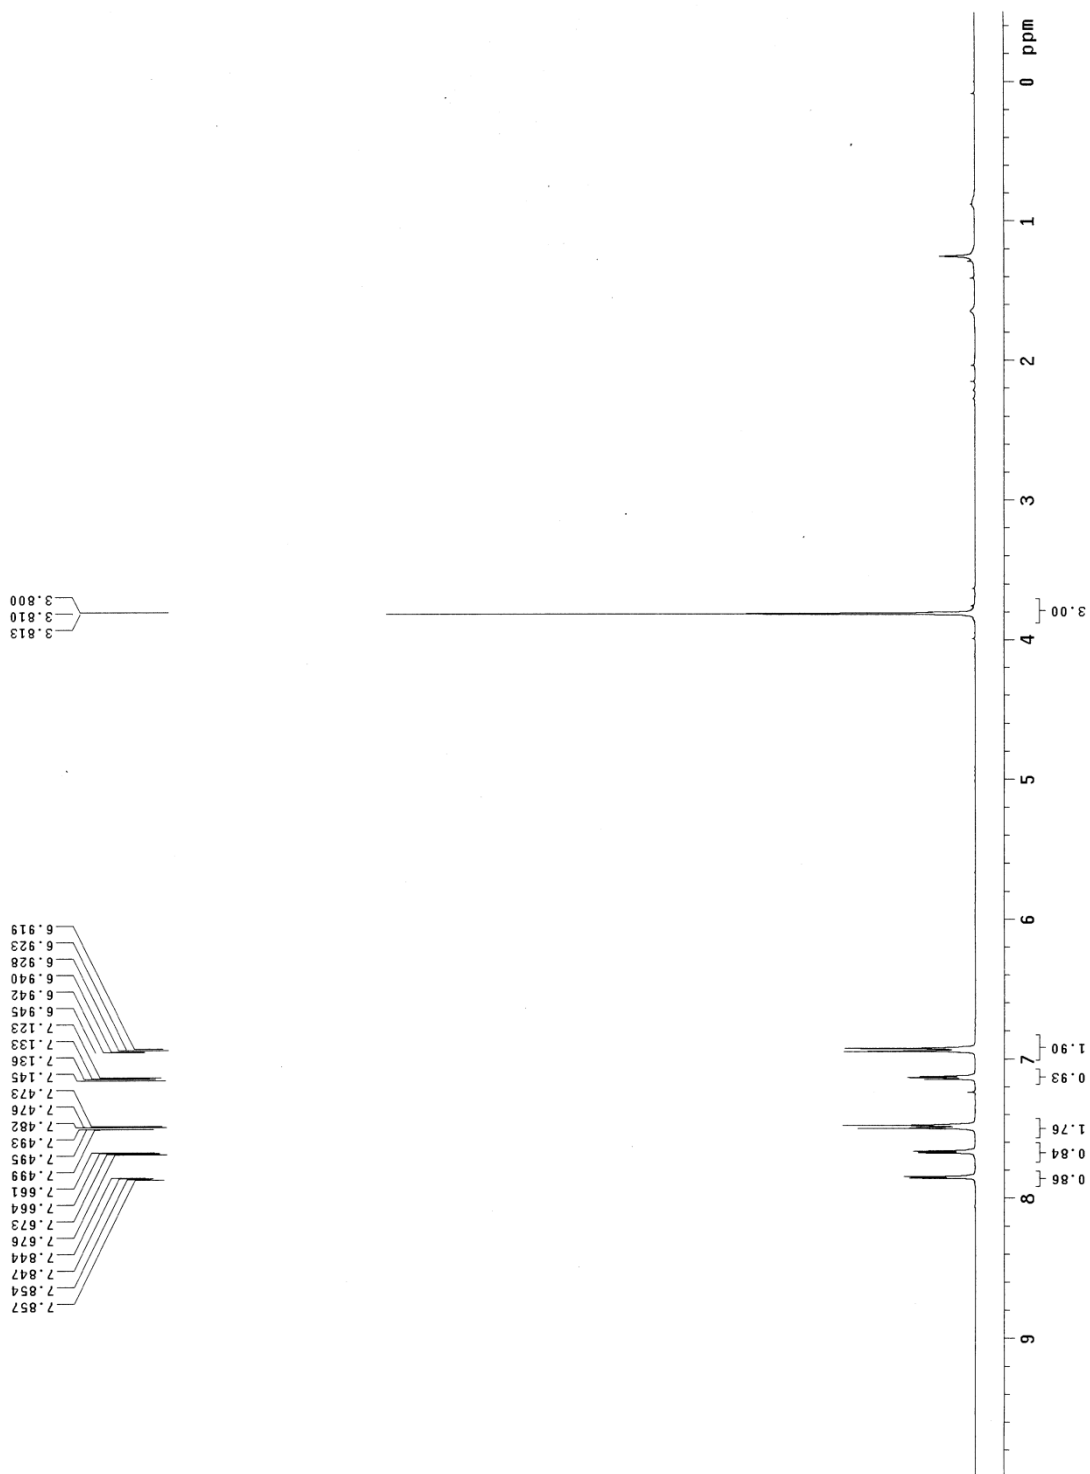



***Se*-4-Methoxyphenyl thiophene-2-carboselenoate (3q)**

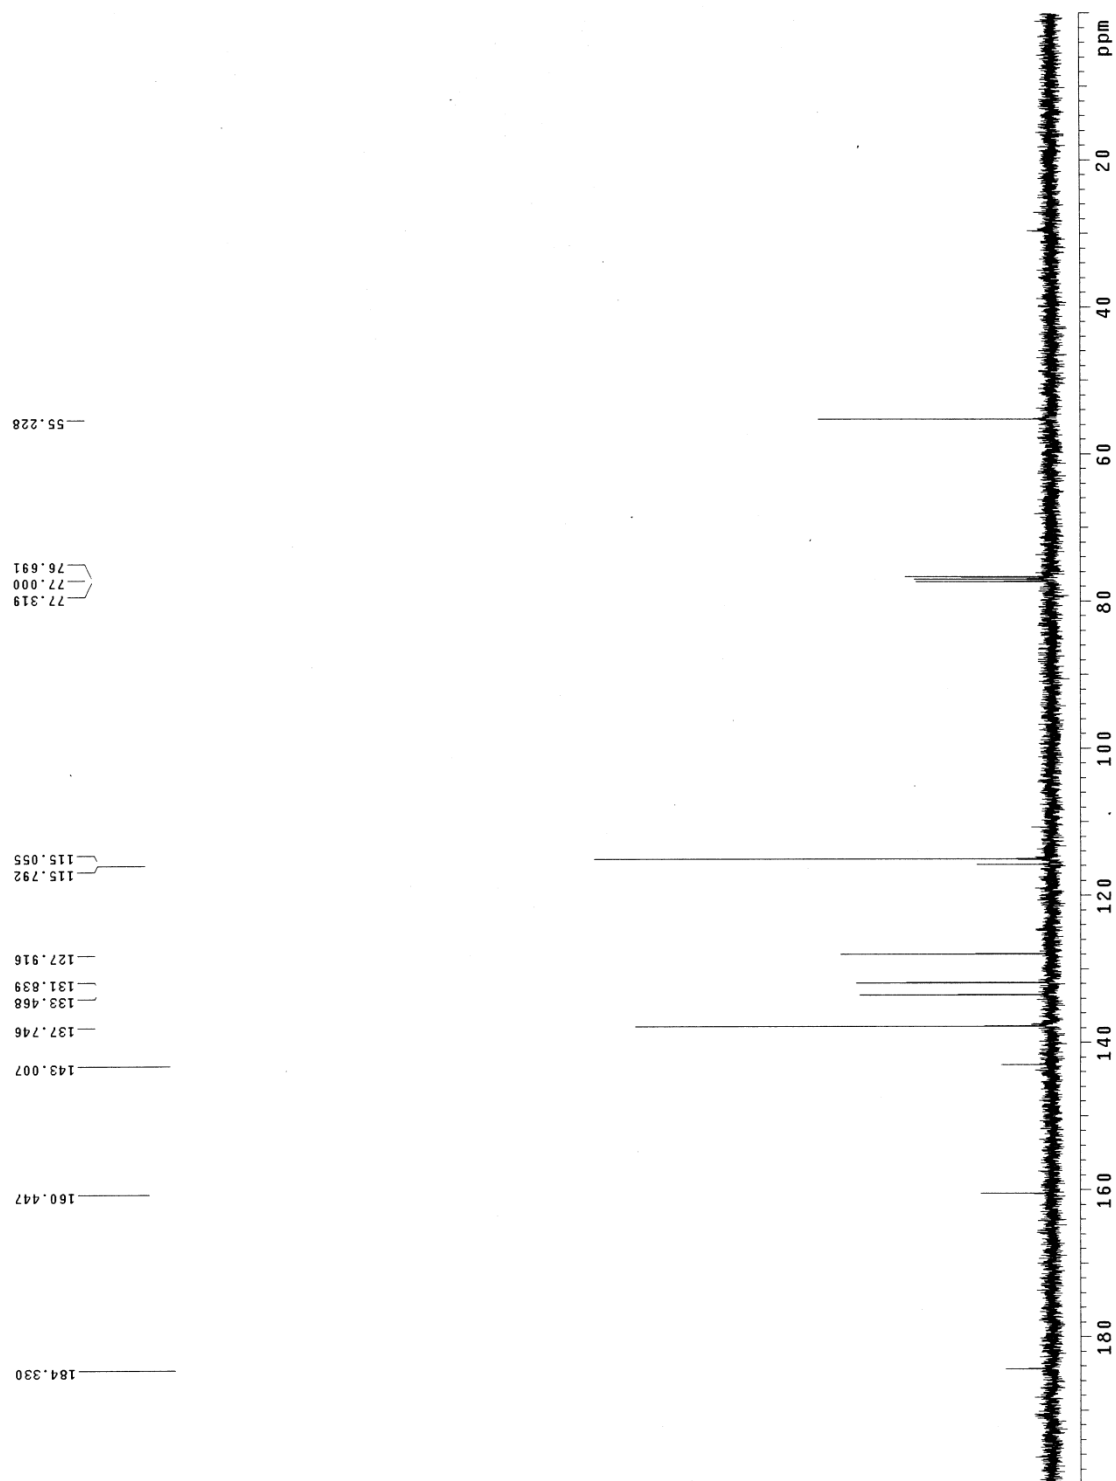

***Se*-4-Methoxyphenyl furan-2-carboselenoate (3r)**

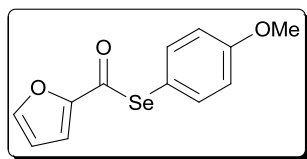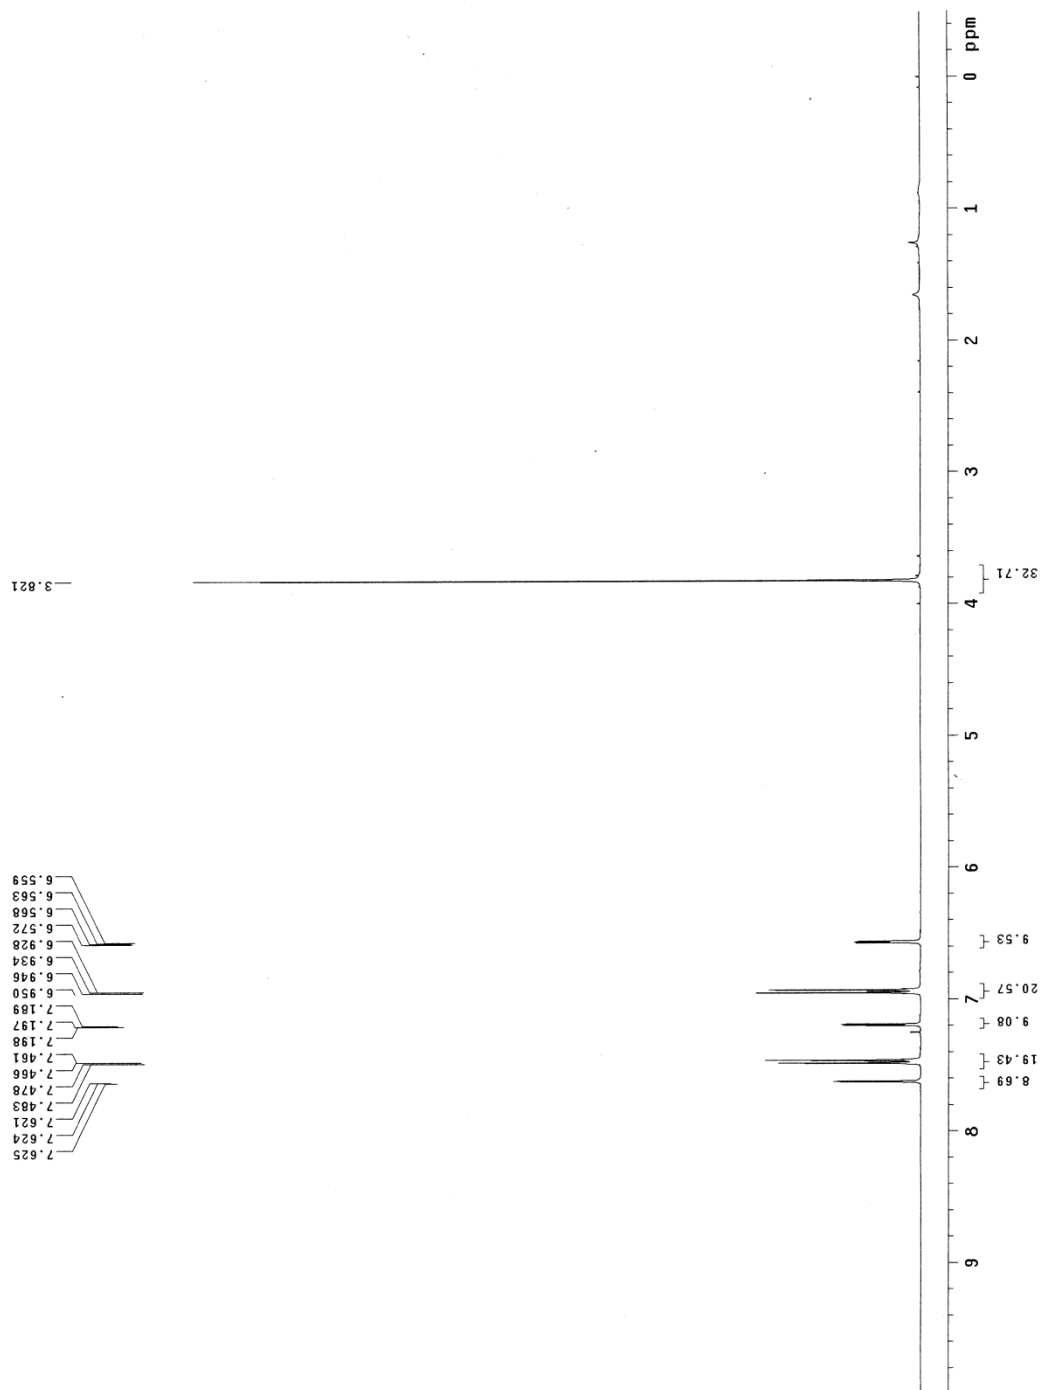

***Se*-4-Methoxyphenyl furan-2-carboselenoate (3r)**

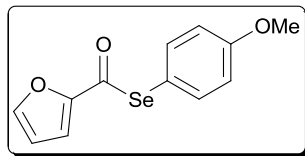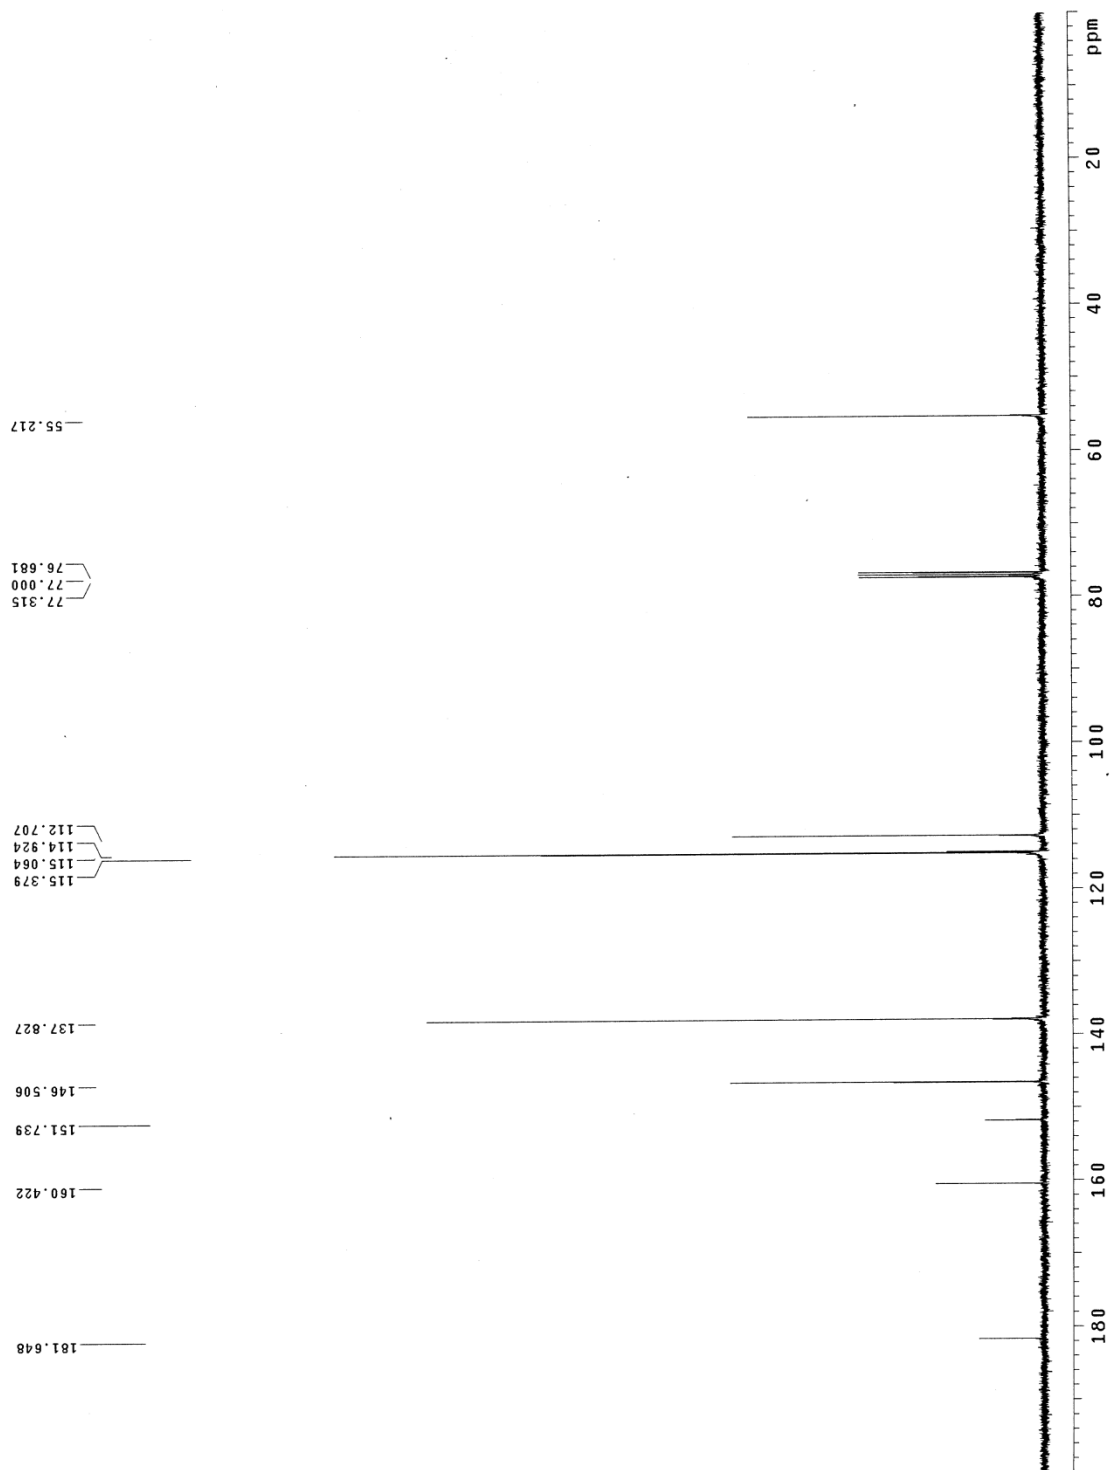

***Se*-Methyl 4-(diethylamino)benzoselenoate (4a)**

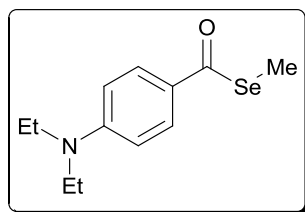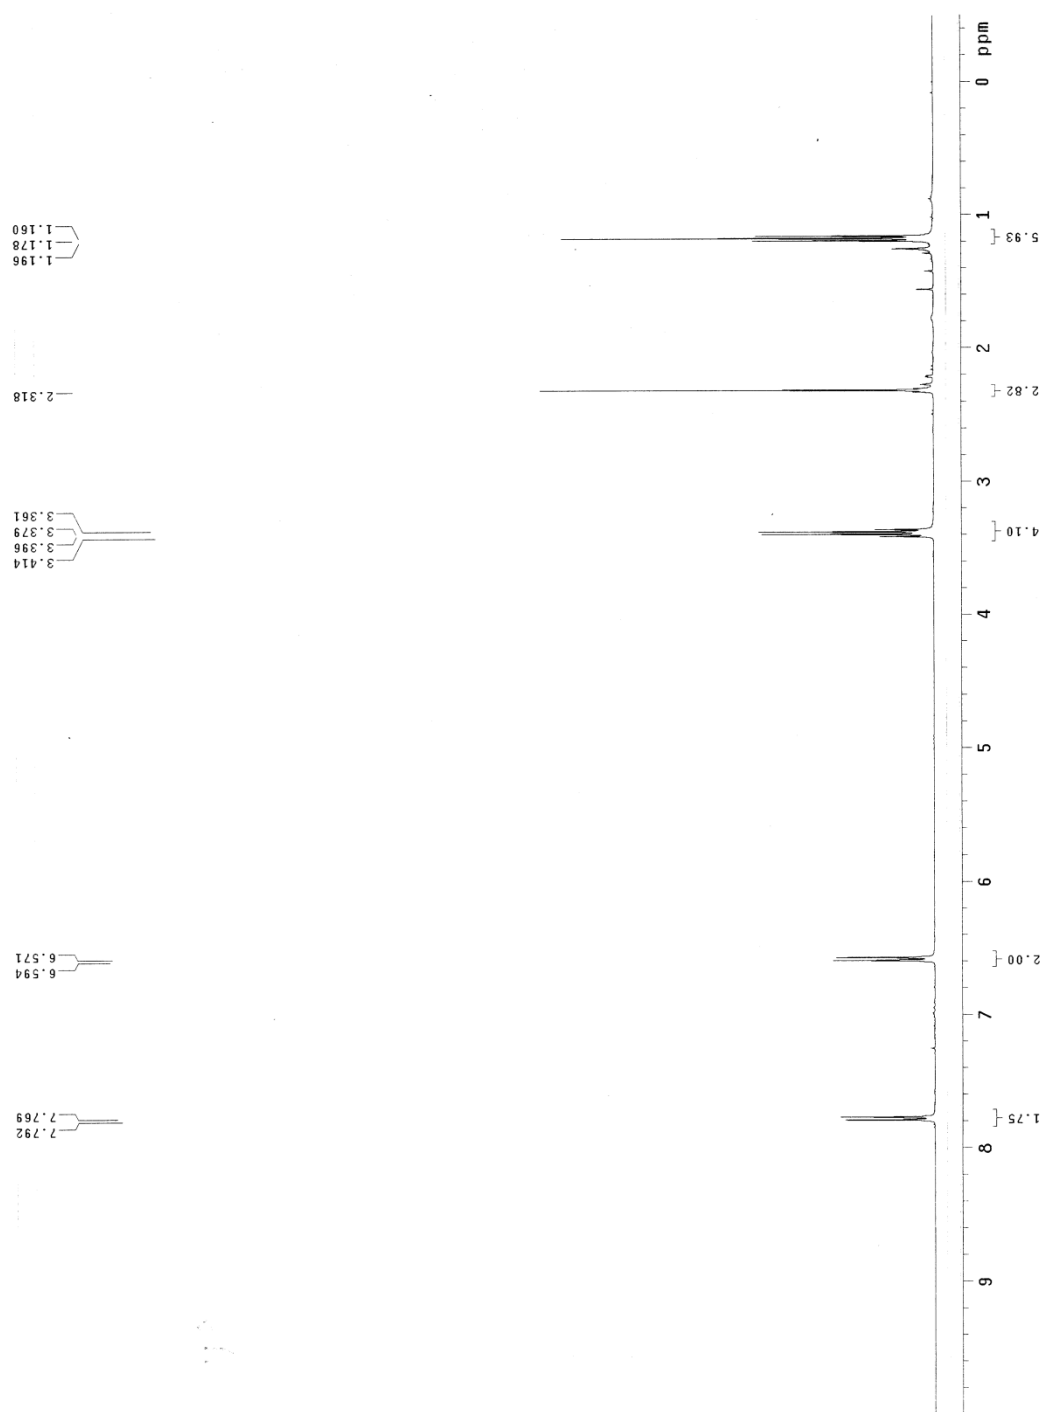

***Se*-Methyl 4-(diethylamino)benzoselenoate (4a)**

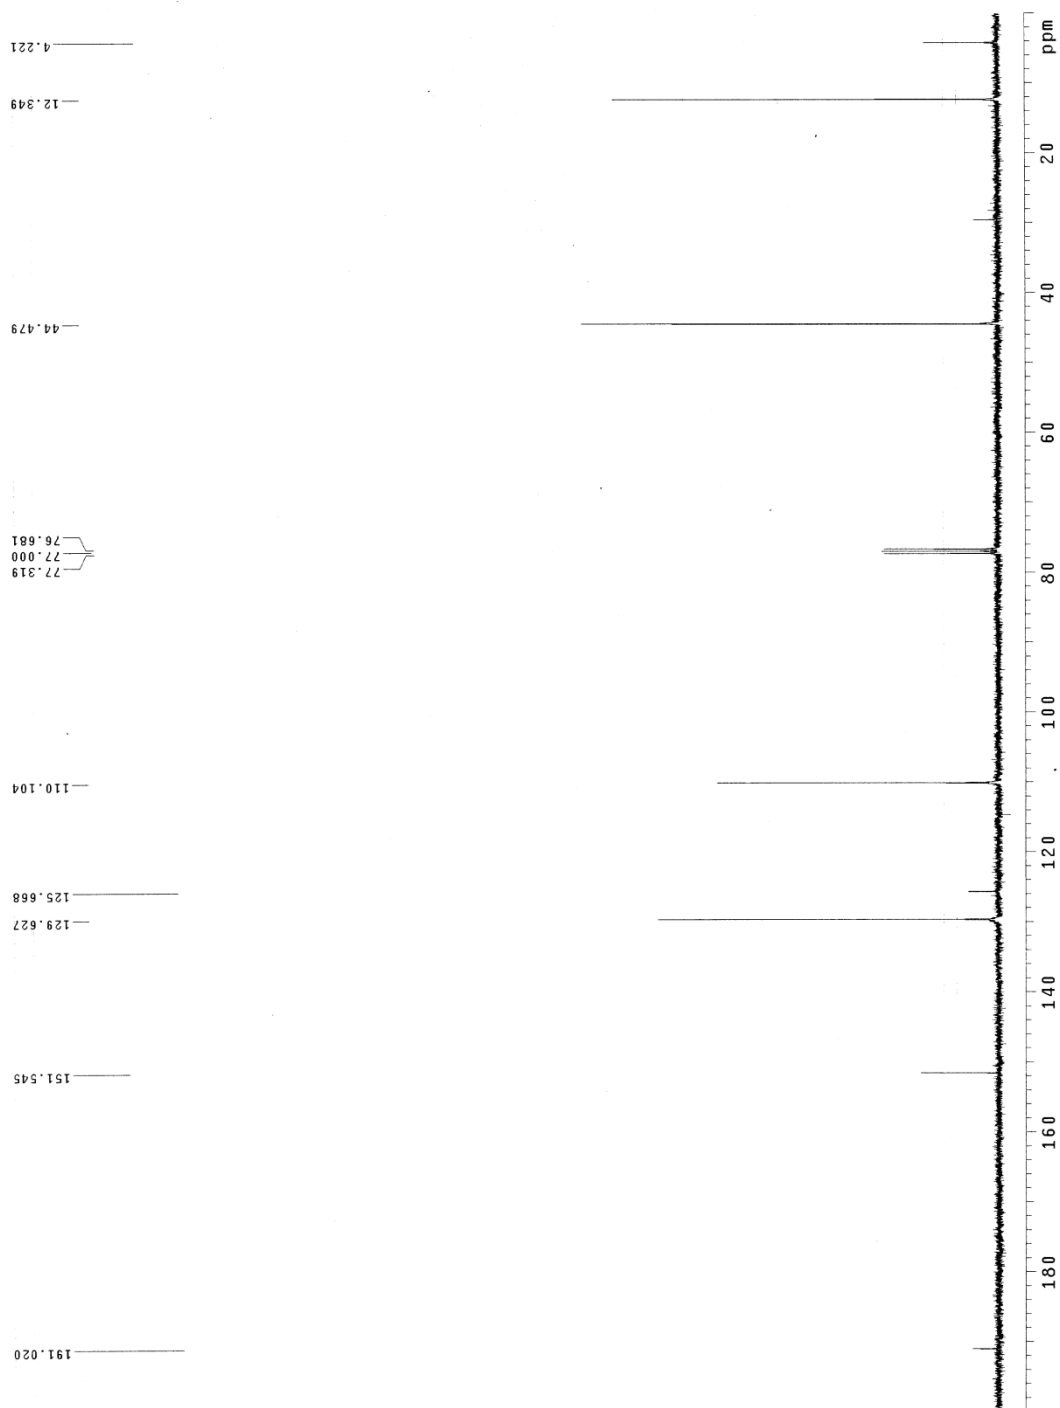

***Se*-Methyl 4-(dimethylamino)benzoselenoate (4b)**

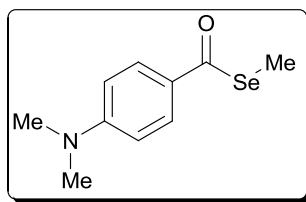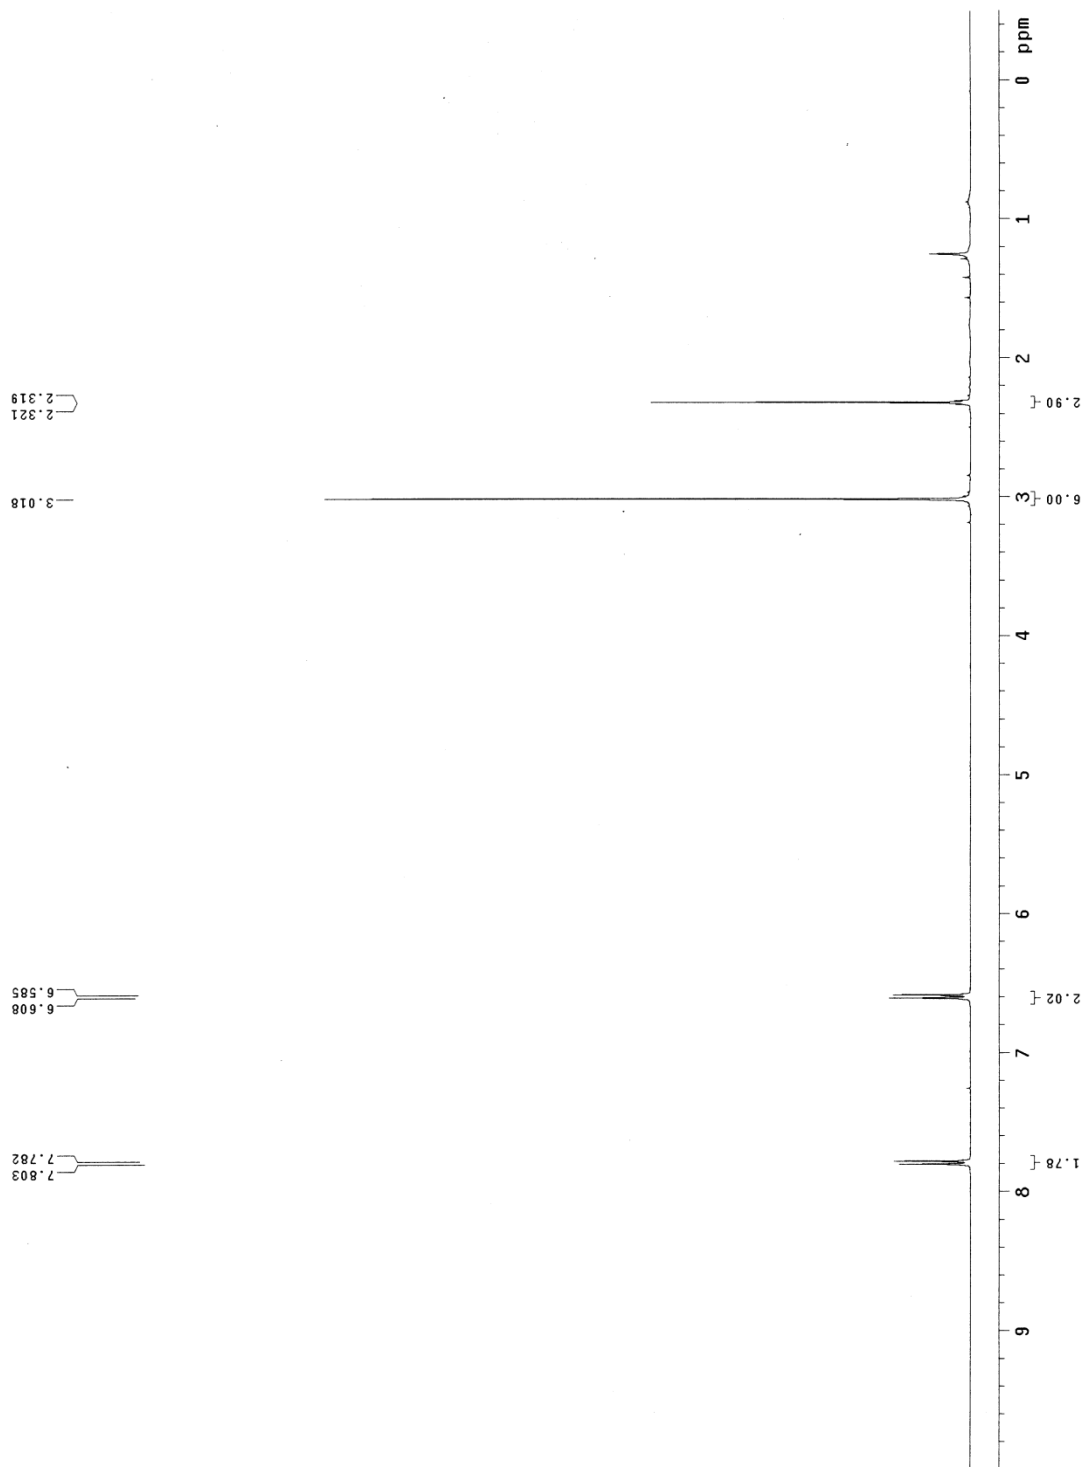

***Se*-Methyl 4-(dimethylamino)benzoselenoate (4b)**

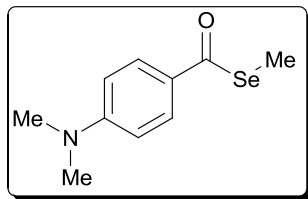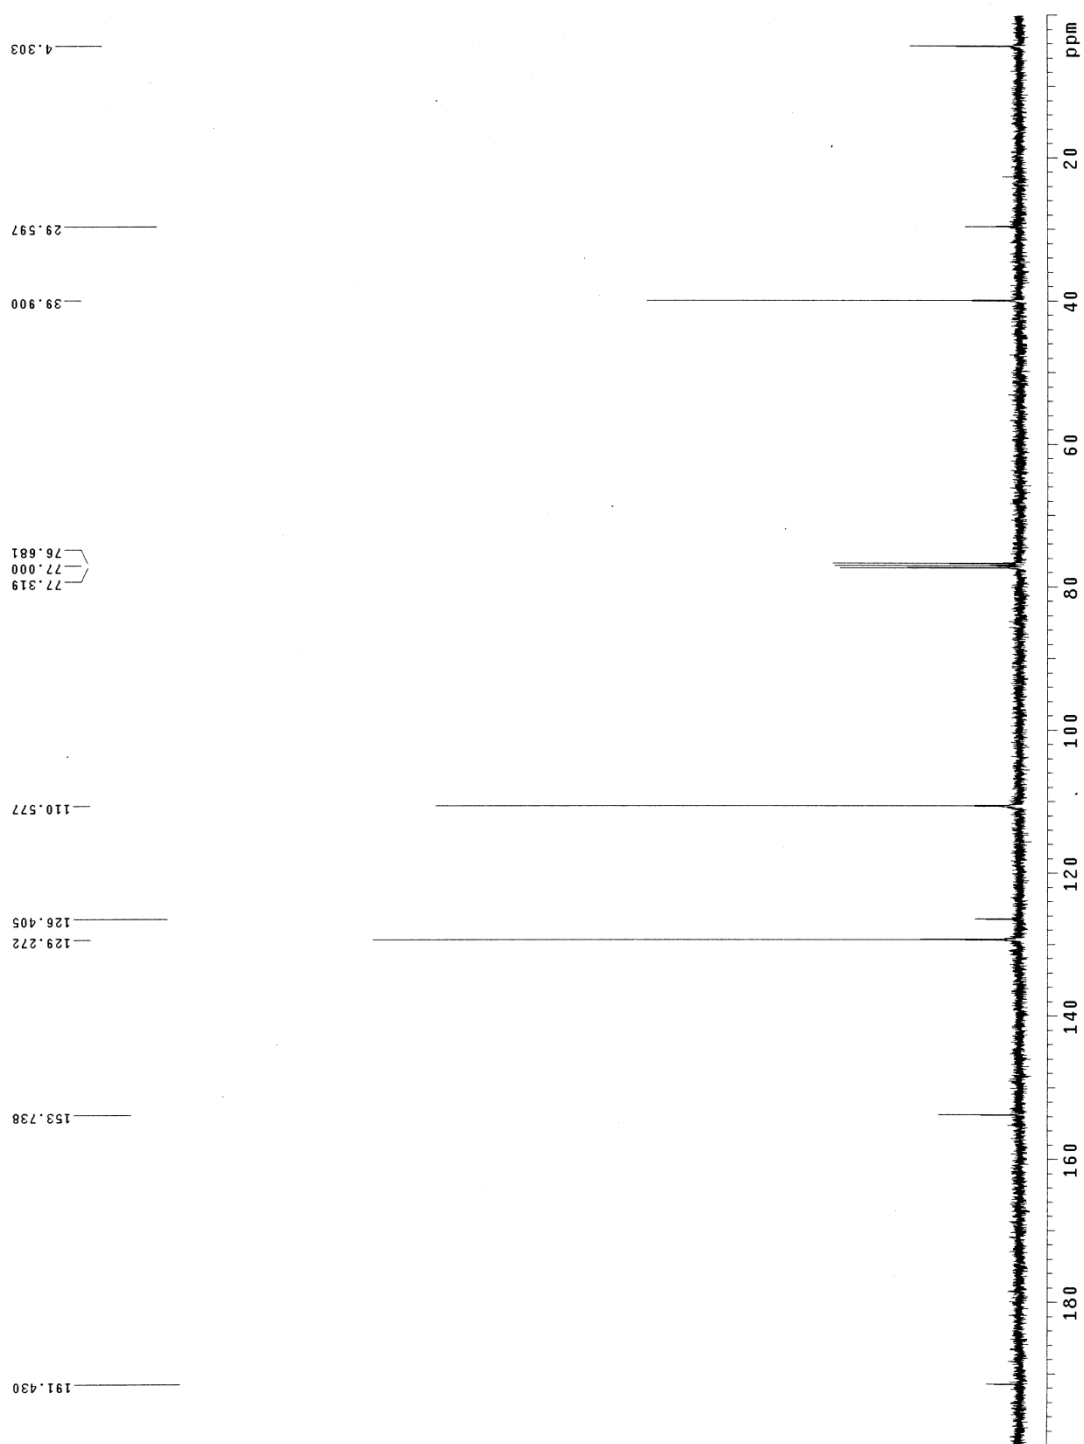

***Se*-(*n*-Heptyl) thiophene-2-carboselenoate (4c)**

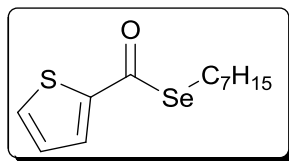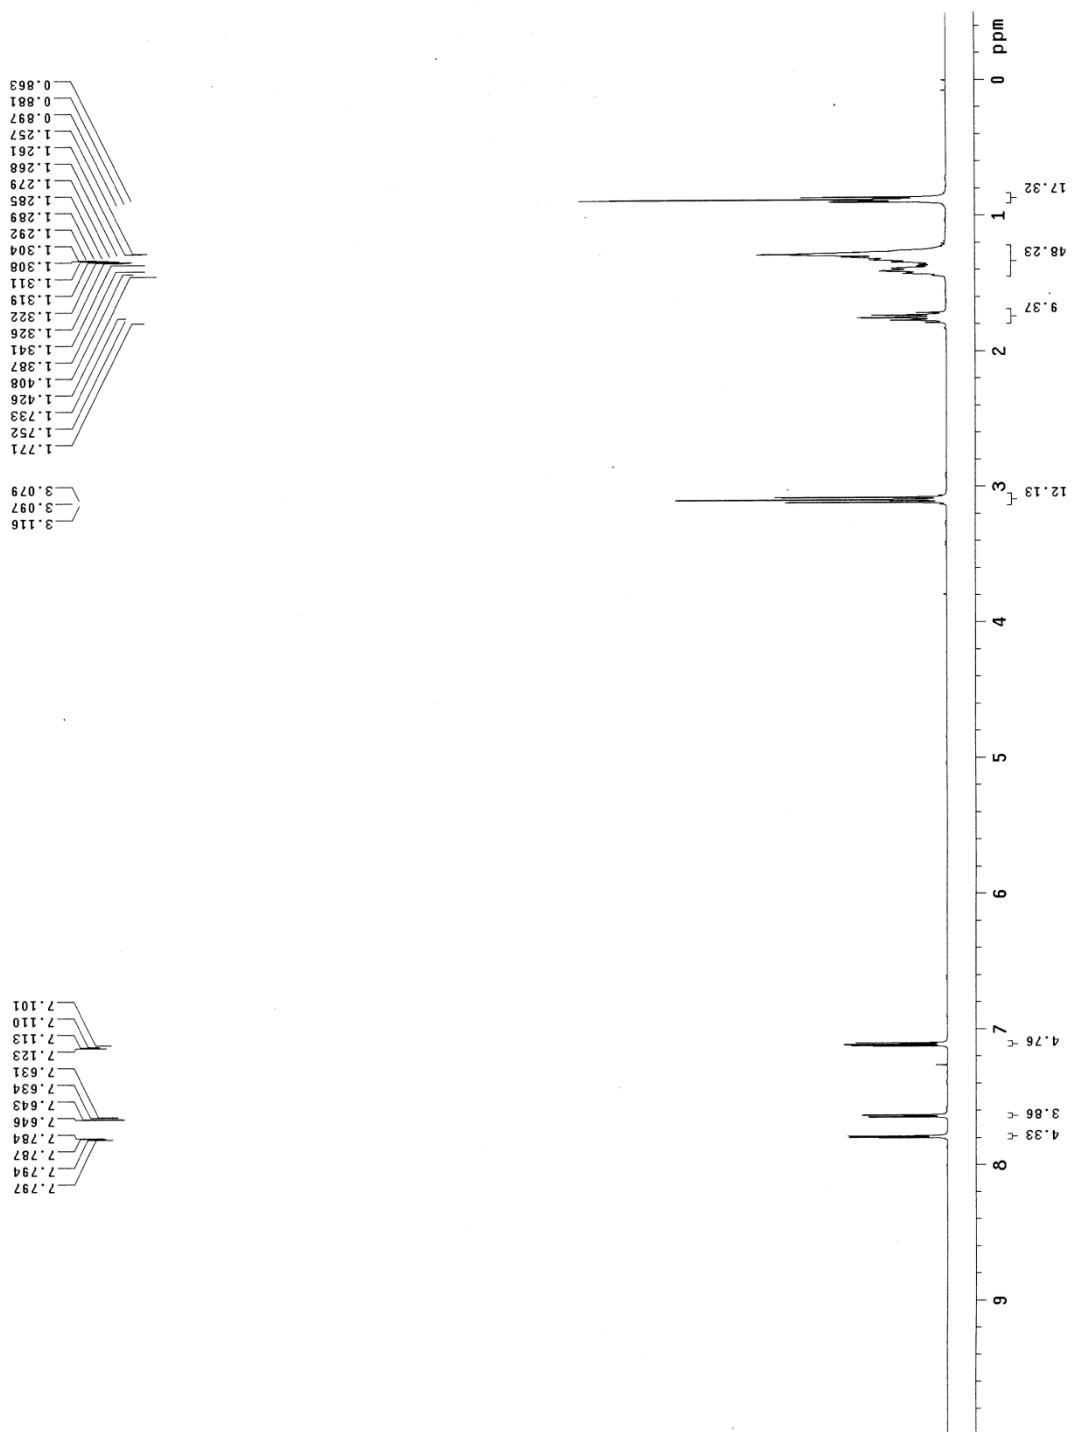



***Se*-(*n*-Heptyl) thiophene-2-carboselenoate (4c)**

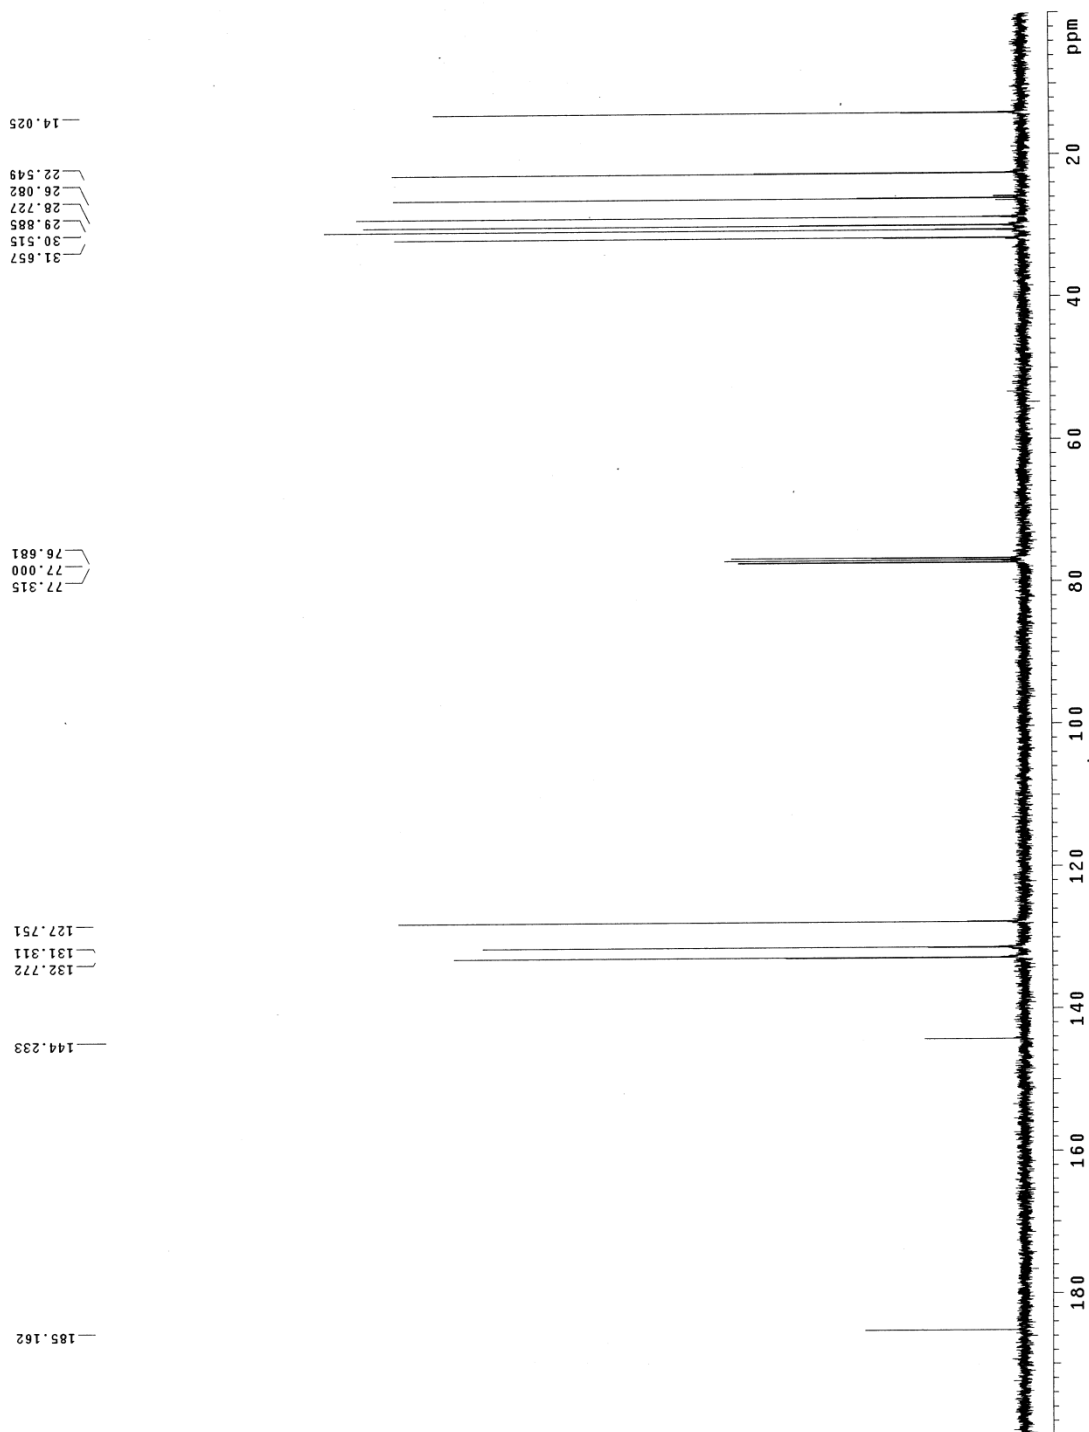

***Se*-(*n*-Heptyl) 4-(trifluoromethyl)benzoselenoate (4d)**

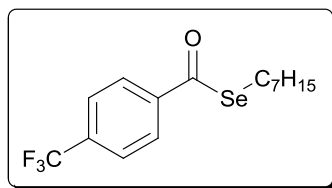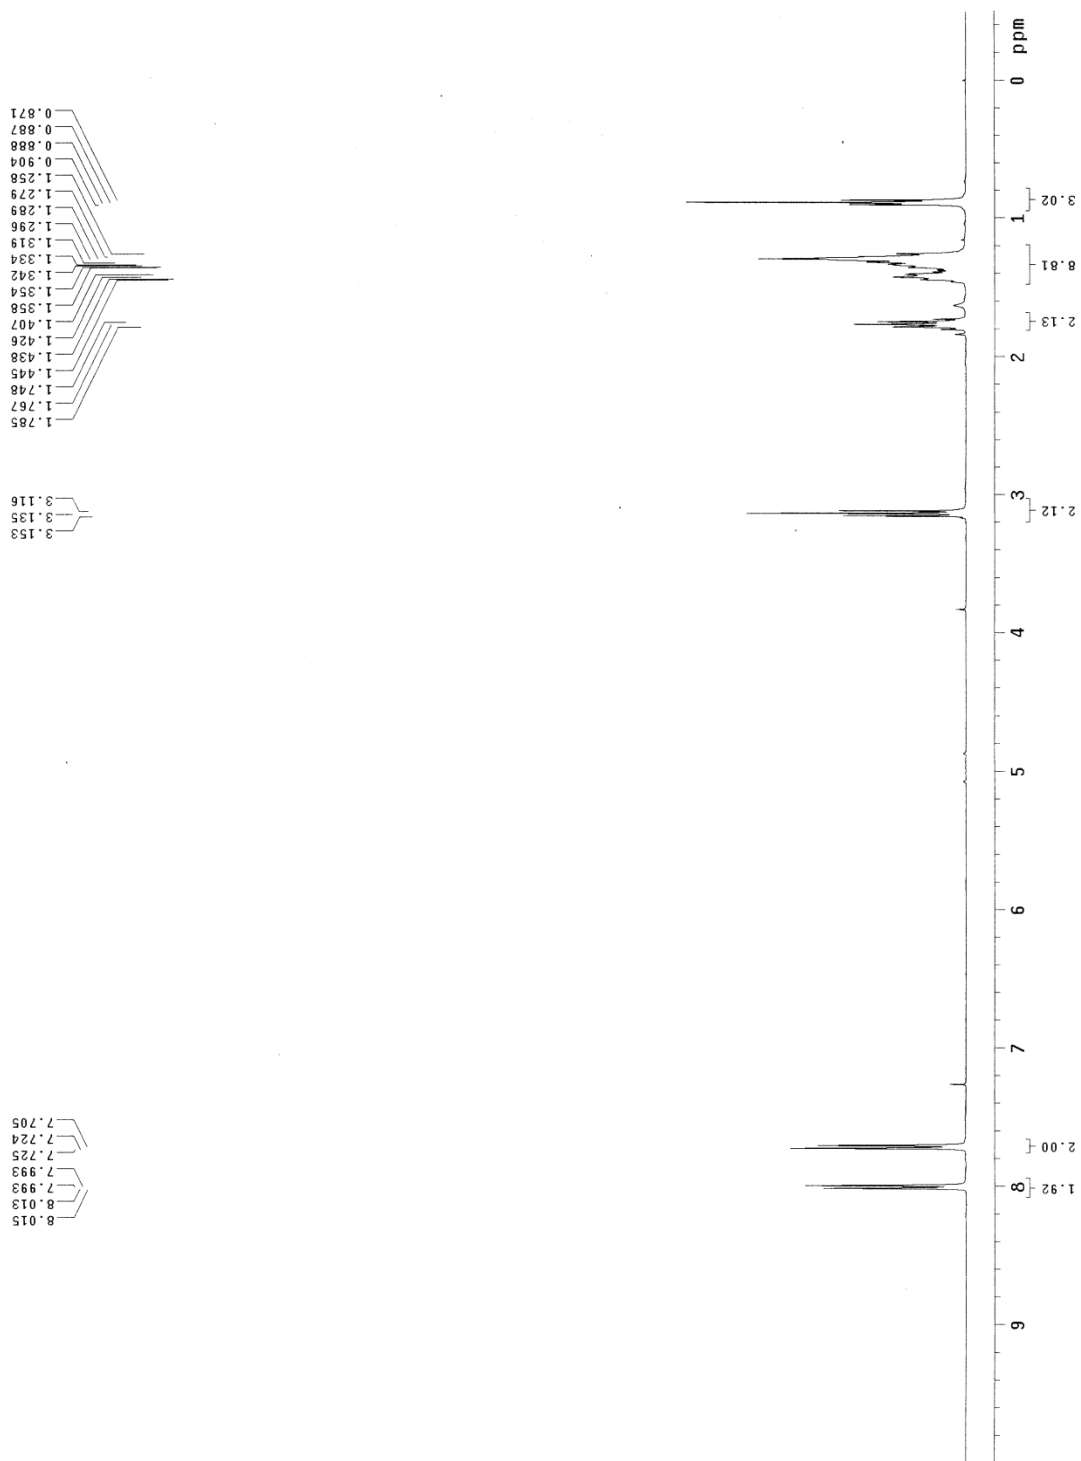

***Se*-(*n*-Heptyl) 4-(trifluoromethyl)benzoselenoate (4d)**

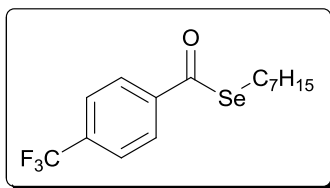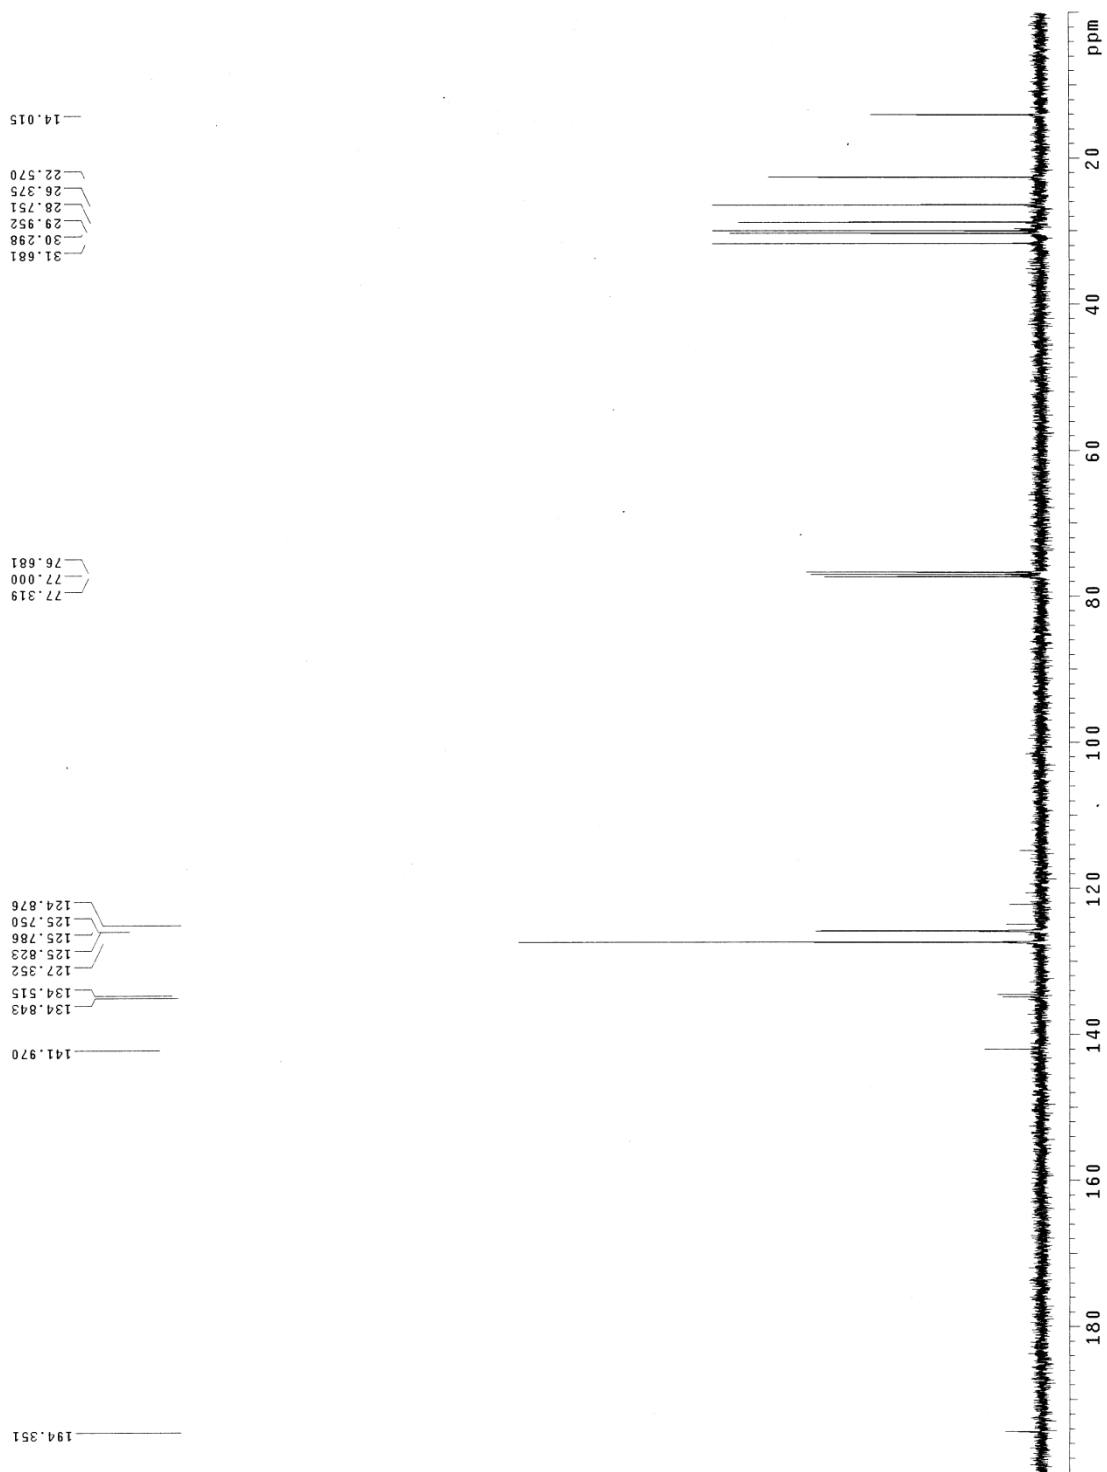

***Se*-(*n*-Heptyl) 4-(trifluoromethyl)benzoselenoate (4d)**



—64.710

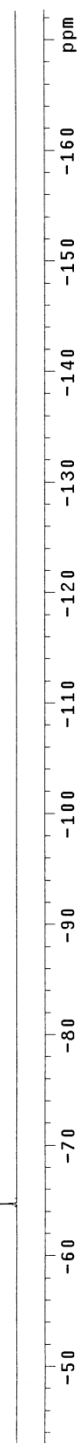

***Se*-(*n*-Heptyl) 4-*tert*-butylbenzoselenoate (4e)**

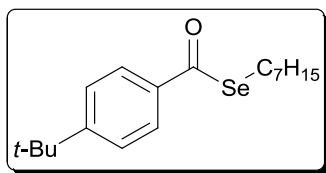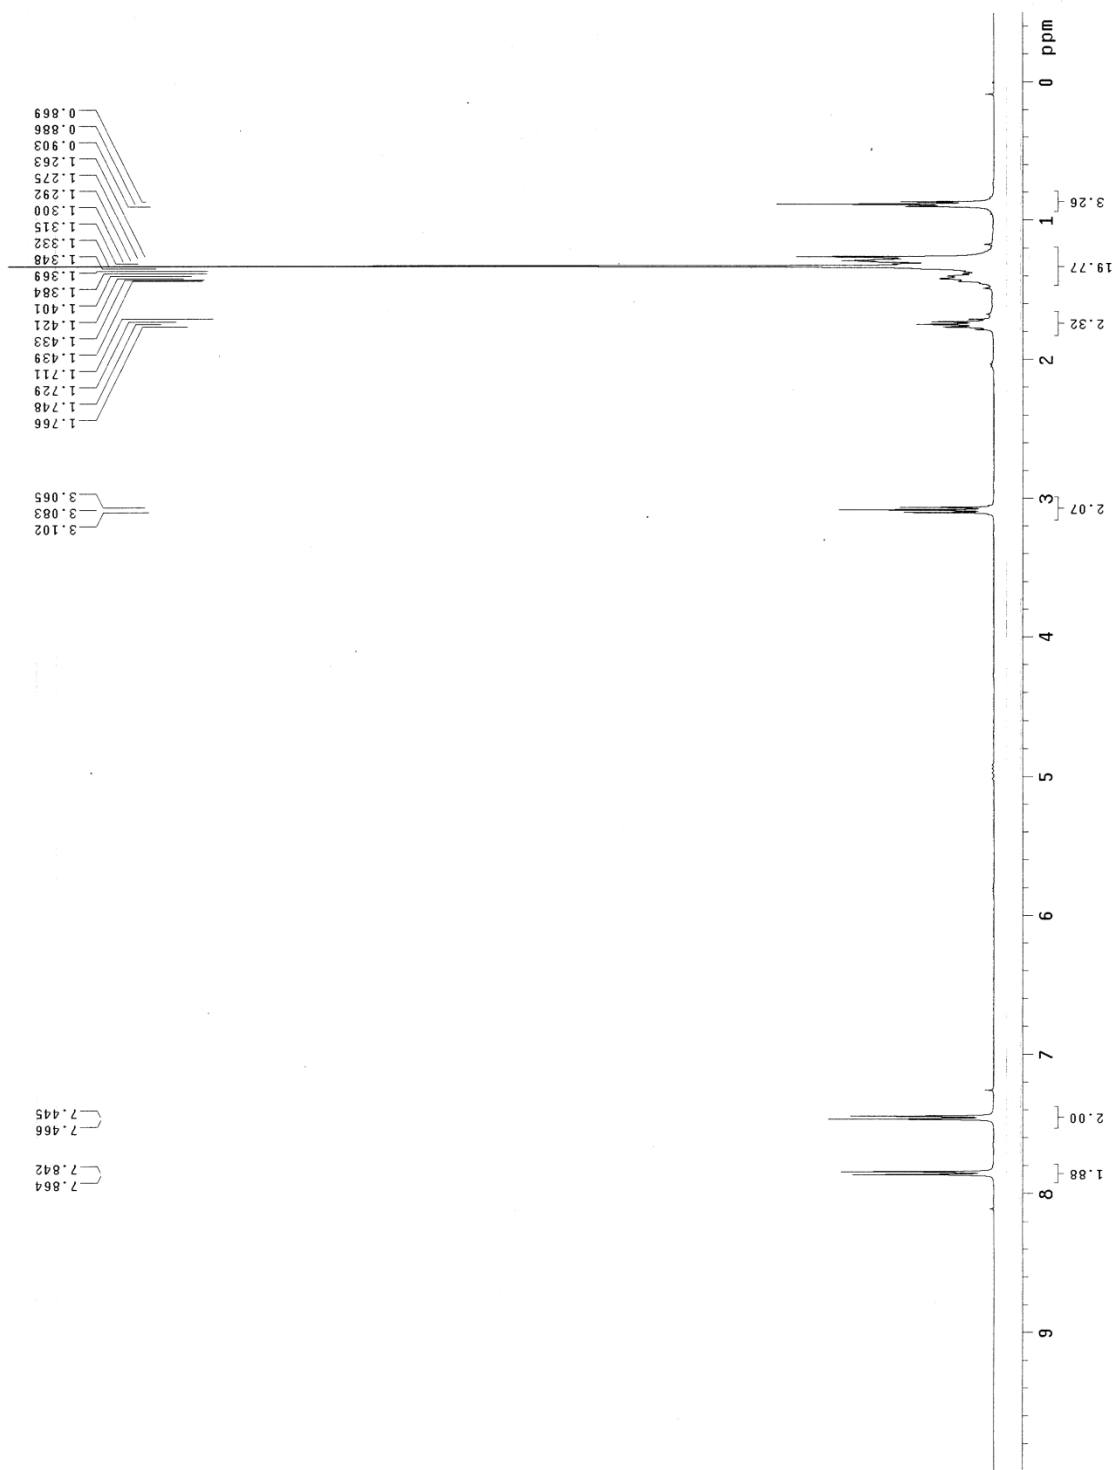

***Se*-(*n*-Heptyl) 4-*tert*-butylbenzoselenoate (4e)**

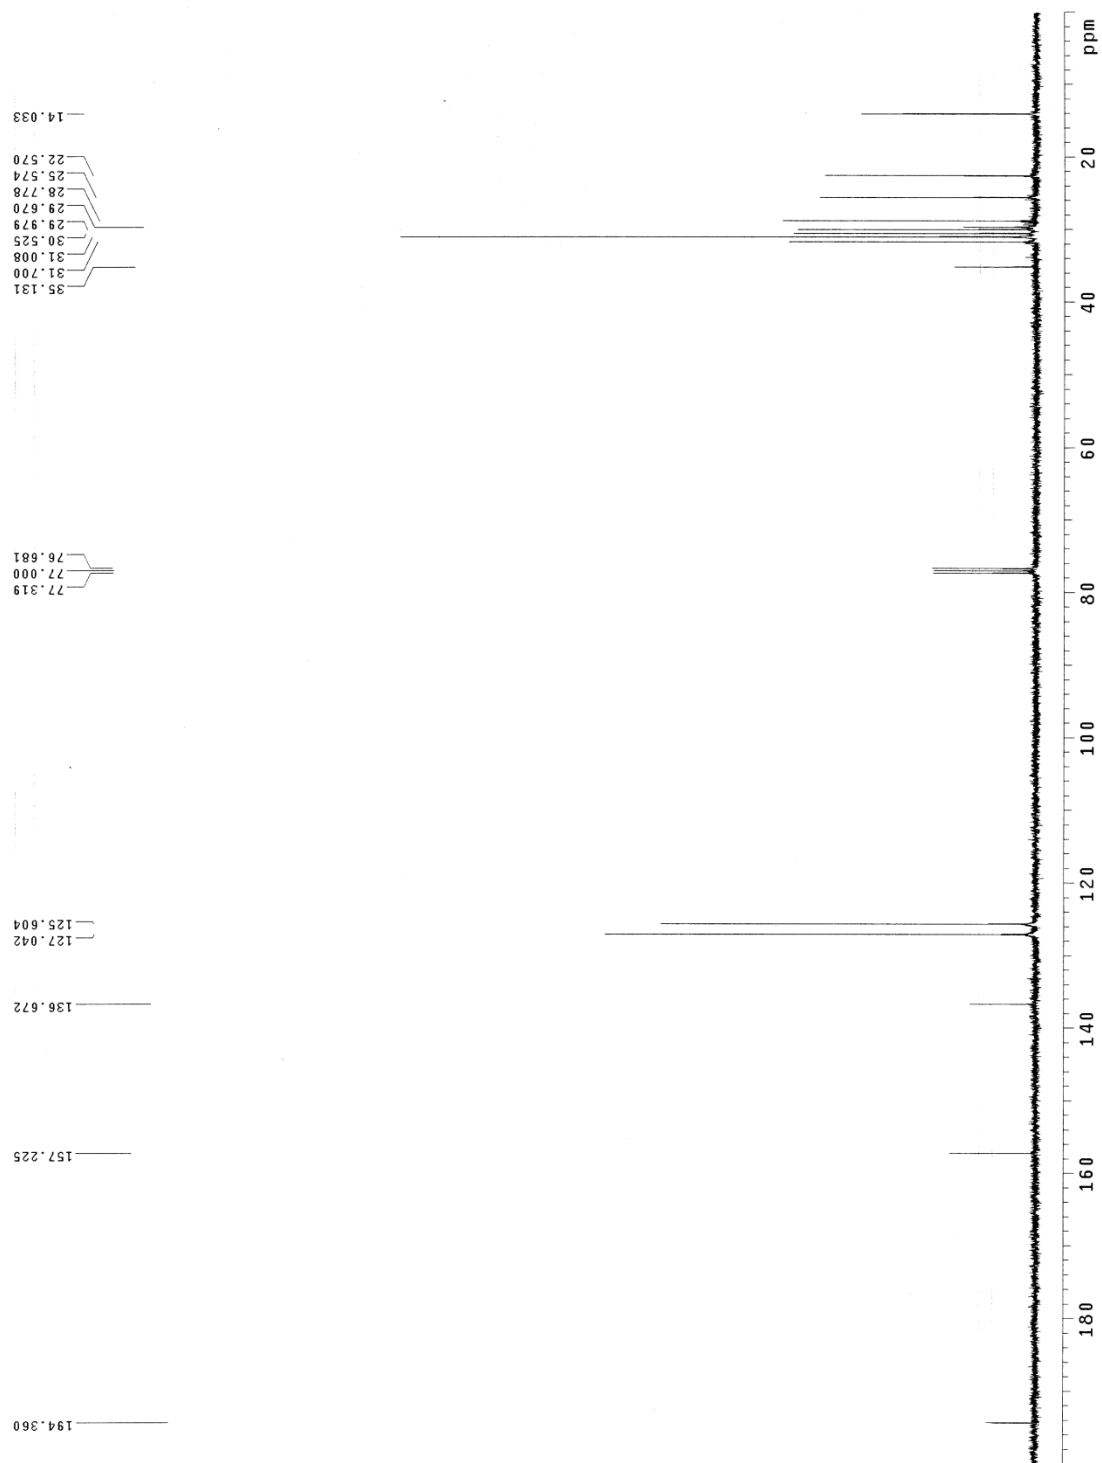

### Se-(*n*-Heptyl) 3-methylbenzoselenoate (4f)

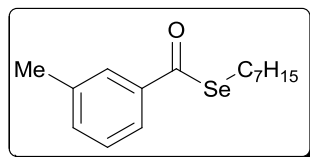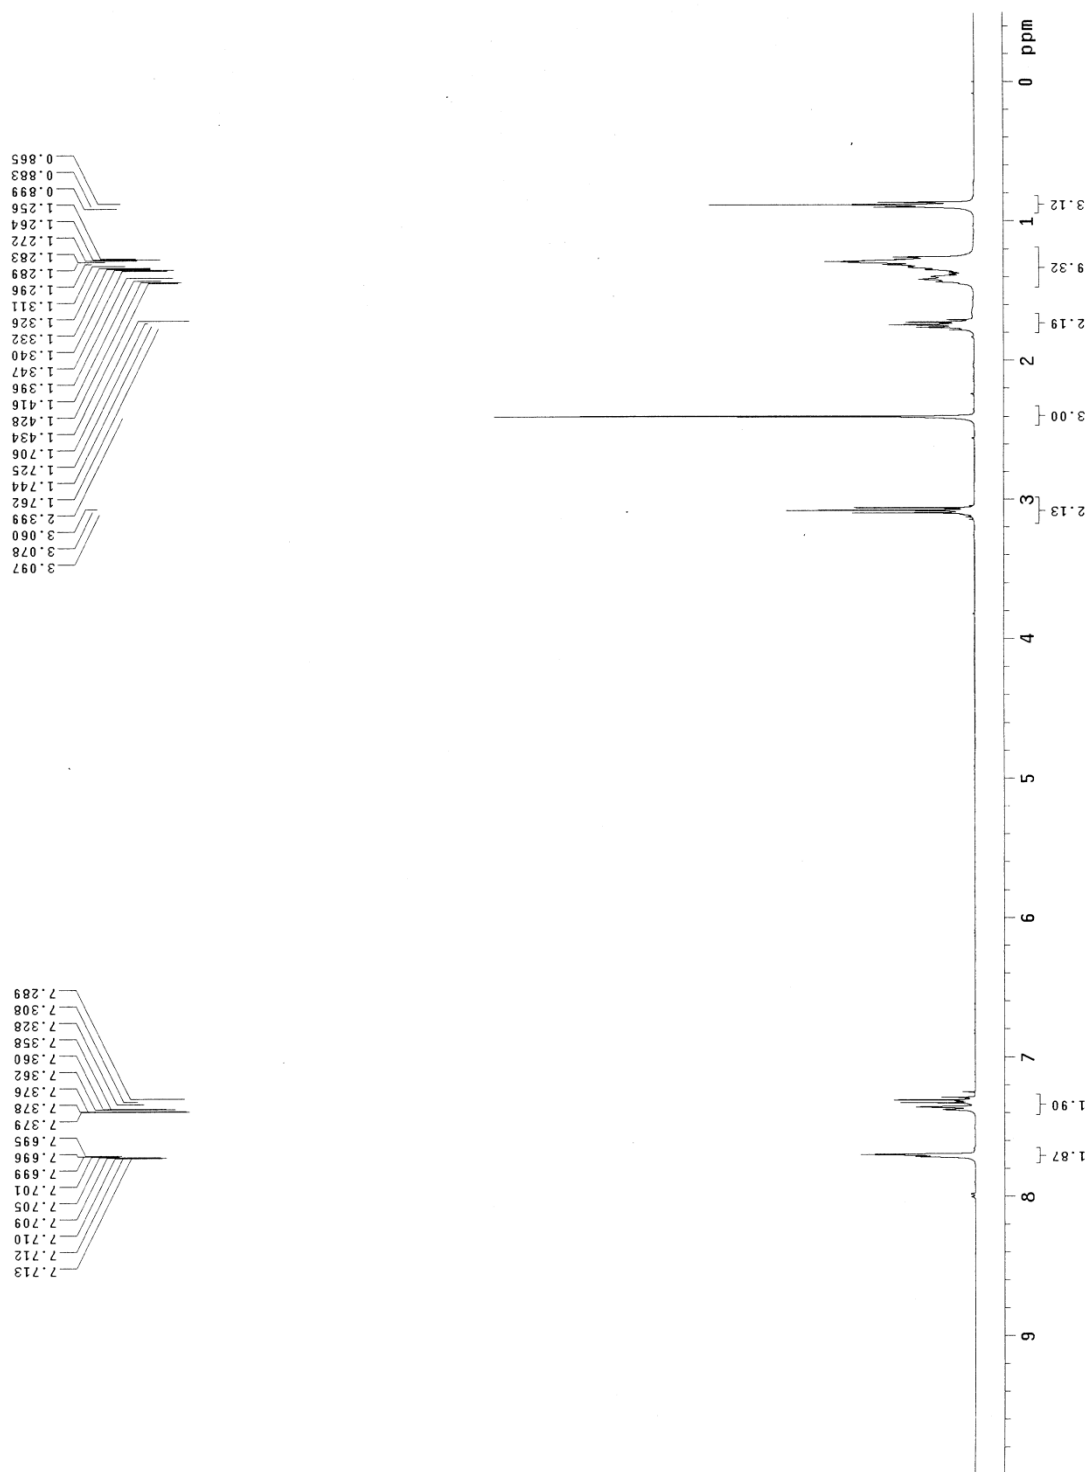

### Se-(*n*-Heptyl) 3-methylbenzoselenoate (4f)

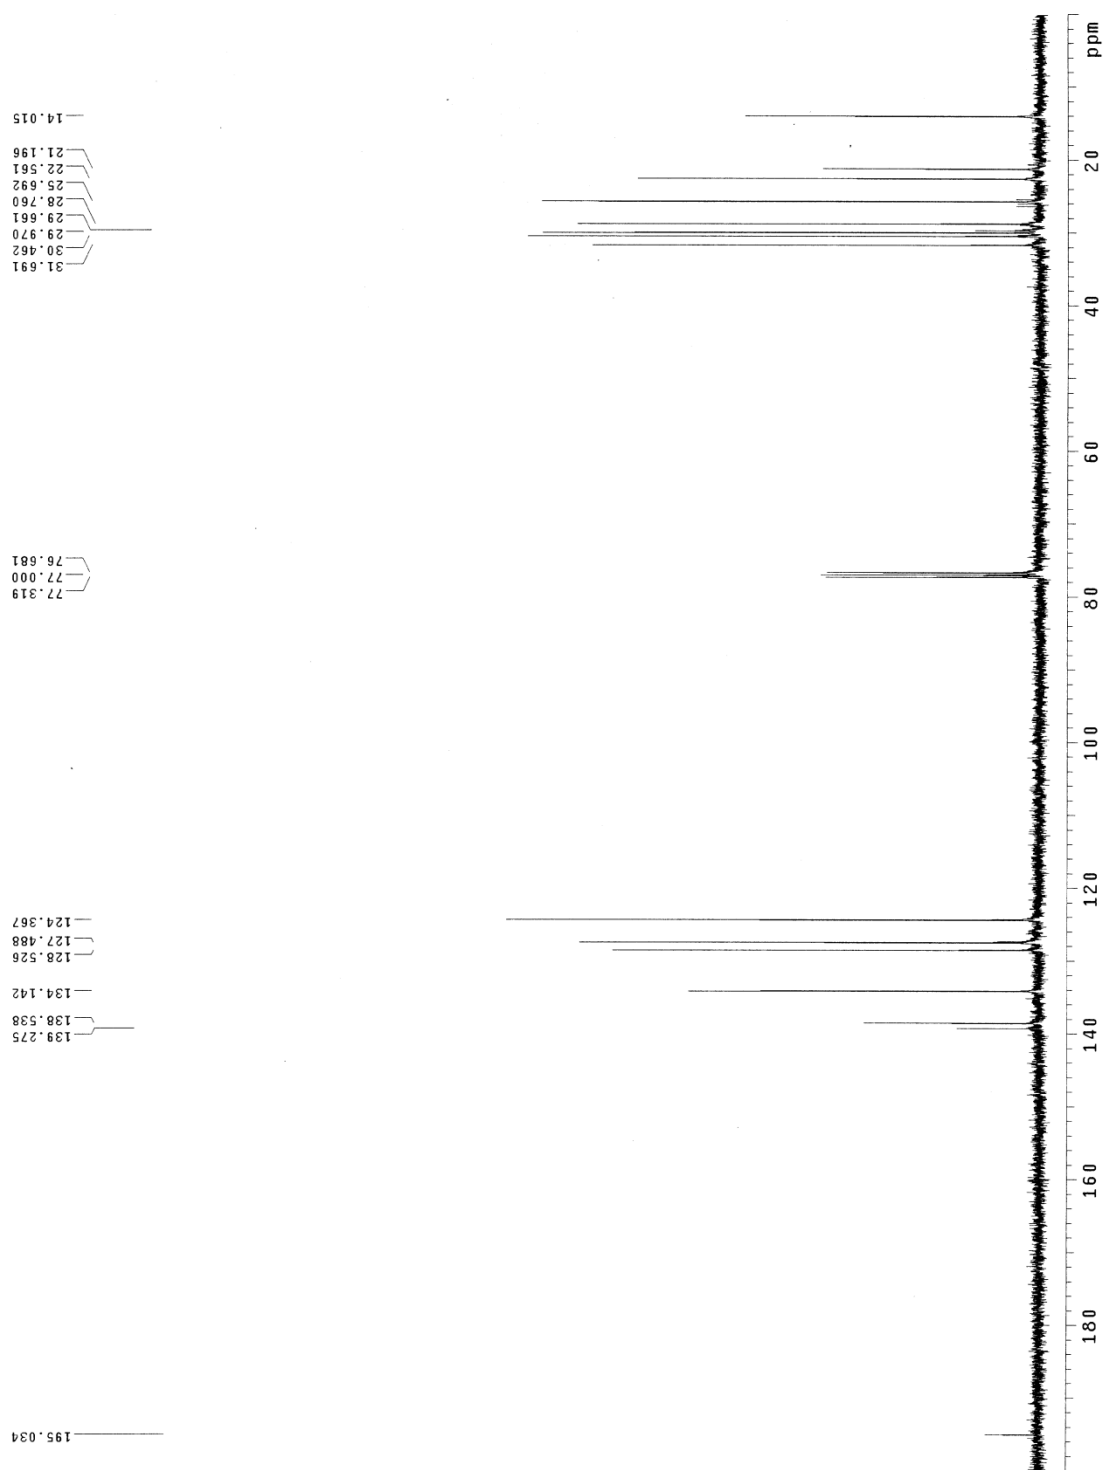



***Se*-(*n*-heptyl) benzoselenoate (4g)**

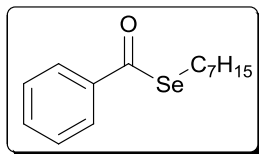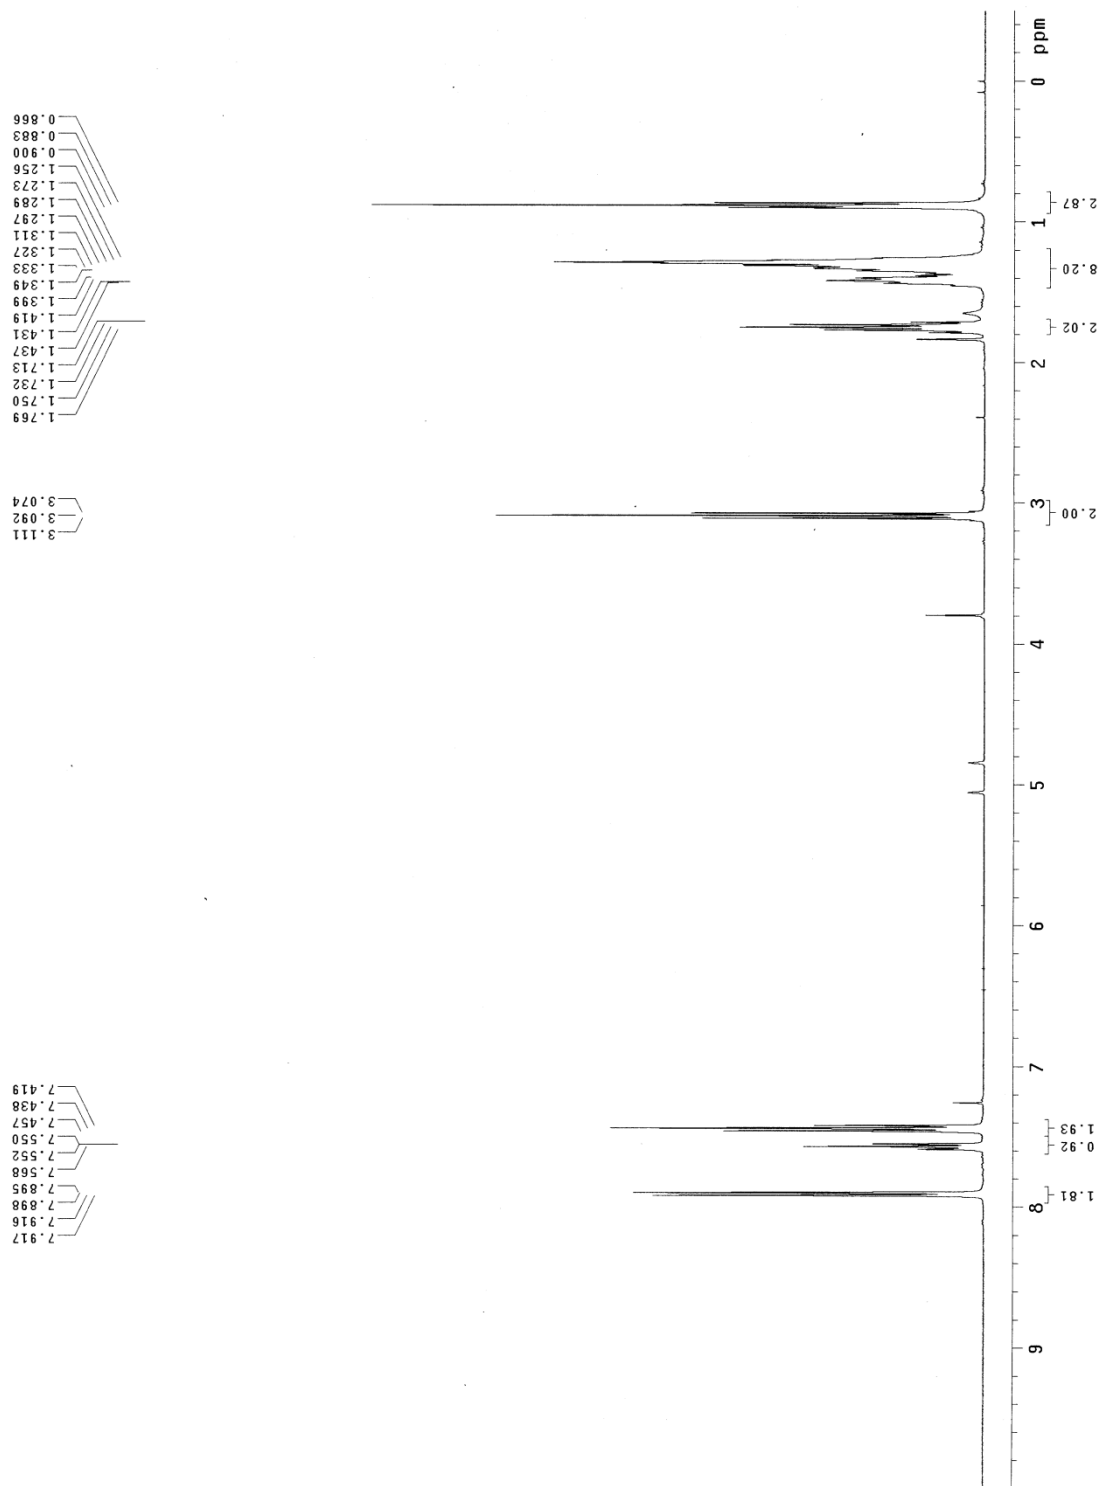

***Se*-(*n*-heptyl) benzoselenoate (4g)**

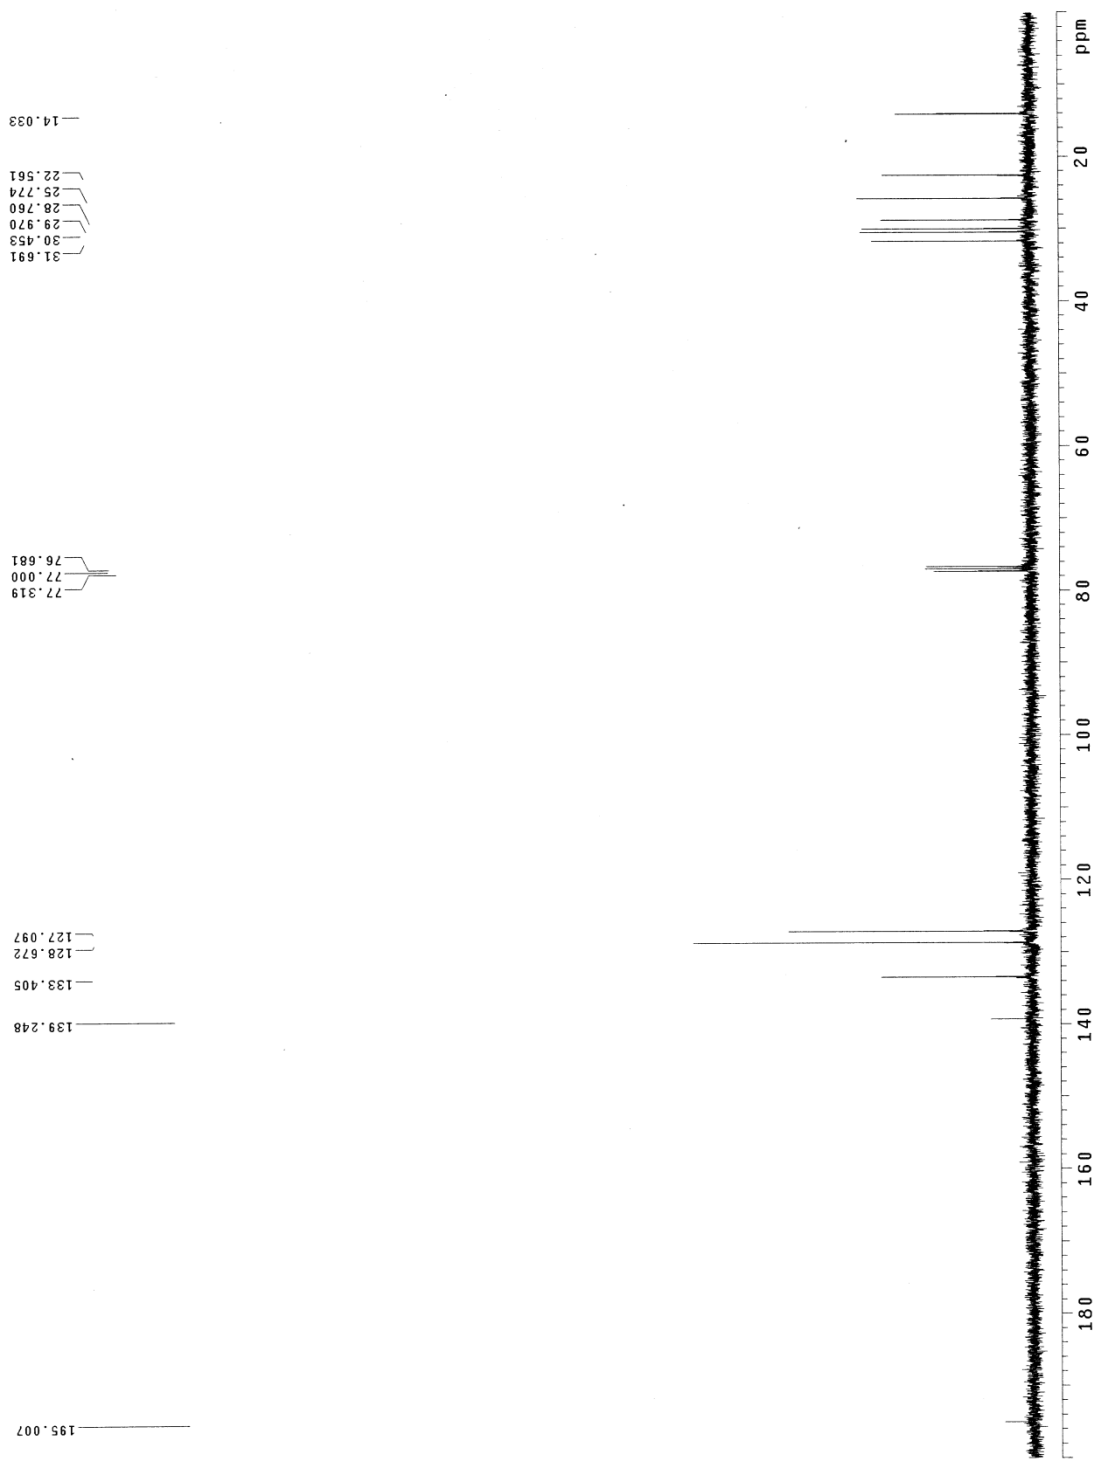

***Se*-(*n*-heptyl) 4-chlorobenzoselenoate (4h)**

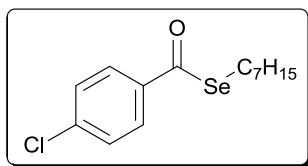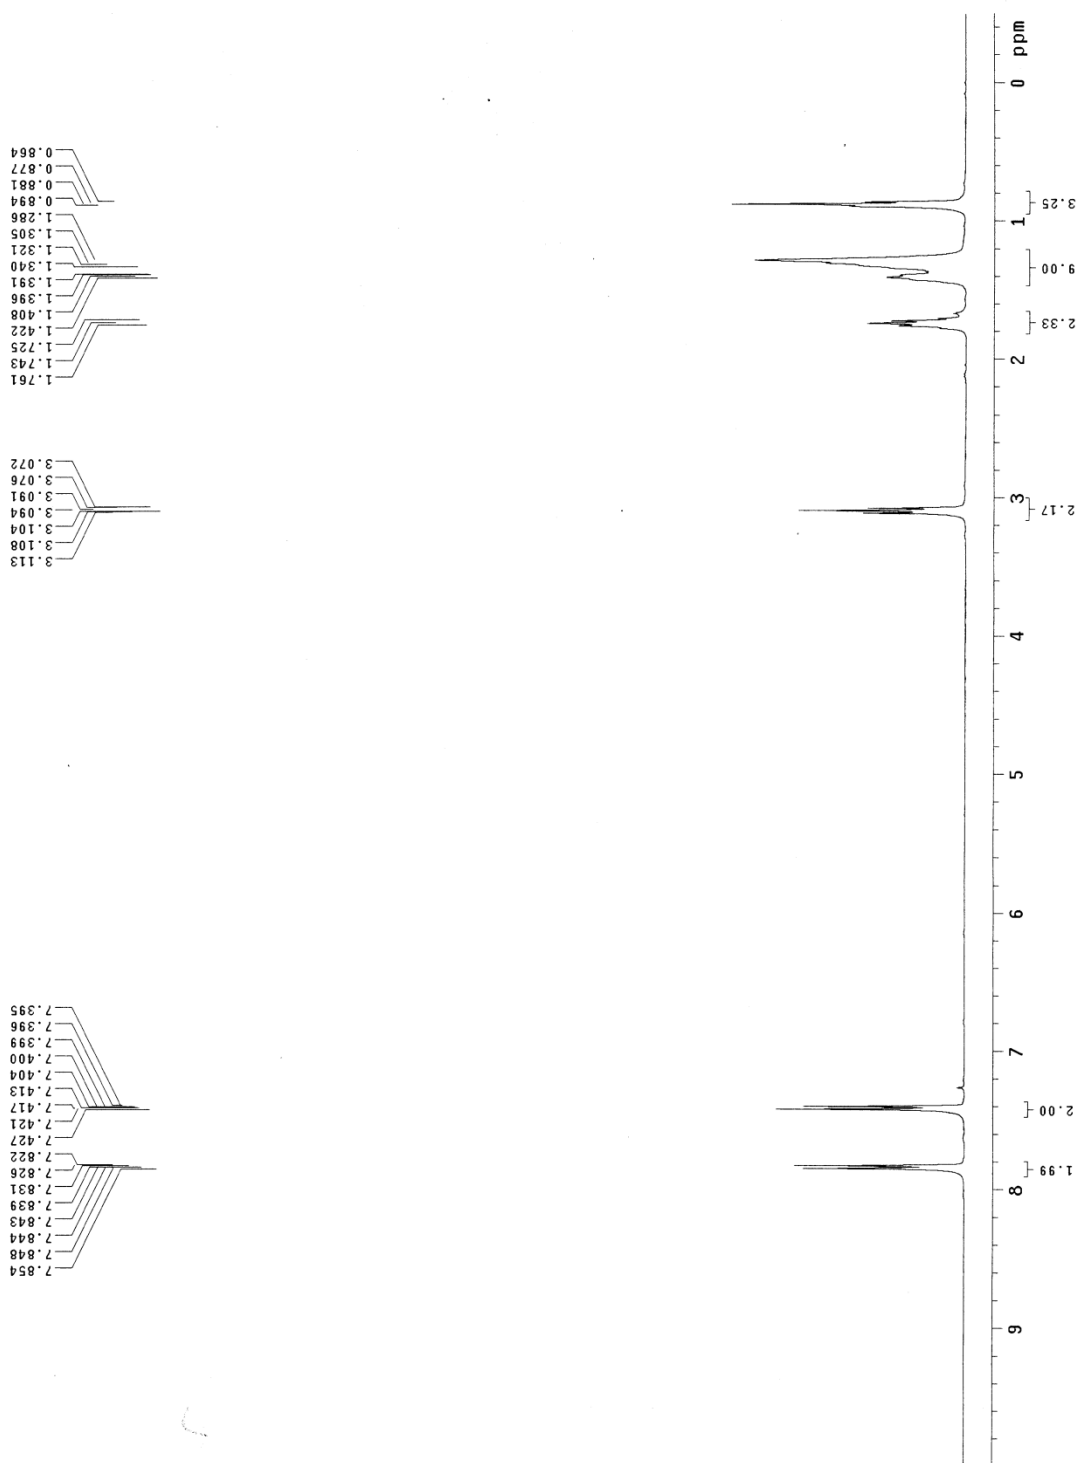

***Se*-(*n*-heptyl) 4-chlorobenzoselenoate (4h)**

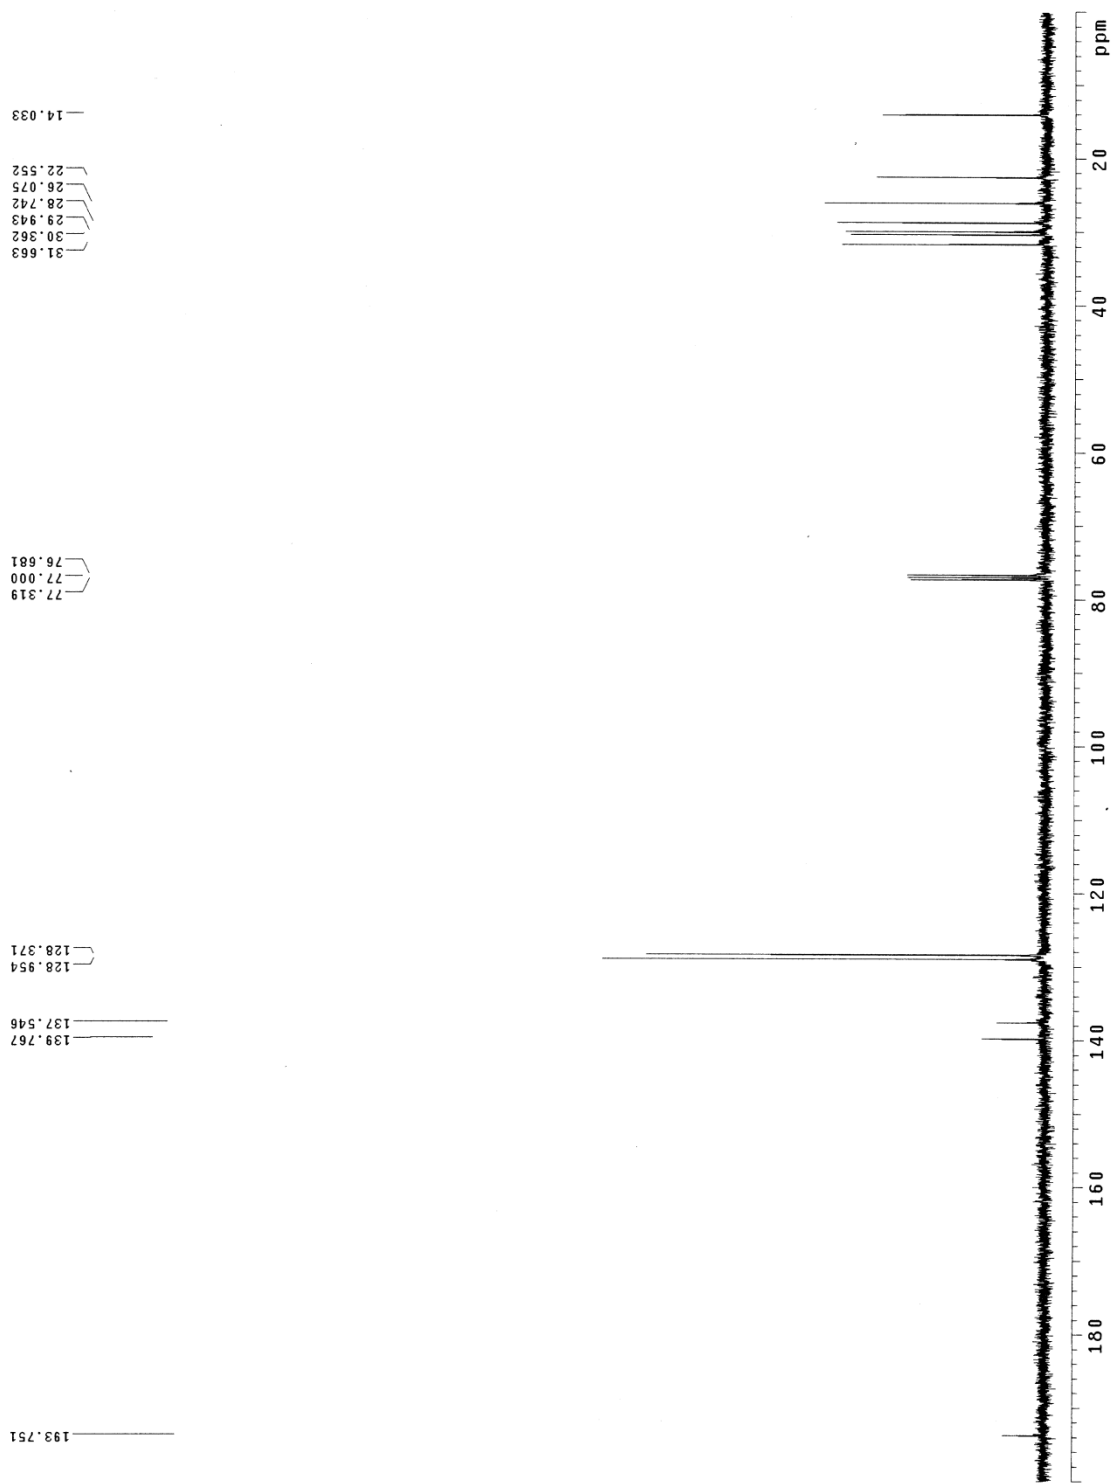

***Se*-Benzyl 4-methoxybenzoselenoate (4i)**

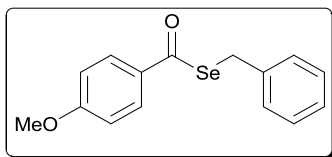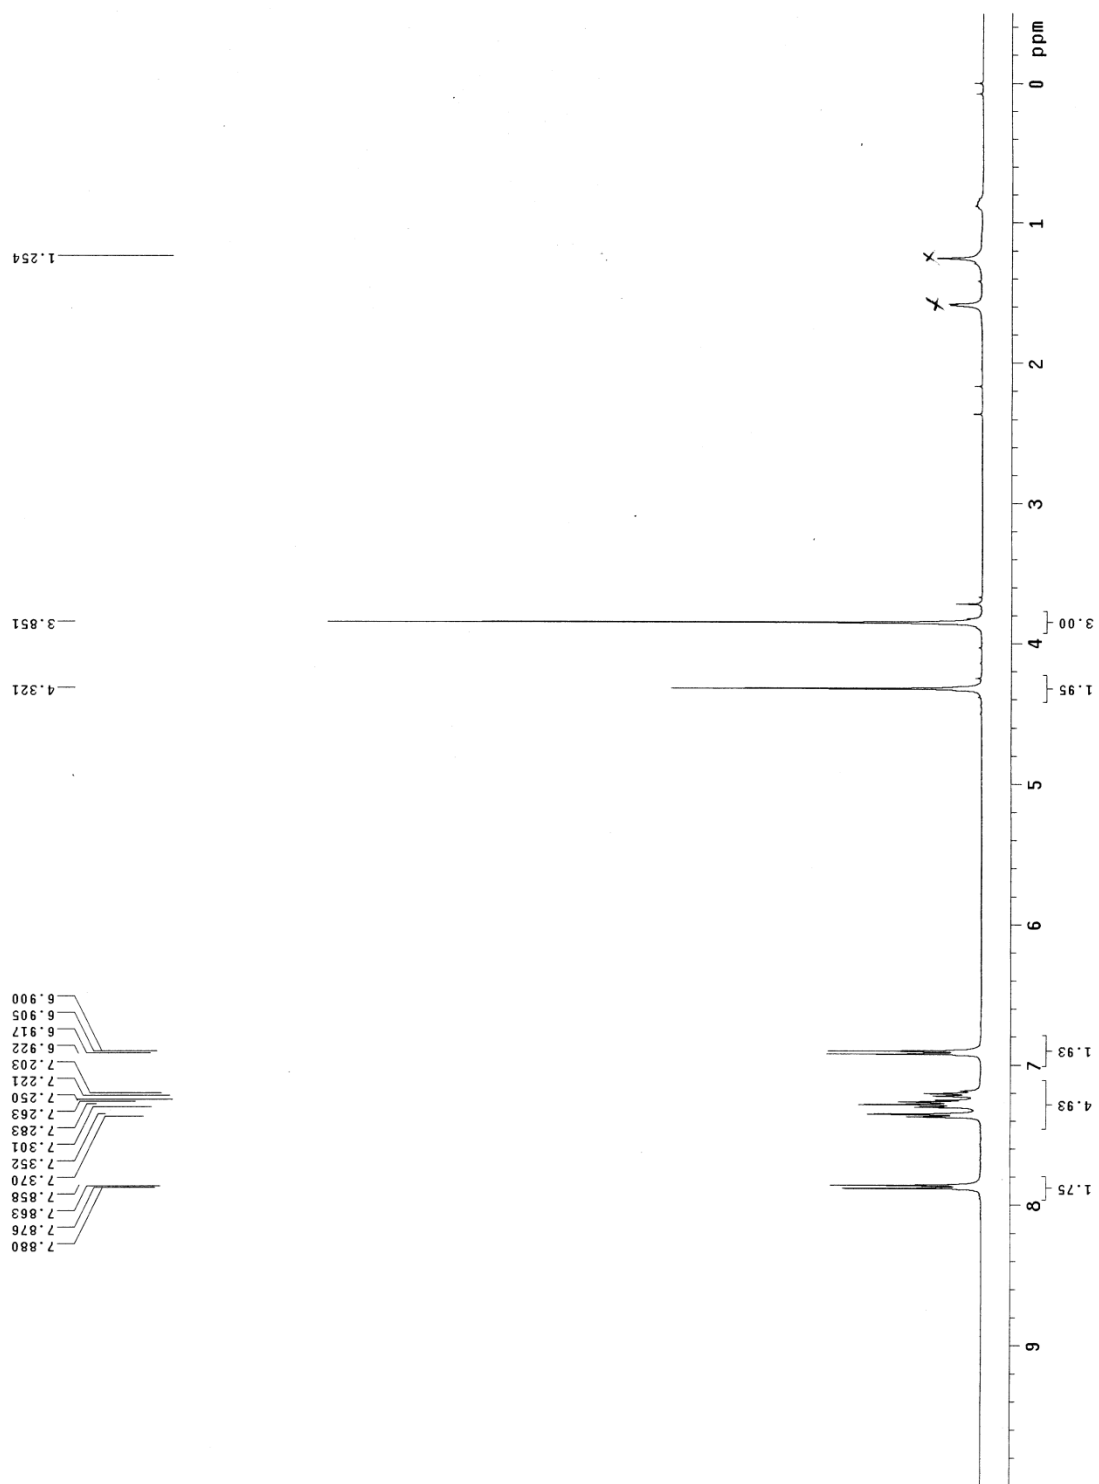

***Se*-Benzyl 4-methoxybenzoselenoate (4i)**

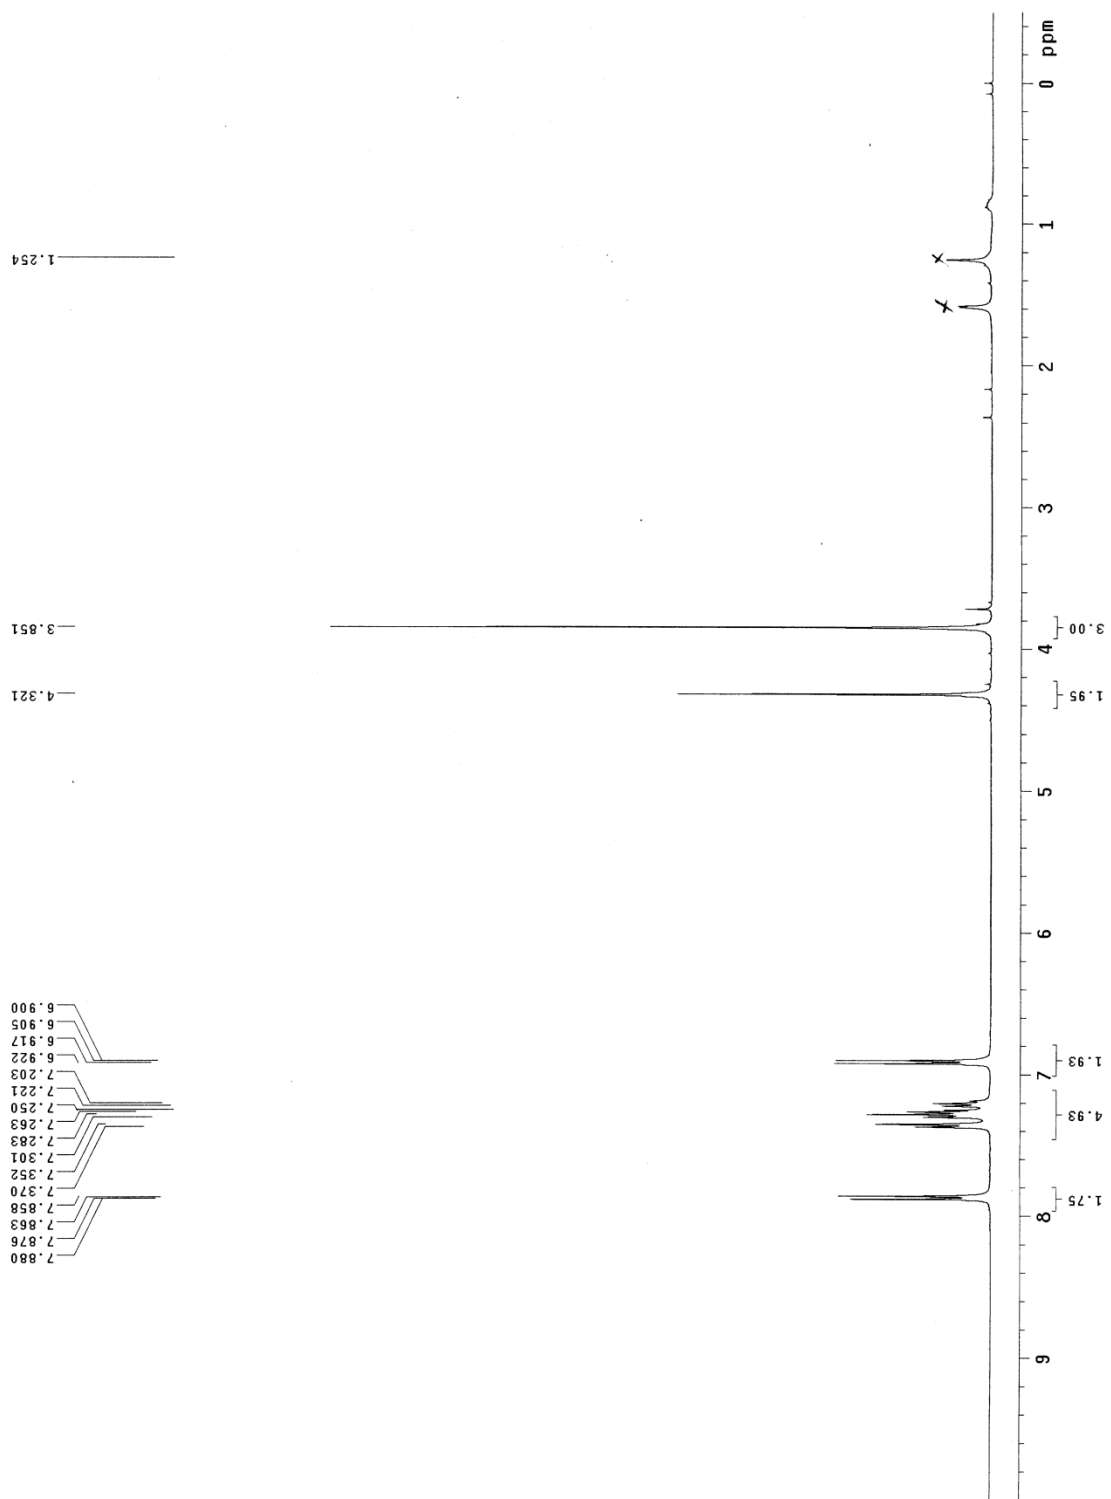

Supplement: c4ra07983c1.pdf [file c4ra07983c1.pdf]
